# Supplementary material for: Linking COVID-19 to Neurodegeneration: A Single-Cell Deep Learning Study of PBMCs in Multiple Sclerosis and Alzheimer’s Disease
Source: Research Square preprint supplement (doi:10.21203/rs.3.rs-7342199/v1), 2025-10-08
Supplement: Supplementary file 2 [file 2688708638b300b362bff7d9.xlsx]

## Sheet: Sheet1
Table6. sorted_data_Monocyte_MS
Class0	Class1	gene
2.93	-2.44	NBEAL1
2.48	-2.07	XIST
2.33	-1.93	TMSB4X
2.27	-1.89	ZNF90
2.09	-1.74	UQCRHL
2.02	-1.68	POLR2J3
2.02	-1.68	CALM2
1.97	-1.63	LSM5
1.91	-1.59	C1orf56
1.88	-1.56	LGALS1
1.84	-1.53	BLOC1S1
1.8	-1.51	ATXN8OS
1.78	-1.48	NACA2
1.77	-1.47	B2M
1.73	-1.44	CAPZA2
1.66	-1.38	DRAM2
1.59	-1.32	CLEC12A
1.59	-1.33	TRAM1
1.58	-1.33	C3AR1
1.56	-1.3	CAPZA1
1.54	-1.28	EEF1D
1.53	-1.27	CCNI
1.52	-1.26	ARL5A
1.49	-1.23	POMP
1.45	-1.21	ALOX5AP
1.45	-1.2	RBX1
1.43	-1.19	C4orf3
1.43	-1.19	CCR1
1.41	-1.18	NDUFB8
1.41	-1.17	MNDA
1.38	-1.15	NDUFA11
1.38	-1.15	CD44
1.37	-1.14	NUMB
1.35	-1.12	CLEC4A
1.32	-1.09	PRKCB
1.32	-1.1	BTF3L4
1.3	-1.08	FAM49B
1.3	-1.09	LINC00877
1.28	-1.06	CCZ1
1.28	-1.06	N4BP2L2
1.28	-1.07	HNRNPH1
1.27	-1.06	SNX3
1.27	-1.06	VMP1
1.26	-1.05	ATP6AP2
1.26	-1.05	SCO2
1.25	-1.04	APOBEC3C
1.24	-1.03	CYBA
1.23	-1.02	LSM6
1.23	-1.03	MGST2
1.22	-1.02	ARF6
1.22	-1.01	POLR2L
1.22	-1.02	EIF3E
1.21	-1.01	SEC61G
1.19	-0.996	LYPLA1
1.18	-0.985	CD47
1.18	-0.98	COX19
1.14	-0.958	H2AFZ
1.14	-0.947	ATP6V1G1
1.13	-0.94	PGK1
1.13	-0.931	CYSLTR1
1.12	-0.941	MRPL23
1.11	-0.924	VPS29
1.11	-0.92	VAMP5
1.1	-0.922	NDUFS6
1.09	-0.91	PTEN
1.09	-0.906	OGFRL1
1.09	-0.905	HLA-DQB1
1.09	-0.907	MZT2B
1.09	-0.903	METTL7A
1.08	-0.899	LY96
1.08	-0.897	RANBP1
1.07	-0.892	POLE4
1.07	-0.886	RTN4
1.06	-0.877	CAMLG
1.06	-0.887	TIPIN
1.06	-0.876	ORMDL1
1.06	-0.884	TIMM13
1.05	-0.875	SNRPE
1.05	-0.87	EGLN2
1.04	-0.868	EAF1
1.03	-0.854	CCNY
1.03	-0.855	GMFB
1.03	-0.85	PSMA2
1.02	-0.846	CDC42
1.02	-0.845	TNFSF13B
1.02	-0.848	GADD45GIP1
1.02	-0.85	SSR1
1.02	-0.844	SNF8
1.02	-0.853	GPR85
1.02	-0.855	CLEC2D
1.01	-0.842	SDCBP
1.01	-0.846	CCR2
1.01	-0.849	CCDC66
0.996	-0.828	SUMO2
0.99	-0.824	BLOC1S2
0.988	-0.823	IMP3
0.98	-0.822	GABPB1
0.98	-0.816	HLA-DRB5
0.976	-0.814	AP1S2
0.971	-0.814	EVI2A
0.971	-0.8	HSD17B11
0.966	-0.798	GTF2H5
0.958	-0.798	SORL1
0.956	-0.803	CSF1R
0.954	-0.791	TMEM126A
0.953	-0.789	UBE2W
0.939	-0.783	FAM120A
0.939	-0.785	CYP1B1
0.937	-0.782	MED28
0.903	-0.75	CD300E
0.895	-0.745	RASSF3
0.895	-0.736	HHEX
0.894	-0.743	RAB18
0.894	-0.744	LYZ
0.892	-0.734	SPTSSA
0.883	-0.735	UQCRB
0.879	-0.732	OAZ2
0.876	-0.729	CASP1
0.874	-0.727	MPEG1
0.865	-0.719	MCL1
0.858	-0.713	LTA4H
0.855	-0.713	PTGER2
0.851	-0.711	VKORC1
0.849	-0.705	NEDD8
0.849	-0.711	NHSL2
0.848	-0.706	PLP2
0.848	-0.704	OAZ1
0.84	-0.697	RNASE6
0.836	-0.695	TMEM59
0.832	-0.697	S100A9
0.826	-0.69	CHMP4A
0.814	-0.68	NDUFC2
0.81	-0.68	CSTA
0.809	-0.673	CD36
0.802	-0.676	CCNDBP1
0.8	-0.671	TMEM167A
0.792	-0.657	ATP1B3
0.788	-0.659	S100A12
0.787	-0.656	ZNF302
0.785	-0.659	COX7C
0.785	-0.657	ZC3H15
0.78	-0.649	CAMTA1
0.771	-0.637	BASP1
0.766	-0.648	COX7A2
0.765	-0.634	ZC3H11A
0.76	-0.629	UBA52
0.758	-0.624	PPP1CB
0.757	-0.634	MRPL20
0.755	-0.63	MOB1A
0.746	-0.621	PSMA4
0.733	-0.605	HSPA5
0.731	-0.617	MGST1
0.725	-0.597	IFRD1
0.721	-0.608	SUMO1
0.717	-0.597	SPG7
0.71	-0.585	FAM198B
0.708	-0.587	GPR65
0.699	-0.587	EVI2B
0.693	-0.574	TMEM259
0.691	-0.575	PTGS2
0.685	-0.569	PYURF
0.679	-0.557	EIF4EBP2
0.678	-0.569	FBXW7
0.675	-0.564	ZFAND6
0.671	-0.559	CDC42EP3
0.665	-0.551	RAD23A
0.66	-0.553	SPEN
0.657	-0.549	PSMB7
0.653	-0.54	EEA1
0.652	-0.549	IGKC
0.648	-0.535	DPM1
0.647	-0.544	ESD
0.646	-0.54	NR1H2
0.646	-0.533	PLIN2
0.637	-0.523	NUP58
0.637	-0.534	MRPL33
0.635	-0.538	EIF3M
0.635	-0.528	NDUFB5
0.632	-0.524	GDI2
0.629	-0.521	IVNS1ABP
0.627	-0.514	GNAQ
0.611	-0.512	SET
0.61	-0.51	COX14
0.607	-0.513	LST1
0.607	-0.505	PSMA1
0.606	-0.508	GOLGA4
0.604	-0.499	NEAT1
0.604	-0.502	SLC25A3
0.601	-0.497	LAPTM4A
0.597	-0.494	YIPF4
0.591	-0.495	NPC2
0.588	-0.49	MYOF
0.585	-0.49	SKP1
0.579	-0.483	PHACTR1
0.578	-0.473	MSRB1
0.577	-0.48	GABARAPL2
0.569	-0.477	SUPT4H1
0.565	-0.467	SLC2A6
0.564	-0.466	UBE2E2
0.56	-0.463	PFDN5
0.56	-0.467	TRA2B
0.557	-0.462	NDUFB1
0.551	-0.454	RASGRP2
0.549	-0.461	TPGS1
0.548	-0.454	PCM1
0.545	-0.457	LDLR
0.537	-0.448	PKN1
0.536	-0.445	CALCOCO2
0.529	-0.443	RSL24D1
0.522	-0.43	GIMAP6
0.517	-0.423	CLK1
0.515	-0.427	GPX4
0.515	-0.428	UQCRC2
0.514	-0.423	ARPC1A
0.511	-0.425	ARPC4
0.51	-0.423	CD52
0.506	-0.419	AP2S1
0.504	-0.418	TAF1D
0.5	-0.414	C6orf48
0.5	-0.414	HBA2
0.497	-0.411	GCA
0.496	-0.416	DPEP2
0.496	-0.416	PARL
0.493	-0.41	HBB
0.492	-0.408	BHLHE40
0.491	-0.403	ATP1A1
0.491	-0.4	LSM3
0.49	-0.413	SELL
0.489	-0.412	SSU72
0.485	-0.402	CD93
0.484	-0.407	RUNX3
0.484	-0.406	COMMD6
0.482	-0.396	EMP3
0.482	-0.401	HINT1
0.482	-0.405	NDUFB7
0.478	-0.393	C6orf62
0.478	-0.399	ANKRD12
0.477	-0.401	VAMP8
0.475	-0.395	SLC9A3R1
0.468	-0.392	CDKN2D
0.466	-0.389	SRP9
0.465	-0.388	SCAMP4
0.464	-0.384	CHMP1B
0.464	-0.389	TMBIM4
0.461	-0.384	CNIH1
0.461	-0.38	NAP1L1
0.46	-0.38	CCNL1
0.458	-0.38	SNRPG
0.457	-0.38	IFNGR2
0.455	-0.381	SOD2
0.455	-0.381	CTSA
0.452	-0.37	HLA-G
0.446	-0.365	ABHD5
0.445	-0.366	EIF2S3
0.444	-0.367	HNRNPF
0.443	-0.368	OSTF1
0.442	-0.363	GLIPR1
0.441	-0.363	EIF4A2
0.439	-0.37	PAPSS2
0.437	-0.365	OST4
0.429	-0.359	PPP1CC
0.425	-0.352	SPCS1
0.424	-0.345	LSM1
0.423	-0.349	FBXW11
0.414	-0.341	EIF3L
0.413	-0.344	PDIA6
0.411	-0.342	TOMM22
0.411	-0.341	SNRPB2
0.411	-0.334	EDF1
0.409	-0.34	DYNLL1
0.401	-0.333	SPCS2
0.398	-0.331	HLA-DPB1
0.396	-0.321	KCTD12
0.39	-0.325	DPY30
0.389	-0.316	PPP1R15B
0.386	-0.325	RBM39
0.385	-0.327	CD63
0.384	-0.322	FKBP1A
0.381	-0.321	METTL9
0.377	-0.316	ZNF703
0.37	-0.316	NR3C1
0.369	-0.305	DNM2
0.367	-0.313	TBC1D7
0.366	-0.307	ZFAS1
0.364	-0.305	AP5B1
0.364	-0.305	MNT
0.364	-0.303	TMEM243
0.362	-0.301	AP3S1
0.356	-0.294	ROCK1
0.352	-0.291	ATP6V1B2
0.352	-0.289	SNW1
0.351	-0.296	SH3TC1
0.347	-0.288	PXN
0.34	-0.287	ZNF267
0.339	-0.28	SCPEP1
0.334	-0.28	POLR2B
0.334	-0.271	IFI6
0.332	-0.274	ICAM1
0.332	-0.274	IL1B
0.331	-0.272	MRPL12
0.325	-0.272	PABPC4
0.323	-0.269	COMMD8
0.321	-0.262	TUFM
0.32	-0.261	FGL2
0.319	-0.27	LGALS2
0.318	-0.266	LAMTOR2
0.311	-0.256	ERH
0.309	-0.255	HLA-DRA
0.306	-0.252	RC3H1
0.301	-0.247	FNIP1
0.298	-0.255	AC007952.4
0.297	-0.248	NUB1
0.297	-0.246	NDUFS8
0.292	-0.245	EIF6
0.292	-0.249	SEC11A
0.291	-0.242	ARL4A
0.287	-0.238	UBAC2
0.286	-0.236	ZFAND5
0.286	-0.236	GRN
0.282	-0.235	DNAJA1
0.278	-0.225	RSRC2
0.271	-0.22	CLNS1A
0.27	-0.231	BRK1
0.269	-0.226	RRP12
0.266	-0.223	ARHGAP27
0.264	-0.217	MAN2C1
0.264	-0.222	DHRS4L2
0.264	-0.215	IL10RB
0.264	-0.215	MRPS21
0.263	-0.211	SLC43A2
0.26	-0.221	SCP2
0.257	-0.212	SRSF11
0.256	-0.218	JAK2
0.256	-0.209	PLK3
0.253	-0.205	TNFAIP3
0.252	-0.212	BCLAF1
0.249	-0.213	FGR
0.238	-0.194	HPS1
0.235	-0.202	FCGR3A
0.234	-0.191	PLEKHM1
0.233	-0.199	GLRX
0.233	-0.204	AKAP13
0.23	-0.191	SAMSN1
0.228	-0.19	CAPN7
0.228	-0.194	HNRNPDL
0.223	-0.183	LAP3
0.222	-0.183	AKNA
0.221	-0.185	TOB1
0.216	-0.178	PTBP1
0.216	-0.183	DYNLT1
0.214	-0.176	SRSF7
0.214	-0.181	ATP6V0E1
0.213	-0.177	SF3B6
0.207	-0.165	SRPRA
0.207	-0.173	POU2F2
0.206	-0.173	TIPARP
0.206	-0.173	ATP6V1A
0.204	-0.166	WSB1
0.204	-0.169	CSF2RA
0.203	-0.168	AMPD2
0.201	-0.167	PTGER4
0.201	-0.171	CD48
0.192	-0.157	LITAF
0.191	-0.157	NCF2
0.191	-0.163	UBXN4
0.187	-0.158	BCL3
0.187	-0.154	SLC15A3
0.186	-0.157	STK10
0.185	-0.156	SH3BP1
0.184	-0.147	SLC25A6
0.183	-0.161	ADGRE5
0.182	-0.147	SELPLG
0.182	-0.156	PSME2
0.179	-0.147	CX3CR1
0.179	-0.153	G0S2
0.176	-0.138	NUDT3
0.17	-0.138	PLXDC2
0.17	-0.142	IKZF1
0.169	-0.135	MARCKSL1
0.168	-0.138	DDX24
0.165	-0.131	ZNFX1
0.162	-0.132	TAOK3
0.158	-0.137	CFD
0.158	-0.131	GIMAP2
0.157	-0.133	LY6E
0.156	-0.132	GRK6
0.156	-0.125	APRT
0.156	-0.13	ISG15
0.155	-0.131	ATXN7L3B
0.154	-0.125	CCNH
0.154	-0.126	OSTC
0.152	-0.127	PSMC6
0.146	-0.115	CNOT7
0.145	-0.115	NUFIP2
0.142	-0.12	ARPC2
0.142	-0.115	RAB31
0.14	-0.114	H2AFJ
0.139	-0.112	FOSL2
0.136	-0.109	HERPUD1
0.136	-0.116	SRSF10
0.135	-0.109	EEF1B2
0.133	-0.109	TIMP1
0.133	-0.112	COMMD7
0.132	-0.115	CLTB
0.13	-0.101	SHISA5
0.129	-0.0973	WDR45B
0.126	-0.103	CTSD
0.126	-0.0991	GUSB
0.124	-0.0945	ABCA1
0.123	-0.0958	MLF2
0.123	-0.102	IFI16
0.122	-0.0991	MBNL1
0.12	-0.103	POLR2K
0.12	-0.0988	RNF187
0.119	-0.0997	COX6A1
0.119	-0.0973	SBDS
0.117	-0.105	COX7A2L
0.115	-0.0866	PSIP1
0.112	-0.0937	EIF3F
0.11	-0.0941	NINJ1
0.108	-0.0937	PRDX3
0.108	-0.0866	EIF5
0.107	-0.0878	TCF25
0.107	-0.0884	EIF3D
0.106	-0.0939	TMED2
0.102	-0.0815	GSAP
0.101	-0.0774	C15orf39
0.0993	-0.0829	GIMAP7
0.0963	-0.0801	UQCRH
0.0934	-0.0796	EEF1A1
0.0928	-0.0723	ICAM3
0.0899	-0.0702	GLUD1
0.0894	-0.0752	SFT2D1
0.0873	-0.0683	RIPK2
0.0856	-0.076	TNFRSF14
0.0835	-0.0701	SLC7A7
0.0809	-0.0701	EPC1
0.0809	-0.063	EIF1AX
0.0785	-0.0623	SYAP1
0.0784	-0.0637	IAH1
0.078	-0.0648	SKIL
0.0769	-0.0588	CUTA
0.0761	-0.0683	YPEL2
0.0746	-0.0618	SPG21
0.0701	-0.0563	RHOG
0.0693	-0.0596	YWHAH
0.0679	-0.0629	NAPA
0.0661	-0.0505	CDK2AP2
0.0658	-0.0531	KLF6
0.0615	-0.0499	EP300
0.0554	-0.0441	JMJD1C
0.0549	-0.0486	TBXAS1
0.0534	-0.0474	PLEKHO1
0.0525	-0.0386	TMEM9B
0.0508	-0.0426	SF1
0.0504	-0.0455	CD14
0.05	-0.0402	BRD4
0.0482	-0.0357	AP1B1
0.0476	-0.0402	DENND4B
0.0474	-0.0424	MARCKS
0.0456	-0.0386	MX1
0.0456	-0.034	PTK2B
0.0432	-0.0365	DDX3X
0.041	-0.0376	TMEM230
0.0402	-0.0325	IER5
0.0397	-0.029	PLAC8
0.0345	-0.029	GAK
0.0318	-0.031	HACD4
0.0304	-0.0224	SRSF4
0.029	-0.0209	ATG2A
0.0286	-0.0208	SGK1
0.0254	-0.0222	SS18L2
0.0253	-0.0159	RHEB
0.0252	-0.027	MS4A6A
0.0237	-0.0208	FLII
0.0228	-0.0236	FGD3
0.021	-0.0186	WARS
0.0195	-0.0106	CCNL2
0.0184	-0.0141	SERPINB1
0.017	-0.015	TIMM8B
0.0156	-0.0117	SNX6
0.013	-0.00806	MYL12A
0.0129	-0.0152	PRPF8
0.0123	-0.0118	LGALS9
0.0112	-0.00574	CTNNB1
0.0106	-0.011	ARHGAP9
0.0101	-0.00337	YPEL5
0.00977	-0.00756	SIPA1L1
0.00802	-0.00912	HOOK3
0.00741	-0.0102	NRG1
0.00517	-0.00168	TNFRSF1A
0.00376	-0.00378	SLC9A8
0.000707	-0.000787	PSTPIP2
0.000225	0.00162	HOTAIRM1
-0.000171	-0.000919	DENND3
-0.00021	-0.00257	CFLAR
-0.000293	0.000824	MYO9B
-0.000462	-0.00348	CSNK2A1
-0.00121	0.00518	SH3BP5
-0.00775	0.0143	NHLRC3
-0.0104	0.00359	DHRS4
-0.0141	0.0129	PNP
-0.0152	0.00964	CHP1
-0.0167	0.0116	P4HB
-0.018	0.012	ACAP2
-0.0183	0.0213	BTG2
-0.0187	0.0194	INSIG1
-0.0235	0.0253	INPPL1
-0.025	0.019	MYO1F
-0.0264	0.0187	HCK
-0.0269	0.0227	SRA1
-0.0284	0.0263	BRD2
-0.0296	0.0263	UBE2L6
-0.0305	0.0285	SUB1
-0.0312	0.0285	AFG3L2
-0.0318	0.0342	MED29
-0.0356	0.0277	RAB11B
-0.0382	0.0317	MRPL51
-0.0393	0.0334	NOTCH2NL
-0.0406	0.0355	GCC2
-0.0424	0.037	SHOC2
-0.0426	0.0394	RPSA
-0.0427	0.0336	SSR2
-0.0429	0.0342	CAB39
-0.0442	0.037	SZRD1
-0.0451	0.0355	IDS
-0.0535	0.0467	IFITM1
-0.055	0.0473	SMCHD1
-0.0568	0.0478	PAFAH1B1
-0.057	0.0497	CEP170
-0.0573	0.0491	CHD3
-0.0573	0.0437	RASGEF1B
-0.0579	0.0441	CYTIP
-0.0584	0.0436	TOMM7
-0.0599	0.0508	INPP5D
-0.0602	0.0466	KLF10
-0.0604	0.0483	OTUD1
-0.062	0.0474	ERICH1
-0.0632	0.0526	HNRNPH2
-0.0654	0.0571	FRY
-0.0658	0.0536	LAMTOR5
-0.068	0.0599	COLGALT1
-0.069	0.0514	RHOB
-0.0695	0.0616	MIR22HG
-0.0717	0.0681	CWC25
-0.0727	0.0622	NFIL3
-0.0749	0.0661	SP100
-0.0792	0.0693	ID1
-0.0797	0.0671	DUSP2
-0.0804	0.0697	CHRAC1
-0.0885	0.0703	FAM32A
-0.09	0.0847	PDAP1
-0.0906	0.077	ARID1B
-0.095	0.0833	NKTR
-0.0955	0.0835	NAMPT
-0.0957	0.0797	SIAH2
-0.0975	0.0843	MAP7D1
-0.0978	0.0829	NFKBIA
-0.0998	0.0855	QPCT
-0.101	0.0884	LRRFIP2
-0.102	0.0927	IL10RA
-0.103	0.0876	NFKBID
-0.104	0.089	TOP1
-0.104	0.0786	RAB11FIP1
-0.11	0.0858	KLF2
-0.11	0.0915	EML4
-0.111	0.0913	H3F3A
-0.113	0.0906	STX11
-0.113	0.101	CXCL2
-0.114	0.0917	RAB2A
-0.114	0.0963	CKLF
-0.115	0.101	SNHG15
-0.115	0.0971	TRA2A
-0.118	0.0926	IFITM3
-0.12	0.105	ANXA1
-0.121	0.105	SRRM1
-0.121	0.103	MAPK6
-0.122	0.105	PPA1
-0.124	0.108	PRKAG2
-0.124	0.108	CNOT1
-0.126	0.103	ZZEF1
-0.127	0.107	FTH1
-0.128	0.102	CDKN1C
-0.13	0.0944	NDUFA4
-0.133	0.109	CLTA
-0.135	0.114	ATF3
-0.137	0.116	SNHG9
-0.137	0.121	GK
-0.139	0.116	PNRC1
-0.144	0.122	PFKFB3
-0.144	0.12	CCT8
-0.145	0.127	CDK5RAP3
-0.151	0.124	LIPA
-0.151	0.129	NDRG1
-0.151	0.124	DNTTIP2
-0.153	0.126	PIK3R5
-0.153	0.131	SLC8A1
-0.157	0.129	BTF3
-0.157	0.132	YBX1
-0.157	0.126	KLF4
-0.159	0.131	GOLGB1
-0.159	0.136	GPI
-0.161	0.145	CNPY2
-0.163	0.133	GNG2
-0.163	0.134	KMT2E
-0.163	0.138	LIMD2
-0.165	0.141	NDUFV3
-0.166	0.135	HK1
-0.169	0.144	OGFR
-0.172	0.142	PRKCD
-0.172	0.141	PSMB8-AS1
-0.176	0.149	ALOX5
-0.176	0.147	PF4
-0.178	0.149	PELI1
-0.188	0.155	IFITM2
-0.19	0.151	TCF7L2
-0.192	0.161	TMEM107
-0.192	0.156	YWHAZ
-0.193	0.16	NLRC5
-0.194	0.165	HNMT
-0.194	0.162	HNRNPA1
-0.194	0.156	CITED2
-0.195	0.159	RNF19A
-0.197	0.163	XAF1
-0.199	0.173	RAB20
-0.2	0.158	VPS4B
-0.201	0.167	UBE2J1
-0.204	0.171	TNFRSF1B
-0.205	0.178	EHBP1L1
-0.206	0.171	COX7B
-0.207	0.175	HNRNPL
-0.207	0.171	DHRSX
-0.21	0.174	AKIRIN2
-0.211	0.179	IPMK
-0.212	0.177	KIF2A
-0.215	0.173	ARL6IP4
-0.219	0.182	PLSCR1
-0.22	0.187	TMX4
-0.221	0.18	MARCO
-0.225	0.192	STK38
-0.225	0.191	CCL3
-0.225	0.189	ARHGEF40
-0.225	0.18	PTPN1
-0.227	0.194	UBXN11
-0.229	0.192	NSA2
-0.232	0.19	RAP1A
-0.233	0.196	P2RX4
-0.235	0.196	MCTP1
-0.236	0.199	CCDC69
-0.238	0.196	APOBR
-0.241	0.204	EFCAB2
-0.241	0.203	TBC1D5
-0.243	0.207	EPN1
-0.244	0.207	IRF5
-0.245	0.201	HMOX1
-0.245	0.207	KIAA1109
-0.248	0.206	PPP1R12A
-0.249	0.206	TMSB10
-0.25	0.21	MYO1G
-0.251	0.207	KCNAB2
-0.252	0.21	TMEM70
-0.252	0.207	OAS1
-0.253	0.204	CD300LF
-0.254	0.215	APOBEC3A
-0.257	0.213	GADD45B
-0.265	0.221	FLOT1
-0.265	0.22	S100A11
-0.267	0.229	MEF2D
-0.269	0.224	GAS7
-0.269	0.23	PREX1
-0.27	0.223	ARL4C
-0.271	0.23	EIF3J
-0.274	0.229	SIN3B
-0.275	0.231	BNIP2
-0.275	0.221	MX2
-0.276	0.235	SFSWAP
-0.28	0.23	DDIT3
-0.28	0.239	TGFB1
-0.281	0.244	NMT1
-0.282	0.23	CDKN1A
-0.283	0.233	DRAP1
-0.284	0.245	ID2
-0.284	0.237	MAP3K7CL
-0.292	0.249	CCDC88B
-0.293	0.243	OS9
-0.295	0.248	CSRNP1
-0.295	0.244	TOMM5
-0.299	0.245	EZR
-0.302	0.253	ANP32A
-0.303	0.26	TESC
-0.303	0.257	ITM2B
-0.304	0.252	HP1BP3
-0.304	0.242	LYN
-0.305	0.253	OGDH
-0.307	0.254	STAT3
-0.309	0.254	SEC13
-0.312	0.259	CSTB
-0.314	0.256	CDK12
-0.315	0.262	CXCL16
-0.316	0.263	HLA-DQA1
-0.316	0.256	HEBP2
-0.317	0.271	DMXL2
-0.319	0.267	SLC25A13
-0.32	0.272	ZFP36L1
-0.321	0.265	COMMD3
-0.325	0.271	GABARAPL1
-0.326	0.276	EHD4
-0.33	0.268	SUMO3
-0.332	0.282	NENF
-0.333	0.281	ZFAND3
-0.333	0.287	IER3
-0.334	0.274	USP15
-0.334	0.28	NXT1
-0.338	0.276	DDX3Y
-0.339	0.277	CENPC
-0.34	0.278	GRASP
-0.341	0.285	CASC3
-0.341	0.283	RARA
-0.342	0.284	SIRPB1
-0.342	0.287	PTPN2
-0.344	0.281	EHMT1
-0.345	0.287	ARIH2
-0.345	0.286	PECAM1
-0.348	0.294	CTSH
-0.348	0.291	MID1IP1
-0.349	0.284	OSER1
-0.349	0.289	ZC3H18
-0.349	0.295	SNX18
-0.35	0.29	SCLT1
-0.351	0.291	ELL
-0.351	0.283	SMCO4
-0.353	0.299	CYTH1
-0.353	0.301	ITPRIP
-0.354	0.299	USP3
-0.355	0.295	LILRB1
-0.356	0.302	C9orf78
-0.357	0.304	MXD1
-0.357	0.298	PHF11
-0.357	0.298	MBP
-0.358	0.294	PET100
-0.359	0.295	ARAP2
-0.36	0.302	NFKBIB
-0.363	0.297	NDE1
-0.363	0.307	EMILIN2
-0.369	0.304	ZRSR2
-0.37	0.31	TLE3
-0.373	0.31	ITGAX
-0.374	0.312	WASF2
-0.376	0.315	SAT1
-0.378	0.313	IRF1
-0.379	0.313	RNF213
-0.38	0.311	ARF1
-0.38	0.314	AFF4
-0.385	0.321	SMAP1
-0.386	0.319	GTF2F1
-0.386	0.327	PGS1
-0.387	0.326	RILPL2
-0.387	0.322	CIAO1
-0.388	0.327	IER2
-0.392	0.326	PDE4B
-0.393	0.325	DCAF8
-0.399	0.335	C12orf57
-0.4	0.331	MAFB
-0.4	0.336	UNC13D
-0.404	0.337	PCIF1
-0.405	0.335	SAFB
-0.406	0.344	RSRP1
-0.412	0.351	RNF166
-0.413	0.352	NCF1
-0.413	0.341	TUBGCP2
-0.413	0.345	ZBTB7A
-0.413	0.346	CHURC1
-0.414	0.343	BCL7B
-0.414	0.348	NFKB2
-0.416	0.348	DDX21
-0.416	0.346	PAK1
-0.416	0.35	MAP3K8
-0.418	0.35	AES
-0.418	0.349	SRSF5
-0.418	0.349	ZFHX3
-0.419	0.357	AKAP17A
-0.42	0.351	TAGLN2
-0.421	0.356	ARL6IP1
-0.423	0.355	CSK
-0.424	0.353	BTG1
-0.424	0.352	RNF13
-0.429	0.359	YME1L1
-0.432	0.362	ADK
-0.433	0.361	ARRDC3
-0.435	0.356	FUS
-0.437	0.359	LDHB
-0.437	0.367	CD55
-0.442	0.372	TTC7A
-0.444	0.368	NUP98
-0.447	0.374	PHF21A
-0.449	0.378	BRI3
-0.452	0.381	USP4
-0.453	0.376	SULF2
-0.454	0.373	GSK3B
-0.455	0.377	IK
-0.456	0.383	UTY
-0.46	0.388	SH3BP2
-0.46	0.378	VPS13C
-0.461	0.385	SUPT6H
-0.461	0.384	CDC37
-0.464	0.396	DOCK2
-0.466	0.389	EFHD2
-0.47	0.389	RBM33
-0.471	0.391	PPP1R10
-0.471	0.386	DIP2A
-0.474	0.398	TXNIP
-0.476	0.4	POLR2A
-0.476	0.399	NLRP3
-0.477	0.4	LSP1
-0.485	0.404	NRDC
-0.487	0.407	DBI
-0.488	0.41	AHNAK
-0.489	0.412	MYH9
-0.49	0.406	OXSR1
-0.493	0.412	RBM4
-0.495	0.415	DENND1A
-0.5	0.419	CD46
-0.5	0.421	CBWD2
-0.501	0.415	CHD1
-0.502	0.419	SRGAP2
-0.503	0.414	MCOLN1
-0.504	0.423	RGCC
-0.506	0.424	PA2G4
-0.506	0.423	PAK2
-0.507	0.426	CXCL8
-0.508	0.427	FAM50A
-0.511	0.432	S100A8
-0.511	0.422	YTHDC1
-0.514	0.425	HM13
-0.516	0.425	ZEB2
-0.519	0.434	SPSB3
-0.52	0.428	TBC1D8
-0.524	0.437	RELT
-0.525	0.432	NEU1
-0.526	0.435	H3F3B
-0.527	0.44	RNMT
-0.527	0.438	NDUFC1
-0.528	0.44	KTN1
-0.528	0.444	PGD
-0.529	0.435	TSPAN14
-0.53	0.445	BRD9
-0.533	0.439	ITGA4
-0.535	0.446	PTP4A1
-0.536	0.449	RB1CC1
-0.537	0.452	ZEB2-AS1
-0.539	0.451	WDR74
-0.542	0.452	RCSD1
-0.543	0.45	GLUL
-0.547	0.455	LAPTM5
-0.547	0.454	TCEA1
-0.55	0.457	BOD1L1
-0.551	0.466	NPM1
-0.555	0.46	LRRFIP1
-0.555	0.466	PTCH2
-0.555	0.465	HNRNPAB
-0.556	0.459	BTAF1
-0.556	0.465	UBC
-0.557	0.468	NEDD9
-0.558	0.458	CTSL
-0.559	0.467	CNTLN
-0.561	0.465	WDR43
-0.563	0.471	GPR183
-0.566	0.465	CRIP1
-0.567	0.479	PRRC2C
-0.567	0.47	PPBP
-0.568	0.476	TPR
-0.57	0.472	NUP214
-0.57	0.474	ARHGAP4
-0.57	0.479	NIPBL
-0.571	0.48	ITSN2
-0.572	0.469	SLC38A10
-0.574	0.482	GTF2A2
-0.575	0.479	SQSTM1
-0.576	0.485	DIAPH2
-0.576	0.484	HGS
-0.577	0.482	TPM4
-0.577	0.479	MYADM
-0.578	0.484	ADAM10
-0.579	0.483	HCAR3
-0.583	0.487	NDUFA1
-0.584	0.488	CHD4
-0.585	0.484	GPCPD1
-0.588	0.493	TGFBR2
-0.589	0.496	RNH1
-0.59	0.487	ACIN1
-0.59	0.496	ROMO1
-0.593	0.49	KDM6B
-0.596	0.499	SERTAD2
-0.599	0.501	LRP1
-0.6	0.499	MIS18BP1
-0.601	0.501	PRMT2
-0.604	0.508	LILRB3
-0.605	0.504	REL
-0.606	0.503	PHF3
-0.607	0.505	FAM110A
-0.609	0.507	RNF114
-0.61	0.505	HSPA1B
-0.611	0.506	TRPC4AP
-0.611	0.502	RBM42
-0.611	0.512	SON
-0.612	0.508	ODC1
-0.613	0.503	STXBP2
-0.614	0.511	ITPK1
-0.618	0.515	TRIB1
-0.618	0.52	CSNK1D
-0.619	0.516	ZFP36L2
-0.62	0.519	RAB8A
-0.621	0.514	CHST15
-0.623	0.517	JMJD6
-0.625	0.52	EMD
-0.625	0.521	NLRP1
-0.625	0.523	ARHGDIA
-0.626	0.527	LENG8
-0.626	0.518	C18orf32
-0.627	0.523	HMGN2
-0.627	0.525	CYB5R3
-0.628	0.533	GRIPAP1
-0.628	0.524	MICU1
-0.629	0.525	DUSP1
-0.63	0.524	ARRB2
-0.631	0.531	MAP3K3
-0.631	0.522	AKAP9
-0.634	0.527	RBM17
-0.641	0.534	PKN2
-0.642	0.534	POLR1D
-0.642	0.53	WBP2
-0.643	0.534	TUBA1A
-0.645	0.539	PRRC2A
-0.646	0.535	TMC6
-0.65	0.54	PLEKHG2
-0.652	0.539	JAK1
-0.655	0.55	CARD9
-0.656	0.546	SARNP
-0.66	0.546	VASP
-0.661	0.548	VPS36
-0.663	0.548	PIK3R1
-0.663	0.557	MYD88
-0.666	0.55	HIST2H2AA4
-0.666	0.56	DDIT4
-0.668	0.555	SPATA13
-0.669	0.554	FCAR
-0.673	0.563	SMNDC1
-0.674	0.568	SOCS3
-0.674	0.566	SLC25A37
-0.676	0.563	DNAJC15
-0.676	0.554	C8orf59
-0.682	0.58	TBRG1
-0.683	0.559	TYK2
-0.683	0.572	MECP2
-0.683	0.566	NFKBIZ
-0.684	0.571	SPAG9
-0.688	0.574	NADK
-0.689	0.58	TAGAP
-0.69	0.58	EWSR1
-0.691	0.579	TPT1
-0.694	0.57	PRR13
-0.697	0.581	DNAJB1
-0.699	0.578	ZFR
-0.699	0.582	SUPT5H
-0.7	0.585	TLN1
-0.701	0.589	USF2
-0.703	0.586	SUN2
-0.707	0.587	MGRN1
-0.708	0.59	ARL8B
-0.709	0.586	PSMB10
-0.713	0.597	RAP1GAP2
-0.717	0.589	ZDHHC1
-0.717	0.6	SEC14L1
-0.717	0.596	RASSF5
-0.719	0.601	VCP
-0.722	0.605	DAPK1
-0.727	0.609	TBC1D22A
-0.729	0.61	PMF1
-0.73	0.608	DEK
-0.735	0.618	PTOV1
-0.735	0.608	PFDN1
-0.737	0.62	EIF4G1
-0.737	0.617	OTUB1
-0.739	0.619	NAP1L4
-0.74	0.622	IL17RA
-0.741	0.617	NFIC
-0.741	0.618	LINC00937
-0.742	0.613	LUCAT1
-0.743	0.617	PTPN6
-0.743	0.621	RAB1B
-0.749	0.617	UBN1
-0.749	0.629	TLK1
-0.75	0.626	ITGAL
-0.75	0.625	S100A10
-0.754	0.622	BCL6
-0.754	0.625	TALDO1
-0.755	0.63	IQGAP1
-0.757	0.634	TNFSF13
-0.757	0.64	CXCR4
-0.76	0.639	CDK11A
-0.761	0.64	TACC1
-0.764	0.635	VIM
-0.77	0.642	EIF4B
-0.772	0.654	NABP1
-0.772	0.646	RRBP1
-0.775	0.651	CHD2
-0.776	0.652	EIF4A1
-0.776	0.649	GMIP
-0.776	0.646	MAP1LC3B
-0.777	0.646	NUCKS1
-0.778	0.646	ITGA5
-0.781	0.655	CD300LB
-0.784	0.655	PRPF6
-0.786	0.661	MARK2
-0.789	0.657	PPIA
-0.796	0.67	EREG
-0.796	0.669	VPS37B
-0.797	0.66	SNRPA
-0.799	0.659	C4orf48
-0.801	0.655	RAP1B
-0.801	0.67	DGKD
-0.804	0.668	GNG5
-0.805	0.673	TREM1
-0.806	0.675	CLASRP
-0.809	0.677	TAPBP
-0.81	0.669	C11orf98
-0.81	0.668	RAB14
-0.811	0.677	SMARCC2
-0.812	0.677	SETD2
-0.814	0.685	GNAI2
-0.82	0.684	EIF5A
-0.825	0.687	LGALS3
-0.826	0.686	ETS2
-0.826	0.688	DIAPH1
-0.826	0.686	ELF2
-0.83	0.696	MED15
-0.831	0.693	SH2D3C
-0.831	0.694	HK3
-0.833	0.693	RB1
-0.833	0.695	RLIM
-0.833	0.686	RHBDF2
-0.834	0.703	RIOK3
-0.835	0.696	SRRM2
-0.836	0.699	SAFB2
-0.837	0.702	GNPTG
-0.839	0.703	THEMIS2
-0.842	0.7	CNTRL
-0.844	0.698	UNC119
-0.849	0.712	CLK3
-0.851	0.706	SNX29
-0.851	0.707	CSF3R
-0.856	0.715	SF3A2
-0.858	0.716	AGTPBP1
-0.859	0.718	RBKS
-0.862	0.723	USP22
-0.864	0.718	RNPC3
-0.873	0.725	LCP2
-0.875	0.732	NBPF14
-0.878	0.726	PSME1
-0.879	0.734	ANO6
-0.879	0.738	IRF7
-0.879	0.735	TOM1
-0.879	0.726	HSP90AB1
-0.882	0.731	DGKZ
-0.883	0.741	SASH3
-0.883	0.737	R3HDM4
-0.886	0.739	DDX27
-0.892	0.744	SP110
-0.892	0.747	RANBP2
-0.9	0.75	MIDN
-0.901	0.751	TET2
-0.901	0.751	ST3GAL1
-0.902	0.755	SH3KBP1
-0.903	0.753	PRAM1
-0.904	0.756	ZFC3H1
-0.907	0.754	CIITA
-0.907	0.762	CAPZB
-0.911	0.751	TACC3
-0.911	0.764	FERMT3
-0.911	0.758	ANPEP
-0.912	0.761	PRRC2B
-0.913	0.762	KLF3
-0.913	0.763	NUCB1
-0.913	0.761	TSC22D3
-0.917	0.759	CSNK2B
-0.918	0.759	EIF1AY
-0.922	0.765	CD83
-0.923	0.769	CNN2
-0.925	0.772	SAP30BP
-0.926	0.77	PTTG1IP
-0.927	0.771	SDF4
-0.928	0.774	ZNF394
-0.93	0.778	PARVG
-0.93	0.778	C5AR1
-0.93	0.773	PSMA6
-0.934	0.775	CLIC1
-0.935	0.78	SP3
-0.938	0.773	HSP90AA1
-0.941	0.786	PTPRA
-0.944	0.785	TUBB4B
-0.945	0.792	CDK11B
-0.946	0.785	TKT
-0.946	0.785	SYNGR2
-0.946	0.792	PNPLA2
-0.947	0.786	SYPL1
-0.948	0.798	PPP1R15A
-0.95	0.789	BIN2
-0.952	0.788	GRINA
-0.952	0.789	ASGR2
-0.954	0.796	PPDPF
-0.957	0.792	RBM25
-0.962	0.802	FNBP4
-0.963	0.812	MAN2B1
-0.964	0.8	ANXA5
-0.964	0.804	UCP2
-0.964	0.805	KMT2C
-0.964	0.803	NCOR2
-0.964	0.802	ARAP1
-0.965	0.8	S100Z
-0.967	0.81	GAB2
-0.967	0.801	SMARCA5
-0.968	0.807	APBB1IP
-0.968	0.807	PPP1R9B
-0.968	0.808	LILRB2
-0.97	0.815	TYMP
-0.97	0.813	C19orf38
-0.973	0.807	CBX3
-0.975	0.816	ARRDC1
-0.975	0.808	PIM3
-0.976	0.814	NAIP
-0.976	0.816	ANKRD11
-0.979	0.825	FMNL1
-0.98	0.818	RIN3
-0.984	0.823	TRIM8
-0.986	0.824	NDUFA3
-0.987	0.816	RNF149
-0.99	0.829	GZF1
-0.994	0.833	HLA-C
-0.995	0.829	ACTN4
-0.995	0.823	HLA-E
-0.997	0.826	NR4A1
-0.997	0.835	OSM
-1	0.836	SLC25A36
-1.01	0.836	TAF15
-1.01	0.842	ANKRD13D
-1.01	0.845	CDKN1B
-1.02	0.848	NBPF10
-1.02	0.845	EHD1
-1.02	0.851	RELB
-1.02	0.845	DCTN4
-1.02	0.85	MIF
-1.02	0.852	ZFP36
-1.03	0.856	HPCAL1
-1.03	0.862	GNG11
-1.03	0.861	PIEZO1
-1.03	0.857	ODF3B
-1.03	0.869	PPIF
-1.04	0.866	INO80E
-1.04	0.868	COX16
-1.04	0.859	BDP1
-1.04	0.869	PRPF4B
-1.05	0.88	SPECC1
-1.05	0.868	PILRA
-1.05	0.875	NR4A2
-1.05	0.881	SENP6
-1.06	0.882	MIER1
-1.07	0.894	PPP4R2
-1.07	0.896	SYK
-1.07	0.892	MKNK2
-1.07	0.893	MANBA
-1.07	0.897	PPIB
-1.08	0.903	CD99
-1.08	0.895	JUN
-1.08	0.897	NOL7
-1.08	0.901	NDUFA12
-1.09	0.919	HMGB1
-1.09	0.913	SF3B2
-1.09	0.905	CAST
-1.09	0.907	TMEM176B
-1.09	0.904	FLNA
-1.09	0.91	JUNB
-1.09	0.902	MRPS24
-1.09	0.906	TK2
-1.09	0.914	CD74
-1.1	0.917	CCDC88A
-1.11	0.93	MACF1
-1.11	0.922	CST3
-1.11	0.925	SLC3A2
-1.12	0.935	FOSB
-1.12	0.937	PTPRE
-1.12	0.935	CNST
-1.13	0.943	GNG10
-1.13	0.939	COTL1
-1.13	0.935	TAF10
-1.13	0.944	UPP1
-1.14	0.953	STX16
-1.14	0.948	PFDN6
-1.14	0.946	ARHGEF1
-1.15	0.964	STAT6
-1.15	0.962	GAA
-1.15	0.962	RBBP6
-1.15	0.962	ILF3
-1.15	0.964	PSMD9
-1.16	0.969	NXF1
-1.16	0.967	ZNF385A
-1.16	0.97	DDX39B
-1.16	0.976	DAP
-1.16	0.967	SNRNP70
-1.16	0.964	BCL2A1
-1.17	0.979	KMT2E-AS1
-1.18	0.986	COQ7
-1.18	0.98	TMEM176A
-1.18	0.981	HNRNPU
-1.19	0.993	CEBPB
-1.19	0.987	SH3BGRL3
-1.19	0.994	ZMIZ1
-1.2	0.995	THBS1
-1.2	1	RAC1
-1.21	1.01	DYNC1H1
-1.21	1.01	GRB2
-1.21	1.01	HLA-F
-1.22	1.02	MICAL1
-1.22	1.02	UBALD2
-1.22	1.02	ATG16L2
-1.23	1.03	METRNL
-1.23	1.03	ALDH2
-1.23	1.03	MAPK8IP3
-1.24	1.03	MAP2K3
-1.24	1.03	SERPINA1
-1.24	1.04	STK17B
-1.24	1.03	PLEC
-1.25	1.05	CHD8
-1.25	1.04	GNAS
-1.25	1.04	CD302
-1.26	1.05	ULK1
-1.26	1.05	USP48
-1.26	1.05	HCLS1
-1.26	1.06	UBAP1
-1.27	1.06	GM2A
-1.28	1.06	STAT5A
-1.29	1.08	U2AF2
-1.3	1.08	RAC2
-1.31	1.09	HDLBP
-1.31	1.1	MYO15B
-1.32	1.1	NFE2L2
-1.33	1.11	ABCF1
-1.33	1.11	JUND
-1.34	1.12	IFI30
-1.34	1.12	HRH2
-1.34	1.11	GNB2
-1.34	1.11	CUX1
-1.36	1.13	TPM3
-1.37	1.15	SOX4
-1.38	1.15	EEF1G
-1.38	1.16	HNRNPUL1
-1.38	1.15	NDUFA7
-1.38	1.15	SIRPB2
-1.38	1.16	FOS
-1.39	1.16	NCL
-1.39	1.16	RASSF4
-1.39	1.16	RUNX1
-1.4	1.17	CSNK1G2
-1.4	1.16	FAM204A
-1.4	1.17	CLINT1
-1.41	1.17	MAP4K4
-1.41	1.18	RAB24
-1.41	1.18	DPM3
-1.42	1.18	RERE
-1.43	1.19	IGSF6
-1.43	1.19	HBEGF
-1.43	1.2	PRMT9
-1.46	1.22	HIST1H4C
-1.46	1.22	MGAT1
-1.47	1.23	ETV6
-1.47	1.22	FXYD5
-1.47	1.23	UIMC1
-1.47	1.22	OVCA2
-1.49	1.24	TRABD
-1.49	1.24	UVRAG
-1.49	1.24	PLXNB2
-1.51	1.26	DNAJC1
-1.52	1.26	CD68
-1.53	1.27	NPIPB5
-1.54	1.28	RGS2
-1.54	1.29	CALM1
-1.58	1.31	PADI4
-1.58	1.33	PLAUR
-1.59	1.32	PLCB2
-1.59	1.31	TMOD3
-1.61	1.35	SLC2A3
-1.63	1.36	HIF1A
-1.65	1.37	HIST1H1D
-1.69	1.41	ZYX
-1.7	1.42	PPP6R2
-1.7	1.41	PLEK
-1.7	1.42	GABBR1
-1.71	1.43	AAK1
-1.71	1.43	NBPF26
-1.73	1.44	SLC11A1
-1.74	1.45	HIST1H1E
-1.75	1.45	TCIRG1
-1.76	1.47	CEBPD
-1.78	1.49	HIST1H1C
-1.79	1.49	ARF5
-1.8	1.49	TNRC18
-1.85	1.54	H1FX
-1.88	1.57	STAB1
-1.91	1.58	TNFAIP2
-1.94	1.61	KRTCAP2
-1.95	1.63	COMT
-1.98	1.65	ARGLU1
-1.99	1.66	ATXN2L
-2.01	1.67	SPI1
-2.01	1.68	PER1
-2.01	1.67	UBE2V1
-2.03	1.69	RNF145
-2.03	1.69	WAS
-2.05	1.71	KDELR1
-2.05	1.71	ASAH1
-2.08	1.73	POLD4
-2.1	1.75	NME2
-2.18	1.82	CHCHD10
-2.31	1.92	ATP6V0C
-2.56	2.14	TRAPPC5
-2.58	2.15	RNASEK
-3.66	3.05	GABARAP
