# Supplementary material for: Linking COVID-19 to Neurodegeneration: A Single-Cell Deep Learning Study of PBMCs in Multiple Sclerosis and Alzheimer’s Disease
Source: Research Square preprint supplement (doi:10.21203/rs.3.rs-7342199/v1), 2025-10-08
Supplement: Supplementary file 3 [file 547114bd7fcc898cb24a96df.xlsx]

## Sheet: Sheet1
Table3. sorted_data_NK_cell_Covid
Class0	Class1	gene
1.74	-1.82	XIST
1.14	-1.19	AREG
1.09	-1.14	MRPL23
1.08	-1.13	MYL6B
1.02	-1.07	HAUS3
0.983	-1.02	MX1
0.97	-1.01	OASL
0.966	-1.01	PLOD1
0.962	-1	DAPK1
0.95	-0.99	CXCR4
0.942	-0.988	PTPRM
0.898	-0.935	TRGV2
0.883	-0.923	LAIR2
0.846	-0.884	TRAV14DV4
0.822	-0.856	ARL4A
0.813	-0.854	CELF2
0.772	-0.812	JCHAIN
0.763	-0.796	AC012615.1
0.742	-0.776	ISG20L2
0.74	-0.773	TRG-AS1
0.735	-0.769	PER1
0.734	-0.767	ATP9B
0.734	-0.767	TUBA4A
0.733	-0.764	IFI6
0.73	-0.762	SMAD7
0.729	-0.763	RPS4X
0.729	-0.763	TRGC2
0.726	-0.757	TENT5C
0.713	-0.747	IGKV3-20
0.71	-0.738	TCIRG1
0.709	-0.741	TSPO
0.691	-0.721	IGHV3-7
0.682	-0.716	TWSG1
0.682	-0.712	AC020916.1
0.678	-0.703	TRBV4-2
0.674	-0.706	UHRF1BP1L
0.671	-0.702	FBXO44
0.667	-0.697	ZRANB2
0.666	-0.695	RPS10
0.662	-0.695	CBWD1
0.661	-0.69	CCNH
0.66	-0.69	ITPRIP
0.659	-0.686	TNFAIP3
0.658	-0.69	ITGAL
0.656	-0.682	HLA-DQB1
0.654	-0.684	DDIT4
0.653	-0.685	LPCAT1
0.648	-0.672	CTPS1
0.635	-0.668	CLK1
0.622	-0.648	LINC00402
0.607	-0.637	EIF4B
0.602	-0.627	SUPV3L1
0.601	-0.628	SRSF5
0.601	-0.628	SLC1A5
0.597	-0.624	ZRSR2
0.596	-0.624	CLSTN1
0.593	-0.619	ITGB2-AS1
0.591	-0.615	RGCC
0.58	-0.609	TIPARP
0.577	-0.602	ETV3
0.576	-0.601	SAMSN1
0.573	-0.595	SKIV2L
0.569	-0.594	KDM2A
0.567	-0.592	CD83
0.557	-0.579	AC016831.7
0.553	-0.58	UBR1
0.546	-0.572	GRIK4
0.544	-0.568	HLA-DPA1
0.539	-0.563	ARGLU1
0.532	-0.557	IFITM3
0.53	-0.551	JMJD6
0.53	-0.555	SYNE1
0.529	-0.553	FLNA
0.528	-0.552	IFRD1
0.519	-0.543	PBX4
0.515	-0.538	HLA-DRB5
0.513	-0.534	SAFB2
0.51	-0.532	KLRG1
0.508	-0.531	LTBP4
0.508	-0.531	BLOC1S1
0.506	-0.53	ZBTB1
0.504	-0.525	IFI44
0.499	-0.521	RELB
0.495	-0.518	IFI44L
0.493	-0.517	NCL
0.49	-0.512	RPL36A
0.49	-0.513	GAK
0.489	-0.511	KLRC4
0.488	-0.509	SMARCA5
0.487	-0.511	TXNIP
0.486	-0.506	POLR2J3
0.482	-0.507	IGLV8-61
0.481	-0.503	KLRC3
0.478	-0.5	SLC7A5
0.474	-0.494	NR4A2
0.471	-0.494	MKLN1
0.471	-0.492	COG3
0.47	-0.488	CD3G
0.47	-0.49	HBB
0.465	-0.487	RSRP1
0.463	-0.483	RAC2
0.459	-0.482	RRP12
0.451	-0.472	PLCG1
0.436	-0.457	TBKBP1
0.435	-0.456	TTC14
0.435	-0.453	RAP1GAP2
0.434	-0.456	NECAP1
0.434	-0.45	ZDHHC7
0.43	-0.449	ACADVL
0.426	-0.443	RC3H1
0.42	-0.439	TRBC2
0.419	-0.437	HLA-DPB1
0.417	-0.436	KLF10
0.415	-0.433	TSIX
0.414	-0.427	NPIPB5
0.411	-0.428	FAM177A1
0.411	-0.43	OGA
0.409	-0.426	ABCG1
0.409	-0.426	PTMS
0.406	-0.423	ZNF331
0.404	-0.423	NBPF14
0.404	-0.424	ITGAD
0.402	-0.42	CCL4L2
0.402	-0.421	CAPN2
0.401	-0.42	EPSTI1
0.396	-0.413	NIN
0.39	-0.407	ENO2
0.388	-0.406	IQSEC1
0.387	-0.403	KIAA1109
0.384	-0.401	GRASP
0.382	-0.401	SYNE2
0.377	-0.396	ESYT1
0.376	-0.396	DOCK8
0.372	-0.389	DDX3X
0.371	-0.383	TSC22D3
0.367	-0.382	ALAS2
0.364	-0.384	PPDPF
0.36	-0.373	NSF
0.36	-0.378	ZC3HAV1
0.355	-0.373	HLA-C
0.353	-0.372	KIF1B
0.346	-0.359	CSMD1
0.345	-0.359	RNF125
0.34	-0.354	RABGAP1L
0.338	-0.356	IGKV2-30
0.331	-0.35	STAT3
0.33	-0.344	TRAPPC9
0.33	-0.342	IKZF3
0.329	-0.344	CX3CR1
0.316	-0.33	LIME1
0.315	-0.329	RPTOR
0.314	-0.325	TRAV38-1
0.308	-0.322	NR4A3
0.306	-0.321	RNF213
0.305	-0.32	HECTD1
0.304	-0.318	CRY2
0.301	-0.312	NOCT
0.297	-0.313	DDHD1
0.297	-0.31	SLA2
0.297	-0.311	UBC
0.293	-0.307	CD3D
0.292	-0.305	ZFC3H1
0.287	-0.302	TRGV8
0.287	-0.297	RPL18A
0.283	-0.295	ANKRD36B
0.281	-0.295	SLC22A5
0.275	-0.289	PRRC2B
0.275	-0.287	CA1
0.273	-0.284	MSC
0.272	-0.283	ITGAX
0.262	-0.274	NOP58
0.261	-0.268	IDS
0.253	-0.266	RALGAPA1
0.252	-0.263	SPAG9
0.251	-0.259	RPS3
0.25	-0.261	TAPBP
0.247	-0.26	IL32
0.246	-0.258	GSTM1
0.246	-0.258	SLC6A6
0.241	-0.254	RASA3
0.239	-0.252	CYFIP2
0.239	-0.248	HLA-DQA2
0.238	-0.248	VPS53
0.232	-0.243	HLA-DQA1
0.231	-0.246	CEMIP2
0.23	-0.238	IGKV4-1
0.228	-0.24	MACF1
0.225	-0.234	OGT
0.22	-0.228	SYNGR1
0.214	-0.222	GNLY
0.211	-0.219	ATG2A
0.211	-0.219	LILRB1
0.206	-0.218	KDM5C
0.206	-0.217	IFI27
0.204	-0.215	AC006369.1
0.203	-0.211	PTGDS
0.201	-0.211	GLG1
0.201	-0.214	ICAM2
0.199	-0.205	LMNA
0.196	-0.205	RBFOX3
0.193	-0.199	ENC1
0.191	-0.198	LAG3
0.189	-0.195	KMT2C
0.189	-0.197	FCER1G
0.182	-0.188	SUCO
0.179	-0.185	HSP90AA1
0.175	-0.184	SP3
0.172	-0.178	AC068775.1
0.171	-0.183	DDX6
0.171	-0.18	SYTL3
0.154	-0.159	MAT2B
0.146	-0.156	MYH9
0.143	-0.149	TSPYL1
0.142	-0.149	CFL1
0.139	-0.148	USP9X
0.138	-0.146	CRYBG1
0.136	-0.145	PLAC8
0.133	-0.141	SMAD1
0.133	-0.138	MIAT
0.13	-0.135	PELI1
0.126	-0.134	KDM6A
0.114	-0.121	AKR1C3
0.105	-0.116	HAVCR2
0.105	-0.107	SENP5
0.099	-0.104	CPT1A
0.0876	-0.0875	RPL30
0.0865	-0.0923	PTPRCAP
0.0857	-0.0883	GABARAP
0.0842	-0.0885	ZZEF1
0.0835	-0.0861	GZMH
0.083	-0.0855	TP53INP2
0.082	-0.0856	C4orf48
0.0773	-0.083	ACTG1
0.0745	-0.075	PCM1
0.0708	-0.0771	ID2
0.07	-0.0737	RBM3
0.0666	-0.0674	ITGB7
0.0636	-0.0686	TMSB4X
0.0555	-0.0573	PRKX
0.0523	-0.0559	KLRB1
0.0503	-0.0523	ATP2A3
0.0478	-0.0527	KLRF1
0.044	-0.0418	JUN
0.0435	-0.0429	ANKRD36C
0.0288	-0.0328	SPON2
0.0243	-0.0241	CHST2
0.0211	-0.0191	TRGC1
0.0209	-0.0207	RPL37A
0.0196	-0.0182	MCOLN2
0.0176	-0.0176	IFNG
0.0171	-0.02	DIP2A
0.016	-0.0176	LCP1
0.0142	-0.0128	SRGN
0.0129	-0.0149	MALAT1
0.0075	-0.0079	XBP1
0.00516	-0.00325	HBA1
0.00429	-0.00336	RPS20
0.000297	-0.000393	RNF19A
-0.00159	-0.000694	CLIC3
-0.00605	0.0046	TENT2
-0.0121	0.0125	CCL4
-0.0158	0.0116	B2M
-0.016	0.0169	HBA2
-0.0213	0.0243	CD247
-0.024	0.0253	OST4
-0.0272	0.0267	IGFBP7
-0.0289	0.0359	RPLP1
-0.0353	0.0361	HBD
-0.0359	0.0359	CD7
-0.0374	0.0383	ANXA2
-0.0379	0.043	RACK1
-0.0384	0.0424	ABI3
-0.0398	0.0417	SLC9A3R1
-0.0456	0.048	KIR2DL1
-0.0481	0.0508	LRBA
-0.0486	0.0476	TRBC1
-0.0515	0.0521	ATG14
-0.0528	0.0572	MT-CO3
-0.0564	0.0598	IL2RB
-0.0591	0.0607	NUP98
-0.0595	0.0632	FOS
-0.0613	0.0657	CEBPD
-0.0622	0.0681	ATP8A1
-0.0657	0.0674	AGPS
-0.0688	0.0694	HOPX
-0.0708	0.0778	ZBTB10
-0.0711	0.0734	IGKV3-11
-0.0715	0.0753	ADRB2
-0.0746	0.0822	RPL4
-0.0806	0.0872	CTSW
-0.0829	0.0879	IER2
-0.0846	0.0897	JUNB
-0.0862	0.0938	RPS6
-0.0937	0.0973	CST7
-0.0974	0.103	PPIA
-0.1	0.104	SUMO2
-0.106	0.111	ATP5MG
-0.106	0.112	NCR3
-0.109	0.11	CCL3
-0.114	0.12	LINC00944
-0.115	0.118	TC2N
-0.117	0.121	EIF3G
-0.117	0.122	DUSP1
-0.122	0.129	CITED2
-0.126	0.132	BOK
-0.131	0.135	MT-CO1
-0.137	0.143	LCOR
-0.143	0.147	ZBTB40
-0.145	0.152	TXK
-0.146	0.152	PNRC1
-0.149	0.154	VAMP8
-0.153	0.159	MT-ND4
-0.156	0.164	SQSTM1
-0.157	0.165	PCBP1
-0.158	0.168	ABHD17A
-0.158	0.164	FAM107B
-0.163	0.17	RPL10A
-0.166	0.174	RAMP1
-0.167	0.18	HLA-DRB1
-0.17	0.177	RAP1B
-0.171	0.179	ZFP36L1
-0.175	0.181	NLRC3
-0.187	0.194	FCGR3A
-0.191	0.204	EEF1A1
-0.203	0.214	PRF1
-0.209	0.215	SELPLG
-0.209	0.215	CLIC1
-0.214	0.227	RPL13
-0.22	0.233	MT-ND1
-0.221	0.236	MT-ND3
-0.221	0.232	TMEM135
-0.223	0.234	HMGB1
-0.231	0.24	TYROBP
-0.233	0.242	STARD3NL
-0.235	0.245	CDKN2D
-0.244	0.254	AL390728.5
-0.251	0.264	CALM2
-0.252	0.262	JAK1
-0.254	0.268	H3F3B
-0.257	0.269	BTG1
-0.265	0.276	CYB5B
-0.267	0.283	MT-ND2
-0.273	0.286	CD99
-0.274	0.286	HIST1H1C
-0.281	0.294	AHNAK
-0.281	0.291	GZMB
-0.281	0.296	FXYD5
-0.285	0.299	LGALS9B
-0.291	0.305	PPBP
-0.293	0.309	TPT1
-0.294	0.306	TUBB1
-0.306	0.322	DHRS7
-0.311	0.327	CD69
-0.319	0.333	KLF2
-0.324	0.34	PYHIN1
-0.325	0.338	ARL4C
-0.327	0.342	TMEM35B
-0.331	0.349	HIST1H4C
-0.337	0.354	ARF6
-0.364	0.38	HRASLS2
-0.365	0.381	CD300A
-0.371	0.39	LINC00299
-0.372	0.387	RELL1
-0.374	0.391	KMT2E-AS1
-0.375	0.392	HLA-B
-0.377	0.394	PLEKHF1
-0.387	0.404	HIST2H2AA4
-0.396	0.413	TPST2
-0.408	0.429	HNRNPF
-0.421	0.443	TAGAP
-0.431	0.451	THEMIS2
-0.431	0.451	EMP3
-0.431	0.445	TRDV1
-0.435	0.457	SAT1
-0.438	0.458	GIMAP4
-0.442	0.461	MAPRE2
-0.446	0.463	S100A9
-0.448	0.471	EGR1
-0.464	0.485	PTPN12
-0.473	0.494	C1orf162
-0.483	0.506	SPOCK2
-0.496	0.519	GIMAP2
-0.506	0.531	UTY
-0.518	0.542	AC093010.2
-0.522	0.546	COL13A1
-0.536	0.559	GIMAP7
-0.537	0.56	SELL
-0.538	0.561	ZNF600
-0.547	0.572	GIMAP1
-0.56	0.581	GOLGA8B
-0.564	0.586	SH2D1B
-0.576	0.604	HSPA1A
-0.577	0.602	SLC2A3
-0.583	0.606	EFHD2
-0.599	0.626	SIGLEC7
-0.612	0.642	CD2
-0.623	0.651	LINC00861
-0.639	0.671	TTTY15
-0.651	0.679	WSB1
-0.661	0.691	POMC
-0.673	0.704	MT-ATP8
-0.675	0.711	IL12RB2
-0.694	0.727	KIR3DL1
-0.699	0.729	TRBV3-1
-0.701	0.733	TNFRSF18
-0.715	0.746	TRAV35
-0.718	0.751	LTB
-0.732	0.766	AC087623.3
-0.768	0.802	AK5
-0.772	0.806	CXCR2
-0.778	0.817	IL18RAP
-0.847	0.888	DDX3Y
-0.887	0.927	EIF1AY
-0.94	0.984	S100A8
-0.994	1.04	CXXC5
-1.04	1.09	ATP2B1-AS1
-1.35	1.42	RPS4Y1
