# Supplementary material for: Linking COVID-19 to Neurodegeneration: A Single-Cell Deep Learning Study of PBMCs in Multiple Sclerosis and Alzheimer’s Disease
Source: Research Square preprint supplement (doi:10.21203/rs.3.rs-7342199/v1), 2025-10-08
Supplement: Supplementary file 4 [file 5840aa00e48cb1a3cb0d5d63.xlsx]

## Sheet: Sheet1
Table 9. LncRNA List in cell type
lncRNA	Rank		avg_log2FC		Cell Line	Protein Target	Function
	nCoV	MS	nCoV	MS
XIST	2	7	9.65	12.98	B	HNRNPU	X-Inactivation &
	1	-	11.06	-	T		The difference in immune response between men and women due to the difference in TLR gene expression
	1	2	12.79	12.98	M
	1	29	11.28	11.2	NK
THUMPD3-AS1	41	-	0.76	-	B	CXCL17	Promote cell proliferation, migration & Inhibit Apoptosis
						BCAT1
AC020916.1	56	-	1.72	-	B	NF-Κb pathway	Positive regulating inflammation and immune response
	34	-	0.52	-	M
AC016831.7	57	-	0.82	-	B		positive regulator of type I interferon pathway
(LINC00513)						STAT1
	65	-	0.69	-	NK	STAT2
LINC01215	95	-	0.68		B	RUNX3	promoting proliferation.
							And immune response
GABPB1-AS1	-	19	-	0.24	B	GABPB1	suppression of the cellular antioxidant capacity and
	-	84	-	1.34	T
SLC16A1-AS1	-	33	-	1.68	B	SLC16A1/ MCT1	Promote cell viability, proliferation, cell migration and Inhibit apoptosis & ferroptosis
PSMA3-AS1	-	43	-	0.57	B	TLR10	Regulate B cell differentiation & Immune response
						EZH2
						LYL1
TSIX	110	44	8.51	7,72		HNRNPU	Bind to XIST & Help to X chromosome inactivation & Regulate Immune response
MALAT1	-	76	-	0.12	B	DC-SIGN	Regulate immune response
	-	14	-	0.74	T	IL10
FP671120.3	2	-	1.53	-	T	-	-
AC105052.3	4	-	4.71	-	T	-	-
AC021028.1	19	-	1.71	-	T	-	-
AC005480.1	-	31	-	9.87	T	-	-
POLR2J3.1	30	-	0.95	-	T	-	-
AL121983.2	79	-	2.85	-	T	-	-
EPHA1-AS1	21	-	0.87	-	T	EphA1 receptor	Promote apoptosis & involved in AD
THAP9-AS1	31	-	0.97	-	T	SOX4	Regulate Cell proliferation and migration
						VEGFA
						YAP
MIF-AS1	-	99	-	10.23	T	NDUFA4	Promote proliferation and inhibit apoptosis
AC012615.1	18	-	0.8	-	NK	KRAS	Promote proliferation and inhibit apoptosis
TRG-AS1	20	79	1.82	2.24	NK	SUZ12	Regulate Proliferation & Immune response
LINC00402	50	-	3.83	-	NK	ERK1, 2	Promote Immune response
ITGB2-AS1	57	-	1.22	-	NK	HMGA1	Promote cell survival, migration & invasion and inhibit apoptosis
AC113404.1	-	21	-	8.68	NK	SVC2	Promote cell proliferation
LINC00685	-	93	-	-2.53	NK	PPP2R3B	negative regulator of a gene with potential role in spermatogenesis
AC025171.3	97	-	1.83	-	M	-	-
LINC00877	-	38	-	-1.2	M	-	-
MIR181A1HG	32	-	0.86	-	M	SOX5	epigenetic regulator of early stages of mesenchymal lineage
						DLX
AC245128.3	64	-	1.65	-	M	NF-Κb	Positive regulating inflammation and immune response
AC005264.1	80	-	1.73	-	M	P53	Promote cell survival, migration & invasion and inhibit apoptosis
