# Supplementary material for: Linking COVID-19 to Neurodegeneration: A Single-Cell Deep Learning Study of PBMCs in Multiple Sclerosis and Alzheimer’s Disease
Source: Research Square preprint supplement (doi:10.21203/rs.3.rs-7342199/v1), 2025-10-08
Supplement: Supplementary file 5 [file 6faacfd2edb009c3f2e4aeb2.xlsx]

## Sheet: Sheet1
Table1, sorted_data_B_Covid
Class0	Class1	gene
3.99	-3.26	HLA-DRB5
2.13	-1.74	XIST
1.9	-1.56	TLE1
1.88	-1.54	AHI1
1.74	-1.42	SLC39A9
1.66	-1.36	STAG3
1.66	-1.35	JUP
1.61	-1.32	MRPL23
1.41	-1.16	DDX3X
1.41	-1.15	LYST
1.37	-1.11	AREG
1.36	-1.11	IFITM1
1.36	-1.11	PNN
1.35	-1.1	HLA-DQB1
1.32	-1.08	C16orf54
1.32	-1.08	FOSB
1.3	-1.06	SNX9
1.28	-1.05	KLF4
1.26	-1.03	DNAJA1
1.24	-1.01	FBXO21
1.23	-1	MAPK1IP1L
1.23	-1	KDM6B
1.22	-0.992	EHD4
1.2	-0.978	U2AF1L5
1.18	-0.971	RPS4X
1.17	-0.949	TNFAIP3
1.14	-0.932	BCL2L11
1.13	-0.923	NR1H2
1.1	-0.893	VPS37B
1.07	-0.874	RELB
1.07	-0.873	ZNF593
1.06	-0.87	FAM133B
1.06	-0.863	CBWD1
1.05	-0.851	ADAM28
1.04	-0.852	NFKB2
1.04	-0.852	PER1
1.03	-0.842	ARPC1B
1.03	-0.845	CARMIL1
1.01	-0.823	CEMIP2
1	-0.819	RSRP1
0.994	-0.812	THUMPD3-AS1
0.992	-0.81	CREM
0.987	-0.81	DPH3
0.971	-0.794	FAM118A
0.97	-0.794	SIK1B
0.969	-0.791	PTPN1
0.965	-0.787	RSRC2
0.937	-0.766	DNAAF2
0.935	-0.763	RELL1
0.933	-0.765	GOLT1B
0.925	-0.754	YWHAZ
0.919	-0.749	B9D2
0.904	-0.738	POLR2A
0.9	-0.735	TSPYL1
0.898	-0.731	RPS10
0.896	-0.734	AC020916.1
0.89	-0.724	AC016831.7
0.886	-0.723	RCE1
0.879	-0.72	WHRN
0.878	-0.716	DNAJC15
0.87	-0.708	HLA-DPB1
0.865	-0.707	MAN2A1
0.858	-0.7	TOE1
0.854	-0.695	ABCG1
0.852	-0.697	RHOH
0.84	-0.686	RRP12
0.834	-0.683	ARID5A
0.832	-0.676	PPP2CA
0.83	-0.681	LMNA
0.827	-0.675	MANBA
0.824	-0.672	ARGLU1
0.816	-0.668	CLK1
0.816	-0.668	PRRC2C
0.791	-0.647	PLK2
0.787	-0.642	EIF1B
0.786	-0.643	AKIRIN1
0.773	-0.632	HSPA9
0.766	-0.621	TUBB2A
0.765	-0.622	ZFAND2A
0.745	-0.608	TRAF4
0.745	-0.61	AFF3
0.743	-0.608	MAP3K8
0.74	-0.606	SESN1
0.738	-0.601	PLA2G4C
0.722	-0.591	BZW1
0.721	-0.591	IQGAP1
0.72	-0.589	MED21
0.719	-0.587	YJU2
0.701	-0.572	INSIG1
0.692	-0.567	UVRAG
0.685	-0.559	SKIL
0.683	-0.556	RFTN1
0.674	-0.552	SMCHD1
0.673	-0.549	ZNF318
0.665	-0.544	LINC01215
0.663	-0.539	NCL
0.652	-0.532	KANSL2
0.648	-0.529	RBKS
0.645	-0.527	DDX5
0.639	-0.524	NGRN
0.638	-0.522	GRASP
0.637	-0.522	KLF10
0.628	-0.514	EIF1
0.627	-0.51	P2RX1
0.616	-0.503	GPR146
0.615	-0.502	RASGEF1B
0.612	-0.499	STX5
0.609	-0.498	CWC25
0.596	-0.49	SLBP
0.596	-0.486	ATF7IP
0.592	-0.484	OXCT1
0.587	-0.481	ATXN7L3B
0.586	-0.478	MS4A1
0.576	-0.468	LRRC59
0.572	-0.465	CIRBP
0.571	-0.465	SNX10
0.567	-0.466	AC004687.1
0.565	-0.461	SIPA1L1
0.564	-0.464	TXNIP
0.563	-0.46	CENPC
0.549	-0.445	NOP58
0.547	-0.446	SRSF10
0.541	-0.443	SON
0.54	-0.439	SAMHD1
0.537	-0.438	NUP98
0.529	-0.434	LCN8
0.528	-0.433	DUSP12
0.527	-0.431	PRR7
0.525	-0.428	ANKRD44
0.518	-0.425	ARHGAP24
0.514	-0.419	SRSF5
0.511	-0.411	IDS
0.506	-0.412	RNF138
0.506	-0.416	SNU13
0.495	-0.402	DDX21
0.494	-0.401	KDM6A
0.488	-0.4	MT-ATP6
0.484	-0.397	JUND
0.475	-0.387	ARHGDIB
0.475	-0.389	HBM
0.473	-0.39	TCF25
0.472	-0.384	ALAS2
0.472	-0.385	GIMAP4
0.471	-0.385	EMP3
0.47	-0.381	KLF3
0.47	-0.382	NR4A3
0.469	-0.385	MTSS1
0.468	-0.382	PELI1
0.466	-0.381	CDC37
0.463	-0.379	ZNF331
0.453	-0.369	TIPARP
0.447	-0.365	BRD2
0.445	-0.363	PRPF38B
0.428	-0.35	RPS7
0.425	-0.348	PIK3IP1
0.422	-0.341	CCL4
0.404	-0.33	FXYD5
0.399	-0.325	ARL4A
0.396	-0.326	PRKX
0.395	-0.321	LINC00926
0.395	-0.322	LDLRAD4
0.395	-0.323	ARIH2
0.39	-0.317	NSF
0.387	-0.319	G3BP2
0.387	-0.318	HBD
0.381	-0.314	ELF1
0.371	-0.305	DNMBP
0.37	-0.303	PHF5A
0.368	-0.3	HUS1
0.367	-0.303	CD27
0.357	-0.287	EPC1
0.355	-0.288	ZC3H15
0.352	-0.287	ZC3H12A
0.352	-0.288	PLK3
0.352	-0.288	USP16
0.351	-0.288	BCLAF1
0.349	-0.286	BACH1
0.345	-0.285	LINC00649
0.343	-0.283	TUBB6
0.341	-0.279	ETV5
0.339	-0.278	ZFP36L2
0.336	-0.274	GABARAPL1
0.33	-0.27	EIF1AX
0.327	-0.267	MBNL1
0.327	-0.267	MRPL51
0.323	-0.264	GABPB1
0.318	-0.26	NR4A1
0.316	-0.258	MT-ND4L
0.309	-0.247	TLR10
0.306	-0.248	PTGER4
0.297	-0.243	NOL7
0.296	-0.241	NDUFB3
0.292	-0.238	RPS5
0.287	-0.233	TSPYL2
0.286	-0.236	IFI27
0.282	-0.229	RHOF
0.28	-0.225	SARAF
0.276	-0.225	RBM8A
0.273	-0.222	BUD31
0.273	-0.222	PARP1
0.272	-0.22	LAPTM5
0.272	-0.222	TOB1
0.27	-0.218	NFKBIA
0.27	-0.223	SP140
0.267	-0.219	COX6B1
0.265	-0.223	HBB
0.264	-0.218	LST1
0.264	-0.217	TMSB10
0.26	-0.214	SNHG12
0.26	-0.214	TWISTNB
0.257	-0.211	ZYX
0.256	-0.208	DAZAP2
0.255	-0.208	PPP1R18
0.254	-0.207	HBA1
0.252	-0.207	RHOA
0.252	-0.211	MRPL54
0.249	-0.201	CD81
0.246	-0.2	RPL22
0.245	-0.197	ELL2
0.244	-0.197	RBM39
0.242	-0.197	RPL13A
0.24	-0.198	UBC
0.24	-0.196	RPL23
0.24	-0.195	CPT1A
0.239	-0.195	CXorf40A
0.238	-0.195	TSC22D4
0.233	-0.191	HSP90AB1
0.233	-0.19	SRSF3
0.224	-0.184	NCF1
0.223	-0.183	MT-CO2
0.22	-0.182	ADGRE5
0.22	-0.181	CFAP20
0.216	-0.178	RPL23A
0.213	-0.176	RPL7
0.213	-0.171	HSPA5
0.211	-0.171	BCL7B
0.21	-0.171	LSP1
0.21	-0.171	UNC93B1
0.21	-0.172	SUSD3
0.203	-0.167	BTG3
0.2	-0.164	CAP1
0.199	-0.164	RPS2
0.195	-0.159	B2M
0.195	-0.164	TMEM243
0.191	-0.156	FTH1
0.188	-0.154	IGHV4-61
0.187	-0.154	TSC22D3
0.186	-0.15	FERMT3
0.185	-0.153	VASP
0.184	-0.151	RBM23
0.18	-0.146	FUS
0.176	-0.147	RCN2
0.175	-0.146	AAED1
0.172	-0.143	EEF1G
0.172	-0.14	GBP4
0.171	-0.141	EIF5
0.171	-0.139	TRAF3IP3
0.17	-0.144	SNHG15
0.167	-0.135	TUBA1A
0.162	-0.134	RPS25
0.161	-0.132	RPL17
0.158	-0.128	CYBA
0.157	-0.126	ZNF581
0.155	-0.126	CHMP4B
0.15	-0.123	KRT10
0.144	-0.12	ATP5F1A
0.144	-0.119	MT-ND5
0.143	-0.116	FAM53C
0.143	-0.119	IER2
0.139	-0.115	RIPOR2
0.138	-0.112	RNMT
0.134	-0.112	BTG1
0.133	-0.107	RPL15
0.131	-0.107	CMTM6
0.13	-0.105	RPS21
0.128	-0.101	GSTM1
0.126	-0.104	TWF2
0.124	-0.106	PRPF4B
0.124	-0.102	MT-CYB
0.123	-0.101	ZFX
0.121	-0.0985	DDIT4
0.121	-0.0986	MIF
0.12	-0.0963	UBA52
0.119	-0.0967	UBB
0.118	-0.0975	DBF4
0.115	-0.0939	RPL38
0.109	-0.0889	PPP1R15B
0.107	-0.0869	NOCT
0.105	-0.0841	PTPRCAP
0.104	-0.0828	IFRD1
0.103	-0.0876	RPL6
0.101	-0.0841	RACK1
0.0979	-0.0783	SPATA2
0.0956	-0.0792	ATP5F1E
0.0941	-0.0762	RPL13
0.0913	-0.0752	EZR
0.0879	-0.0709	ETF1
0.0877	-0.0726	AHSP
0.087	-0.0698	CORO1A
0.0853	-0.068	NKG7
0.0806	-0.065	APBB1IP
0.0799	-0.0653	ARPC2
0.0778	-0.0641	CD96
0.0747	-0.0603	SELENOK
0.0731	-0.0596	TXLNG
0.0692	-0.0561	CDKN1A
0.0657	-0.0575	HSBP1
0.0657	-0.0548	KLF6
0.0644	-0.0515	STK17B
0.0543	-0.0446	SAP18
0.0521	-0.0439	EEF2
0.0498	-0.044	LAMTOR2
0.0491	-0.0393	RPL26
0.049	-0.0387	ATP5ME
0.0463	-0.0371	KCNH8
0.0406	-0.0326	CCNL1
0.0384	-0.031	RPS11
0.0363	-0.0288	RAB11FIP1
0.0319	-0.0266	PPP4R3B
0.0304	-0.0226	BIN1
0.0272	-0.0204	ATP6V0E1
0.027	-0.0177	CHMP1B
0.0259	-0.0222	JUN
0.0256	-0.0231	SGK1
0.0235	-0.0201	RPS28
0.0205	-0.0144	RPL4
0.017	-0.0172	RPL3
0.0153	-0.0171	RPLP1
0.00424	-0.00328	TUBA1C
0.00396	-0.00407	PTPRC
0.00222	-0.00157	ALG13
0.00137	-0.000979	SGCE
0.000556	0.000303	CD69
-0.000272	-0.000826	MCL1
-0.00624	0.00611	RPS19
-0.00795	0.00527	NR4A2
-0.00876	0.00705	RPL39
-0.00914	0.00915	NFKBID
-0.0122	0.00975	STK24
-0.0145	0.0121	PPDPF
-0.0161	0.0125	RPS18
-0.0217	0.0182	HBA2
-0.0223	0.0199	CTSS
-0.0225	0.0193	ATP5MPL
-0.0244	0.0224	CTCF
-0.0276	0.0203	RPL34
-0.0282	0.0213	RPLP2
-0.0285	0.0237	GTF2B
-0.0287	0.0249	SELPLG
-0.0349	0.0308	AES
-0.0379	0.0324	CSK
-0.0419	0.0372	RNASE6
-0.0467	0.0423	ZFAND5
-0.0468	0.0403	H3F3A
-0.0476	0.0405	CXXC5
-0.0508	0.0397	IRS2
-0.0521	0.0425	IRF2BP2
-0.0568	0.0487	CTSZ
-0.0578	0.0503	RPL29
-0.0582	0.0461	RPL27A
-0.0602	0.0497	PLEKHF2
-0.0624	0.0505	PARK7
-0.0712	0.058	DDX24
-0.0788	0.0635	NRGN
-0.0804	0.0644	YPEL5
-0.0807	0.0633	EEF1A1
-0.0816	0.0682	GOLGB1
-0.0841	0.0684	ISCA1
-0.0889	0.0729	CD52
-0.0913	0.074	RPL27
-0.0935	0.0785	ANXA6
-0.0936	0.0779	CLEC2B
-0.0937	0.0763	CD48
-0.0951	0.0763	RPL28
-0.0985	0.0824	TMA7
-0.0986	0.079	ACTB
-0.103	0.0852	RPS16
-0.107	0.0871	CD79A
-0.108	0.0882	BACH2
-0.115	0.0948	RCC1
-0.118	0.0972	CCL5
-0.124	0.103	RPL18A
-0.128	0.106	PPP1R15A
-0.128	0.104	RPL35
-0.13	0.108	ATP6V0C
-0.131	0.107	AL118516.1
-0.134	0.108	TMSB4X
-0.138	0.111	CARD16
-0.14	0.114	SPI1
-0.144	0.116	RPL10A
-0.144	0.118	PPP1CA
-0.145	0.117	LIMD2
-0.145	0.118	EIF5A
-0.145	0.119	NPC2
-0.147	0.119	RPS24
-0.148	0.12	VPS35
-0.148	0.123	GADD45B
-0.151	0.124	GOLGA8B
-0.152	0.123	TUBB
-0.155	0.128	RPS27
-0.157	0.132	RECQL
-0.158	0.131	MSN
-0.159	0.128	THOC3
-0.163	0.132	BCAS2
-0.168	0.14	PTP4A2
-0.169	0.14	DSP
-0.172	0.142	IRF1
-0.172	0.143	CD79B
-0.174	0.141	PPBP
-0.181	0.148	AC245060.5
-0.182	0.148	RPL12
-0.186	0.153	SOCS1
-0.192	0.158	CALM1
-0.196	0.161	SEMA4B
-0.196	0.159	RPS9
-0.196	0.157	TPI1
-0.197	0.16	SET
-0.197	0.16	RPS17
-0.199	0.162	CFL1
-0.203	0.165	MT-CO3
-0.205	0.165	CA1
-0.206	0.165	RPS8
-0.207	0.17	PSMB9
-0.208	0.169	CALM2
-0.21	0.171	ABRACL
-0.211	0.174	RPL37
-0.224	0.181	BTG2
-0.225	0.183	RAC2
-0.235	0.193	GTF2H2
-0.239	0.196	ANKRD37
-0.24	0.193	IGLV2-11
-0.244	0.197	RPL37A
-0.252	0.208	SH3YL1
-0.26	0.21	CAPZB
-0.263	0.212	PRKCB
-0.265	0.219	RPS23
-0.273	0.227	PFN1
-0.273	0.221	ARL6IP5
-0.273	0.22	BRK1
-0.273	0.223	TPT1
-0.282	0.23	RPS14
-0.283	0.23	SMIM14
-0.284	0.232	MYADM
-0.289	0.237	IDI1
-0.291	0.239	ITM2C
-0.291	0.235	SRGN
-0.293	0.239	CD3E
-0.293	0.237	LSM10
-0.297	0.242	SRSF7
-0.314	0.26	MT-ND1
-0.316	0.257	TOMM7
-0.318	0.257	TENT5C
-0.319	0.263	IGHG3
-0.321	0.263	FGR
-0.322	0.266	FMNL1
-0.323	0.262	TUBB4B
-0.323	0.268	HMGCS1
-0.326	0.268	ENO1
-0.334	0.271	MT-ND3
-0.339	0.281	HLA-DRB1
-0.354	0.289	KIAA0040
-0.356	0.294	SEPHS2
-0.358	0.293	RALBP1
-0.359	0.294	CYCS
-0.36	0.288	RAB31
-0.366	0.299	ABHD17A
-0.371	0.303	TPM3
-0.376	0.309	IRF2
-0.378	0.306	RPS6
-0.381	0.312	LTB
-0.381	0.311	EIF3L
-0.383	0.313	ORMDL3
-0.386	0.315	MBD4
-0.397	0.322	DYNC1I2
-0.397	0.323	NDUFA8
-0.398	0.323	ATP5MD
-0.399	0.328	RGS2
-0.403	0.329	DUSP2
-0.403	0.328	EIF3E
-0.405	0.329	GIMAP7
-0.408	0.333	SIPA1
-0.422	0.345	CST3
-0.423	0.344	RPL31
-0.425	0.346	PTPN18
-0.43	0.35	RHOB
-0.432	0.352	LITAF
-0.438	0.359	COTL1
-0.439	0.356	ACTG1
-0.441	0.358	EMB
-0.443	0.362	RABAC1
-0.445	0.365	HNRNPDL
-0.445	0.361	QARS
-0.446	0.367	SMC6
-0.447	0.366	HNRNPF
-0.447	0.363	LNPEP
-0.449	0.366	HLA-C
-0.449	0.364	MT-ND4
-0.45	0.366	FCER1G
-0.451	0.368	EIF2AK3
-0.453	0.371	IL32
-0.454	0.369	CHL1
-0.454	0.372	ZFP36L1
-0.456	0.375	BLOC1S2
-0.461	0.377	ZFY
-0.462	0.379	ITM2B
-0.466	0.379	CD1C
-0.467	0.384	ERP29
-0.471	0.384	RPS29
-0.472	0.389	MZT2B
-0.475	0.39	HLA-DQA1
-0.476	0.388	CSRNP1
-0.478	0.391	ZBTB7A
-0.478	0.389	ZFP36
-0.486	0.397	ERAP2
-0.494	0.405	ZNF217
-0.496	0.408	DBP
-0.503	0.408	NDUFB1
-0.504	0.411	COX7C
-0.514	0.418	TRA2B
-0.517	0.425	OSER1
-0.52	0.425	GBP2
-0.528	0.429	CLIC1
-0.535	0.438	POLR2G
-0.537	0.438	MPEG1
-0.537	0.438	HERPUD1
-0.538	0.438	KLF2
-0.538	0.438	SUN2
-0.541	0.444	SH2B2
-0.541	0.44	ARPC5
-0.542	0.443	NDUFB5
-0.548	0.448	HNRNPD
-0.552	0.452	MT-CO1
-0.554	0.451	CNN2
-0.564	0.463	LINC01857
-0.574	0.472	RPS20
-0.6	0.489	SELL
-0.602	0.488	NXPH4
-0.621	0.505	HDDC2
-0.629	0.515	NAA38
-0.642	0.527	KDM5D
-0.645	0.525	PTRHD1
-0.65	0.527	DDIT3
-0.665	0.544	VCAN
-0.68	0.557	FCER2
-0.682	0.556	LSM2
-0.721	0.588	MAP7D1
-0.726	0.593	SBDS
-0.728	0.592	DAXX
-0.732	0.597	CSTB
-0.747	0.61	LINC00278
-0.75	0.613	RAB11A
-0.752	0.614	MYL12A
-0.755	0.616	TKT
-0.755	0.618	C16orf74
-0.76	0.617	TMEM156
-0.767	0.628	GNG5
-0.771	0.627	KLK1
-0.774	0.633	S1PR4
-0.783	0.641	USP9Y
-0.784	0.638	IFIT5
-0.79	0.645	C16orf87
-0.797	0.649	OST4
-0.812	0.662	SNRPD3
-0.823	0.674	BACE2
-0.829	0.679	CMTM7
-0.834	0.683	FYB1
-0.839	0.686	AIF1
-0.839	0.685	PKIG
-0.842	0.686	FCMR
-0.843	0.691	TNFSF12
-0.861	0.704	AC009041.2
-0.862	0.704	FCN1
-0.863	0.704	POMC
-0.88	0.721	ATP5MC3
-0.895	0.733	MT-ND2
-0.899	0.736	HLA-DPA1
-0.9	0.735	TUBB1
-0.907	0.74	NDUFA2
-0.913	0.746	XRCC5
-0.914	0.747	VAMP8
-0.932	0.759	KCNG1
-0.973	0.791	ZNF706
-0.976	0.796	ACTR3
-0.996	0.815	COBLL1
-1.02	0.829	S100A9
-1.02	0.837	A1BG
-1.04	0.845	TYROBP
-1.07	0.873	CD83
-1.1	0.896	MPLKIP
-1.1	0.902	CCT5
-1.12	0.91	ABI3
-1.12	0.918	CHI3L2
-1.13	0.924	ARF6
-1.14	0.932	PDLIM1
-1.15	0.94	GTF2H5
-1.16	0.943	SNHG7
-1.16	0.946	TCL1A
-1.25	1.02	LYSMD2
-1.29	1.06	CAVIN2
-1.32	1.08	TIFA
-1.35	1.1	PCBP1
-1.36	1.11	STMN1
-1.36	1.11	SLC2A3
-1.46	1.19	MT-ATP8
-1.64	1.34	DDX3Y
-1.69	1.39	SLC25A25
-1.9	1.55	TTTY15
-2.08	1.7	S100A8
-2.23	1.82	LYZ
-2.39	1.95	UTY
-2.98	2.44	EIF1AY
-3.31	2.7	RPS4Y1
