# Supplementary material for: Linking COVID-19 to Neurodegeneration: A Single-Cell Deep Learning Study of PBMCs in Multiple Sclerosis and Alzheimer’s Disease
Source: Research Square preprint supplement (doi:10.21203/rs.3.rs-7342199/v1), 2025-10-08
Supplement: Supplementary file 6 [file 793782dfc5de19017714cc02.xlsx]

## Sheet: Sheet1
Table4. sorted_data_T_cell_Covid
Class0	Class1	gene
13.7	-12.2	XIST
7.52	-6.7	FP671120.3
7.46	-6.63	SCGB3A1
7.03	-6.27	AC105052.3
7	-6.23	MYL6B
6.23	-5.55	IGKV2-30
6.15	-5.48	ABCG1
5.93	-5.28	IFI44L
5.9	-5.26	C20orf204
5.42	-4.83	HLA-DRB5
5.42	-4.82	IGLV8-61
5.41	-4.81	POLR2J3
5.41	-4.82	CCL4L2
5.33	-4.75	IGHV3-30
5.33	-4.74	MRPL23
5.26	-4.68	IGHV3-7
5.17	-4.6	NDUFA11
5.09	-4.54	TUBA1C
5.06	-4.5	AC021028.1
5.04	-4.49	TSR1
5	-4.45	EPHA1-AS1
4.97	-4.42	ZNF473
4.96	-4.43	AJM1
4.88	-4.34	PLOD1
4.88	-4.35	TCAF2
4.83	-4.3	TP53I11
4.78	-4.26	PNPLA6
4.75	-4.22	CBWD1
4.73	-4.21	COG3
4.72	-4.21	POLR2J3.1
4.7	-4.18	THAP9-AS1
4.7	-4.18	MAN2C1
4.69	-4.17	SPATA6L
4.68	-4.16	FAM118A
4.67	-4.16	NARFL
4.64	-4.13	LAIR2
4.61	-4.1	KLHL11
4.55	-4.04	ATP2A3
4.54	-4.04	SUGP2
4.53	-4.04	CD83
4.51	-4.02	RCC1
4.5	-4.02	OXCT1
4.48	-3.98	TNFSF8
4.46	-3.96	TGOLN2
4.44	-3.95	GPBP1
4.4	-3.91	NFKBIA
4.39	-3.91	BICDL1
4.38	-3.9	MYOM2
4.37	-3.88	PASK
4.36	-3.87	CIB1
4.36	-3.88	SLC35F5
4.35	-3.87	SMAD1
4.33	-3.85	PLAA
4.33	-3.86	PLCG2
4.32	-3.85	FAAH2
4.31	-3.84	GOLGA8A
4.3	-3.83	SPRTN
4.3	-3.84	GET4
4.29	-3.81	SEC61A1
4.28	-3.81	NBPF9
4.25	-3.77	FTO
4.24	-3.78	PWP2
4.24	-3.77	BOLA2-SMG1P6
4.23	-3.77	CFAP20
4.22	-3.75	SERPINB9
4.19	-3.72	DDT
4.18	-3.73	DDIT4
4.16	-3.7	IGKV3-11
4.16	-3.7	MTAP
4.12	-3.67	ATG13
4.1	-3.65	SULT1A1
4.1	-3.65	PLD3
4.05	-3.61	GSTM2
4.05	-3.6	CENPT
4.04	-3.59	WASHC1
4.04	-3.6	EOGT
4.04	-3.6	NEXMIF
4.02	-3.58	TCIRG1
4.01	-3.57	AL121983.2
4.01	-3.58	ZBED5
4.01	-3.57	SIDT1
4	-3.56	IGKC
3.99	-3.55	HERC5
3.99	-3.55	NPIPB5
3.97	-3.53	AP1G1
3.96	-3.52	SYTL3
3.93	-3.5	RPL36A
3.9	-3.47	LLPH
3.89	-3.46	DDOST
3.89	-3.46	ACADVL
3.88	-3.45	GSTM1
3.87	-3.45	LPCAT1
3.86	-3.44	SLC9A1
3.81	-3.39	BLOC1S1
3.8	-3.39	C11orf21
3.8	-3.38	ABHD5
3.79	-3.38	SUPT6H
3.79	-3.38	AMMECR1L
3.78	-3.37	POLR3E
3.78	-3.36	NSF
3.74	-3.33	GGA3
3.74	-3.33	EPSTI1
3.74	-3.33	TCEAL2
3.73	-3.32	TYK2
3.72	-3.31	FLOT1
3.71	-3.3	MPPE1
3.7	-3.29	BTAF1
3.68	-3.28	CD84
3.68	-3.28	DOCK8
3.67	-3.26	KHDC4
3.65	-3.25	LINC00957
3.63	-3.24	TSIX
3.62	-3.22	CIAO1
3.58	-3.19	CDK16
3.58	-3.19	NUP98
3.57	-3.18	KANSL2
3.54	-3.15	SFI1
3.53	-3.14	VPS13D
3.52	-3.13	MED19
3.52	-3.14	JCHAIN
3.51	-3.12	CTC1
3.51	-3.12	LINC00623
3.48	-3.1	CD4
3.46	-3.07	RCBTB2
3.45	-3.07	PATL2
3.44	-3.06	ABCA1
3.43	-3.05	METRNL
3.41	-3.03	IL21R
3.4	-3.03	HSBP1L1
3.4	-3.02	CCNL2
3.38	-3.02	AC116407.2
3.37	-3	STK35
3.37	-3	EXOSC10
3.36	-2.99	SLC12A7
3.34	-2.98	SLC25A16
3.33	-2.96	SREBF1
3.33	-2.96	PAFAH1B1
3.32	-2.96	ZNF483
3.29	-2.93	CCL3
3.29	-2.93	PTAR1
3.28	-2.92	SOCS3
3.27	-2.92	IREB2
3.27	-2.91	RHOC
3.27	-2.92	STAT6
3.25	-2.9	XCL2
3.23	-2.88	TMEM67
3.23	-2.88	IRF4
3.22	-2.87	GPR141
3.21	-2.85	RPS10
3.2	-2.85	MTCH1
3.2	-2.85	MTOR
3.2	-2.85	AC233976.1
3.19	-2.85	PPP1R2C
3.19	-2.83	IFI27
3.17	-2.83	PPP4R3B
3.15	-2.81	ZNF394
3.14	-2.79	SNX19
3.14	-2.79	ITGB2-AS1
3.14	-2.8	ZNF250
3.13	-2.79	RELB
3.12	-2.78	MRPL32
3.12	-2.78	AC005037.1
3.11	-2.77	IGLV1-40
3.11	-2.76	ADGRE5
3.09	-2.75	ICAM1
3.09	-2.75	PKN2
3.08	-2.74	LAMP3
3.08	-2.74	DDX3X
3.06	-2.72	CHD3
3.06	-2.73	AAR2
3.04	-2.69	ANKRD36
3.04	-2.7	RUBCN
3.03	-2.7	ATP8A1
3.02	-2.69	NDUFAF6
3.01	-2.68	SNHG15
3.01	-2.68	UHMK1
3.01	-2.69	ILF3
2.99	-2.66	RPS4X
2.99	-2.67	EFTUD2
2.98	-2.65	PIM1
2.97	-2.65	ARL4D
2.96	-2.63	PRKX
2.96	-2.63	WDR45B
2.96	-2.63	GTSCR1
2.95	-2.62	MIR29B2CHG
2.95	-2.62	PREPL
2.94	-2.62	TTC16
2.94	-2.62	NCBP2-AS2
2.93	-2.61	TBCD
2.92	-2.6	UNKL
2.92	-2.6	CHFR
2.91	-2.59	GADD45A
2.9	-2.59	B4GALT4
2.9	-2.57	MSL3
2.89	-2.57	IFNGR2
2.89	-2.57	IFIT2
2.89	-2.58	AC020659.1
2.88	-2.56	B4GALT1
2.88	-2.56	FBXO32
2.88	-2.56	MCM3
2.87	-2.56	MADD
2.87	-2.56	DNTTIP2
2.86	-2.54	TRAK2
2.86	-2.55	SUPV3L1
2.85	-2.54	SLC4A7
2.84	-2.53	CROCC
2.84	-2.52	SCAP
2.84	-2.53	LRBA
2.83	-2.52	SORL1
2.82	-2.51	CFAP43
2.82	-2.51	OASL
2.81	-2.51	MTO1
2.8	-2.49	TAF4B
2.8	-2.49	AC020916.1
2.79	-2.47	ACBD6
2.79	-2.49	ILF2
2.79	-2.49	AUP1
2.78	-2.48	CPNE1
2.77	-2.47	TMEM258
2.77	-2.48	TNFRSF4
2.77	-2.46	RBM17
2.77	-2.47	TENT5C
2.75	-2.45	SUPT5H
2.75	-2.45	AHI1
2.75	-2.44	FOSB
2.74	-2.44	POLR1C
2.73	-2.43	EIF4B
2.73	-2.42	TAPBP
2.72	-2.43	DNAJA1
2.72	-2.43	SYNGR1
2.71	-2.42	TSPAN14
2.71	-2.41	ZNF622
2.71	-2.41	WASF1
2.71	-2.41	COX19
2.7	-2.4	IKBKB
2.69	-2.38	LGALS8
2.68	-2.38	C14orf132
2.68	-2.39	TENT5A
2.68	-2.38	CMTR1
2.68	-2.39	TMEM175
2.67	-2.37	DCTN4
2.67	-2.37	SND1
2.67	-2.39	BACH2
2.66	-2.37	KDM6A
2.66	-2.37	RABL2B
2.66	-2.37	VPS13B
2.65	-2.35	RSRP1
2.65	-2.36	SEL1L
2.65	-2.35	RBM14
2.65	-2.36	CCR6
2.64	-2.36	ESYT1
2.64	-2.35	UBB
2.63	-2.34	REX1BD
2.63	-2.33	RAP1GAP2
2.62	-2.33	C19orf66
2.61	-2.33	DTHD1
2.61	-2.32	KMT2D
2.6	-2.32	GLUL
2.6	-2.32	LENG8
2.6	-2.32	FBXW11
2.59	-2.29	TMED4
2.59	-2.31	SLC30A5
2.59	-2.31	ZNF410
2.58	-2.3	IGFBP3
2.57	-2.29	EDRF1
2.56	-2.28	ZAP70
2.55	-2.27	SRGAP2
2.54	-2.25	TSPYL4
2.53	-2.26	RNF44
2.53	-2.25	NAGPA
2.52	-2.25	CUL2
2.51	-2.24	CNBD2
2.51	-2.23	TFIP11
2.51	-2.24	CCNT2
2.5	-2.23	THUMPD2
2.49	-2.22	GYPC
2.48	-2.2	IL6ST
2.48	-2.2	N4BP2
2.46	-2.19	C11orf68
2.45	-2.18	PPARD
2.44	-2.17	LINC01089
2.43	-2.16	TXK
2.43	-2.16	SELENOK
2.43	-2.17	NOM1
2.43	-2.17	UGCG
2.43	-2.16	LINC01588
2.42	-2.15	NFIL3
2.42	-2.16	DNAJC2
2.41	-2.13	RELL1
2.41	-2.14	ACSL3
2.41	-2.15	PER1
2.41	-2.14	NEU1
2.4	-2.13	ARID5B
2.4	-2.13	S100B
2.39	-2.13	NRIP1
2.39	-2.13	ADAMTSL5
2.39	-2.13	TLNRD1
2.38	-2.12	LINC01465
2.38	-2.13	OSER1
2.38	-2.11	ARHGAP12
2.37	-2.11	IFT57
2.37	-2.11	PTGER2
2.37	-2.1	C18orf25
2.37	-2.11	VAMP2
2.36	-2.1	SETD4
2.36	-2.11	DMTF1
2.35	-2.1	AZIN1
2.34	-2.07	MIAT
2.32	-2.07	GP9
2.32	-2.07	TIMM17A
2.32	-2.06	UHRF1BP1L
2.31	-2.05	CDK12
2.31	-2.06	AREG
2.3	-2.04	DNAJC27
2.3	-2.05	CSRNP1
2.3	-2.04	ABCA7
2.29	-2.03	UHRF2
2.29	-2.04	NAF1
2.29	-2.03	RHEBL1
2.28	-2.03	SMPD4
2.27	-2.01	YWHAE
2.27	-2.02	IFIT3
2.27	-2.02	MATR3.1
2.27	-2.02	PTGDR
2.26	-2.01	SLC9A8
2.26	-2.01	NCOA7
2.24	-1.99	FAM53C
2.23	-1.99	C6orf48
2.23	-1.98	IFITM2
2.23	-1.98	MRPL54
2.23	-1.98	SLA
2.23	-1.98	MICAL1
2.23	-1.98	ZBTB21
2.23	-1.99	AC013264.1
2.22	-1.97	TRIB2
2.22	-1.97	JAZF1
2.22	-1.97	TXNIP
2.21	-1.97	PLEK
2.21	-1.96	ECHDC2
2.21	-1.97	ACER3
2.2	-1.95	ZNF331
2.2	-1.96	CDK5RAP3
2.2	-1.96	FBXO44
2.2	-1.96	STRIP1
2.2	-1.96	TIPARP
2.18	-1.93	PAG1
2.18	-1.93	THOC1
2.17	-1.93	POFUT1
2.17	-1.93	ITGA6
2.16	-1.93	VPS53
2.16	-1.93	SENP5
2.16	-1.91	SLC44A2
2.15	-1.92	SMARCA5
2.14	-1.92	TMF1
2.14	-1.91	FASN
2.14	-1.91	RBM7
2.14	-1.91	PLXDC1
2.14	-1.9	PRPF3
2.14	-1.9	TRBV13
2.14	-1.92	COMTD1
2.13	-1.89	MGAT2
2.13	-1.9	AC136475.1
2.12	-1.9	ORAI2
2.12	-1.89	PPIF
2.11	-1.87	MRPL14
2.11	-1.88	B9D2
2.11	-1.88	FBXO21
2.1	-1.87	STX16
2.1	-1.87	LONP2
2.1	-1.87	MYL9
2.09	-1.87	SNHG12
2.09	-1.87	C16orf54
2.09	-1.86	HHLA3
2.09	-1.86	TXLNG
2.08	-1.86	LYSMD2
2.08	-1.86	TRAC
2.08	-1.86	FLNA
2.08	-1.85	TTC38
2.08	-1.84	RHBDD2
2.07	-1.84	FBL
2.07	-1.84	TMEM41A
2.07	-1.84	OGT
2.07	-1.85	GSTO1
2.06	-1.84	RNASEH1
2.06	-1.84	CDK10
2.05	-1.83	TMEM45B
2.05	-1.83	ZXDB
2.05	-1.82	MDM4
2.04	-1.82	MYC
2.04	-1.82	DPP9
2.03	-1.8	LMBR1L
2.02	-1.8	GZMA
2.02	-1.8	NFKBIZ
2.02	-1.8	ING3
2.01	-1.79	NUP153
2	-1.78	APP
2	-1.78	CRTAM
2	-1.79	SMCHD1
1.98	-1.76	RREB1
1.98	-1.76	MLF1
1.98	-1.76	RPS6KL1
1.96	-1.74	FBLN5
1.96	-1.75	PGS1
1.96	-1.74	HSPA9
1.96	-1.75	TTC14
1.96	-1.74	AC004865.2
1.96	-1.74	KRT73
1.96	-1.75	COLQ
1.95	-1.73	ADCY7
1.95	-1.73	DMAP1
1.94	-1.73	PSMA3-AS1
1.93	-1.71	JMJD6
1.93	-1.73	FASTKD2
1.93	-1.73	MX1
1.93	-1.71	EPHB6
1.92	-1.71	SHLD1
1.92	-1.71	EIF4EBP2
1.91	-1.71	ZRANB2
1.91	-1.7	BRD2
1.91	-1.69	RNF125
1.91	-1.7	PCSK1N
1.9	-1.7	SESN3
1.9	-1.7	RNF6
1.9	-1.68	EIF4G2
1.9	-1.69	VHL
1.9	-1.69	HNRNPM
1.9	-1.68	HIGD2A
1.89	-1.68	FN3KRP
1.89	-1.68	GREM2
1.88	-1.68	EPC1
1.88	-1.67	ATG16L2
1.88	-1.67	ACSS2
1.87	-1.65	GLG1
1.87	-1.66	POMZP3
1.86	-1.66	MSC
1.86	-1.66	CREM
1.86	-1.66	DCTN1
1.86	-1.65	KRT10
1.86	-1.65	SOCS1
1.86	-1.66	ELMO1
1.86	-1.66	RLF
1.85	-1.65	AQR
1.85	-1.65	KAT7
1.84	-1.64	TNFAIP3
1.84	-1.64	YLPM1
1.83	-1.64	S1PR5
1.83	-1.64	AC124016.1
1.83	-1.63	AL109955.1
1.82	-1.62	ETF1
1.82	-1.61	COPS8
1.81	-1.61	PTTG1
1.79	-1.6	SPATA13
1.79	-1.59	C14orf119
1.79	-1.58	SMAD7
1.78	-1.58	KLHL18
1.78	-1.59	MTSS1
1.78	-1.58	TUFM
1.78	-1.59	DLST
1.77	-1.58	GTF2IRD2
1.77	-1.58	ADAM17
1.77	-1.58	GTF3C5
1.77	-1.57	GRPEL1
1.76	-1.57	TSPYL2
1.75	-1.55	ETV3
1.74	-1.55	GAK
1.74	-1.55	ARFGAP2
1.74	-1.55	SRGN
1.74	-1.55	PIK3IP1
1.73	-1.54	MBD4
1.73	-1.54	CYFIP2
1.73	-1.54	RND1
1.73	-1.54	KDM6B
1.73	-1.55	MAN2A1
1.73	-1.53	RORC
1.72	-1.52	POLR2A
1.72	-1.53	PDK1
1.72	-1.54	IPO7
1.72	-1.55	IL4I1
1.71	-1.52	ZFAND2A
1.71	-1.51	IL2RG
1.71	-1.52	EIF1
1.7	-1.52	NR4A3
1.7	-1.52	TCF25
1.7	-1.51	GABARAPL1
1.7	-1.51	VSIR
1.69	-1.51	ANKRD36B
1.69	-1.51	ASCC3
1.68	-1.49	LCOR
1.68	-1.5	MAML2
1.68	-1.5	ITPRIP
1.67	-1.49	DIABLO.1
1.67	-1.49	FAM53B
1.66	-1.47	TP53BP2
1.66	-1.48	RBM33
1.66	-1.48	TAF2
1.65	-1.47	C12orf76
1.65	-1.48	EIF2S3
1.64	-1.46	LILRB1
1.64	-1.47	LATS1
1.64	-1.45	ANKRD13C
1.63	-1.45	ZNF431
1.63	-1.44	ANKRD44
1.63	-1.46	ADAM12
1.63	-1.45	PRRC2A
1.63	-1.45	ATP6V1F
1.63	-1.45	ARL17B
1.63	-1.44	ZNF805
1.63	-1.46	LUC7L3
1.63	-1.45	CRYBG1
1.62	-1.44	FADS2
1.62	-1.44	PELI1
1.62	-1.44	NGDN
1.61	-1.43	SIVA1
1.61	-1.43	AC110769.2
1.6	-1.42	MT-ATP6
1.6	-1.42	DHX35
1.6	-1.42	NLRP1
1.59	-1.4	ATP1A1
1.58	-1.41	ATXN1L
1.58	-1.4	BPGM
1.58	-1.41	MINK1
1.58	-1.41	CHI3L2
1.58	-1.41	SAFB2
1.58	-1.41	GPRIN3
1.57	-1.39	USP9X
1.57	-1.4	SLC25A37
1.56	-1.39	ZNF682
1.56	-1.38	JAK3
1.56	-1.39	ZFC3H1
1.56	-1.4	TGFBR3
1.55	-1.38	UBE2F
1.54	-1.37	SEPSECS
1.54	-1.37	RIPK2
1.54	-1.37	PARP6
1.54	-1.37	SNRNP200
1.54	-1.37	API5
1.54	-1.38	PHF1
1.54	-1.37	KIF16B
1.53	-1.36	DYNLRB1
1.53	-1.37	KPNA2
1.52	-1.34	ZNF749
1.51	-1.35	CLK4
1.51	-1.34	MIF
1.51	-1.35	CASC3
1.51	-1.34	MPIG6B
1.51	-1.35	U2AF1L4
1.5	-1.34	PRKCQ
1.5	-1.34	C1orf52
1.5	-1.34	RNF213
1.5	-1.34	TMEM123
1.5	-1.34	SGSH
1.5	-1.34	IGKV3-20
1.49	-1.33	SNRPA1
1.49	-1.32	SLC46A3
1.49	-1.32	BRAP
1.48	-1.32	SEC24C
1.48	-1.32	NPEPPS
1.48	-1.31	MED9
1.46	-1.3	RPL41
1.46	-1.31	AL136038.3
1.46	-1.3	PTS
1.45	-1.29	ZNF326
1.45	-1.28	NBPF14
1.44	-1.28	NINJ1
1.44	-1.28	RRP12
1.44	-1.27	LUC7L
1.43	-1.27	AL669831.5
1.43	-1.28	DDX31
1.43	-1.27	SIK1B
1.43	-1.27	IPO9
1.42	-1.26	TMEM273
1.42	-1.26	TUBA4A
1.41	-1.26	ZFAS1
1.41	-1.25	PCMT1
1.41	-1.26	RAE1
1.41	-1.25	ERCC3
1.41	-1.26	FBXO7
1.4	-1.25	FBXO3
1.4	-1.26	SYNE1
1.4	-1.25	LAMP1
1.39	-1.24	SCAMP5
1.39	-1.24	AL645728.1
1.39	-1.24	TMCO1
1.39	-1.23	UBE2J1
1.39	-1.24	NME4
1.39	-1.24	NPIPB4
1.38	-1.23	ELF2
1.37	-1.23	SNX9
1.37	-1.21	ZC3HAV1
1.37	-1.21	TSKS
1.37	-1.21	CYTH1
1.37	-1.21	KLF7
1.36	-1.2	UBR4
1.36	-1.21	PFKFB3
1.36	-1.21	PLSCR1
1.36	-1.21	USP15
1.35	-1.21	GZMK
1.35	-1.2	HAUS3
1.35	-1.2	RPL7
1.35	-1.19	EIF1AD
1.35	-1.2	AC107959.4
1.35	-1.21	ALAS2
1.35	-1.2	PXN
1.34	-1.2	CKAP2
1.34	-1.19	ME1
1.34	-1.2	ITGAL
1.34	-1.19	NFKBIB
1.34	-1.19	BZW1
1.34	-1.2	BCCIP
1.33	-1.18	PTGER4
1.32	-1.18	RNASET2
1.32	-1.18	MSL2
1.32	-1.17	MT-ND4L
1.32	-1.17	AL390728.5
1.32	-1.17	IFITM1
1.31	-1.17	ZRSR2
1.31	-1.16	PNO1
1.31	-1.16	KANK1
1.31	-1.17	AQP3
1.3	-1.16	GADD45B
1.3	-1.16	POLR2C
1.29	-1.15	PRPF39
1.29	-1.14	RALGAPB
1.29	-1.15	FCRL6
1.29	-1.14	ORAOV1
1.29	-1.14	ITPR1
1.29	-1.14	KTI12
1.29	-1.15	ARHGEF1
1.29	-1.14	UBC
1.28	-1.15	UPP1
1.27	-1.13	TUBB4B
1.27	-1.14	FUS
1.27	-1.13	TRG-AS1
1.27	-1.13	SRSF10
1.26	-1.12	PSAP
1.26	-1.11	EAF1
1.25	-1.12	ZFAND5
1.25	-1.11	MYLIP
1.25	-1.11	NSG1
1.25	-1.11	ENO2
1.24	-1.11	AL163973.2
1.24	-1.1	CLK1
1.24	-1.12	EIF3D
1.23	-1.09	TRAPPC1
1.23	-1.1	VPS37B
1.23	-1.09	TCP11L2
1.22	-1.08	YWHAH
1.22	-1.08	UBE2M
1.22	-1.1	SOD2
1.22	-1.07	DIP2B
1.22	-1.09	C1orf21
1.22	-1.09	XBP1
1.21	-1.09	HBA1
1.21	-1.08	CA5B
1.21	-1.08	CUL5
1.2	-1.07	HMOX2
1.2	-1.07	EIF1B
1.2	-1.06	PRDM1
1.2	-1.07	VPS13C
1.19	-1.05	ZFYVE26
1.19	-1.06	DYNLL1
1.19	-1.06	TSC22D3
1.18	-1.05	PTCD3
1.16	-1.03	AL022323.4
1.16	-1.04	NSA2
1.16	-1.04	PTP4A1
1.14	-1.01	MFSD2A
1.14	-1.01	NRAS
1.14	-1.02	ULK3
1.14	-1.02	LTK
1.14	-1.02	TMEM223
1.13	-1.01	TMEM70
1.13	-1.01	ANKRD55
1.13	-1.01	TRA2B
1.12	-0.998	TRIM73
1.12	-0.992	LSM10
1.11	-0.993	RBM34
1.1	-0.98	SBNO1
1.1	-0.974	NSMCE1
1.1	-0.974	TMEM63A
1.09	-0.974	FGR
1.09	-0.969	MFSD11
1.08	-0.956	ANKRD52
1.08	-0.969	LGR6
1.08	-0.969	TRPM7
1.07	-0.96	DUSP4
1.07	-0.953	RFX3
1.07	-0.982	HBB
1.06	-0.938	AGO3
1.06	-0.939	PMAIP1
1.06	-0.937	IKZF5
1.06	-0.945	SF1
1.06	-0.942	IQSEC1
1.06	-0.946	KDM5C
1.05	-0.932	TMEM14C
1.05	-0.932	NUCB2
1.05	-0.928	CIRBP
1.05	-0.936	ARPC1B
1.05	-0.929	TRMT2B
1.05	-0.931	CYB561
1.04	-0.922	RAC1
1.04	-0.917	BANF1
1.04	-0.932	RNF149
1.03	-0.917	ANGEL2
1.03	-0.922	DDX24
1.03	-0.918	TUBGCP6
1.02	-0.911	ANKMY1
1.02	-0.908	SRSF7
1.02	-0.916	DYNLT1
1.02	-0.907	JAML
1.02	-0.909	YWHAB
1.02	-0.903	UBL5
1.02	-0.915	RBM48
1.01	-0.897	TYW1
1.01	-0.912	DIS3
1.01	-0.89	MCM3AP
1.01	-0.903	URI1
1.01	-0.897	CBLB
1	-0.894	ELL2
0.999	-0.895	MRPL44
0.997	-0.898	VTI1A
0.996	-0.883	SUPT7L
0.995	-0.883	ECD
0.993	-0.895	CA1
0.989	-0.879	PNPLA8
0.989	-0.878	YES1
0.988	-0.888	FAM153C
0.984	-0.872	ENTPD4
0.979	-0.868	RPL36
0.976	-0.87	RPL17
0.974	-0.858	KLF9
0.973	-0.86	ARID2
0.972	-0.87	ZNF484
0.97	-0.86	LMO4
0.969	-0.872	CDC42SE1
0.967	-0.864	STX11
0.967	-0.86	CD52
0.965	-0.864	MBNL1
0.959	-0.855	SERPINB6
0.959	-0.855	CD6
0.954	-0.849	PIM3
0.953	-0.847	TRIM28
0.946	-0.841	ARGLU1
0.942	-0.832	BCL10
0.938	-0.832	ARHGAP4
0.936	-0.839	OXLD1
0.933	-0.824	DCAF16
0.931	-0.837	ARIH2
0.926	-0.822	HSP90B1
0.924	-0.822	NDEL1
0.922	-0.824	C22orf39
0.921	-0.82	NDUFB10
0.921	-0.821	PDCD10
0.916	-0.81	TIGD1
0.913	-0.808	STRADB
0.912	-0.817	EIF1AX
0.91	-0.807	INPP4B
0.908	-0.801	ALG13
0.903	-0.809	DIP2A
0.903	-0.807	NUDT15
0.902	-0.798	TP53I13
0.897	-0.8	TRBV28
0.895	-0.799	UBL7
0.892	-0.788	NPC2
0.892	-0.794	CREBZF
0.889	-0.787	TMEM131L
0.888	-0.79	CEMIP2
0.887	-0.791	VAMP1
0.887	-0.787	PI16
0.884	-0.788	GTF2B
0.881	-0.776	PPP1CA
0.878	-0.777	TP53BP1
0.878	-0.777	PTPN1
0.877	-0.79	CNIH4
0.876	-0.782	GNLY
0.875	-0.779	SSR4
0.869	-0.774	EEF1G
0.866	-0.77	GOLT1B
0.857	-0.766	CRY1
0.853	-0.761	ATP5MF
0.85	-0.754	S100A6
0.848	-0.766	HBD
0.846	-0.757	NOP58
0.84	-0.746	AC012615.1
0.839	-0.742	ZNF589
0.839	-0.751	PAQR8
0.838	-0.733	TRBV6-4
0.837	-0.742	CYCS
0.833	-0.752	NARF
0.831	-0.741	HERPUD1
0.83	-0.74	PNN
0.828	-0.742	EIF3H
0.827	-0.735	PSMD4
0.813	-0.724	MAPK8IP3
0.811	-0.718	HEXA
0.809	-0.722	IFITM3
0.809	-0.72	RRN3
0.797	-0.71	PI4KB
0.794	-0.712	ODC1
0.793	-0.704	MT-CO2
0.79	-0.7	DDX1
0.789	-0.706	GTF2H2
0.786	-0.702	CCDC173
0.785	-0.697	S100A11
0.781	-0.69	CEBPB
0.78	-0.693	CRY2
0.776	-0.69	VPS51
0.776	-0.686	RERE
0.775	-0.701	ATXN2L
0.771	-0.681	ZC3H15
0.77	-0.685	CSDE1
0.77	-0.693	COX4I1
0.769	-0.696	TACC1
0.765	-0.676	WDR47
0.762	-0.681	CACUL1
0.76	-0.682	SUB1
0.758	-0.684	ZFYVE27
0.756	-0.673	SLC25A6
0.756	-0.666	HMGB2
0.754	-0.68	RASA3
0.751	-0.682	SSH2
0.751	-0.664	SYAP1
0.743	-0.656	HNRNPA2B1
0.742	-0.656	LMBR1
0.741	-0.648	NDUFS6
0.741	-0.663	TNKS
0.737	-0.659	STAT3
0.732	-0.658	SIT1
0.731	-0.652	BATF
0.728	-0.645	C4orf3
0.728	-0.652	TCERG1
0.725	-0.636	CSNK1D
0.723	-0.645	OAZ1
0.719	-0.637	LINC01871
0.719	-0.635	ARAP2
0.718	-0.651	SPPL3
0.717	-0.637	SELENOF
0.716	-0.635	SLC25A36
0.716	-0.637	SERTAD1
0.714	-0.639	PPDPF
0.713	-0.625	NBPF11
0.708	-0.632	GZMH
0.707	-0.612	NT5E
0.707	-0.627	PCBP2
0.701	-0.627	MT-ND5
0.697	-0.619	CFD
0.695	-0.618	FAM91A1
0.694	-0.615	RANBP2
0.694	-0.612	AP2S1
0.689	-0.609	AL138966.2
0.688	-0.618	BTG3
0.687	-0.603	RPL23A
0.687	-0.619	IQCB1
0.685	-0.612	RPS2
0.683	-0.601	CD27
0.67	-0.596	ADPGK
0.667	-0.595	AC092683.1
0.662	-0.591	RPS9
0.658	-0.583	NAPRT
0.652	-0.574	MRPL48
0.649	-0.576	ZNHIT1
0.648	-0.575	RFTN1
0.644	-0.575	CEP95
0.642	-0.571	ITGA2B
0.633	-0.565	SDE2
0.631	-0.555	SUSD6
0.628	-0.557	IKZF1
0.622	-0.562	ADIPOR2
0.619	-0.545	HAUS2
0.615	-0.54	PVT1
0.615	-0.551	STK10
0.613	-0.532	B3GNT8
0.611	-0.538	ZZEF1
0.611	-0.539	THUMPD1
0.611	-0.545	NKG7
0.608	-0.546	GIMAP1
0.606	-0.544	WHAMM
0.603	-0.532	MED14
0.602	-0.535	MAP3K8
0.601	-0.537	ATP5ME
0.6	-0.537	MT1X
0.6	-0.533	BCL7C
0.598	-0.526	STIM1
0.594	-0.525	ATAD2B
0.594	-0.532	CCNL1
0.592	-0.524	DNAJB6
0.592	-0.525	PLSCR3
0.591	-0.525	HSPH1
0.59	-0.522	RASGRF2
0.588	-0.525	RABGGTB
0.576	-0.511	IRF2BP2
0.569	-0.512	TNFSF13B
0.568	-0.499	MT1F
0.566	-0.499	UBQLN1
0.563	-0.502	CORO1A
0.563	-0.504	MAPK1IP1L
0.56	-0.497	TYW1B
0.559	-0.509	EIF2B1
0.556	-0.49	METTL17
0.555	-0.481	THEM6
0.554	-0.49	FKBP2
0.553	-0.492	CXorf38
0.552	-0.498	RNPC3
0.546	-0.491	RPS16
0.546	-0.482	SMIM27
0.542	-0.478	KLHL15
0.542	-0.483	CD53
0.535	-0.474	IQCG
0.533	-0.472	PIGG
0.532	-0.474	G3BP2
0.529	-0.471	KRR1
0.528	-0.468	PSMB8-AS1
0.528	-0.466	NKTR
0.526	-0.467	RIOK2
0.522	-0.459	TENT2
0.521	-0.469	GPATCH3
0.518	-0.464	SEC61B
0.516	-0.455	METTL15
0.515	-0.461	DDX18
0.513	-0.449	COMMD8
0.513	-0.442	NCOA2
0.512	-0.453	NCL
0.51	-0.461	DGKA
0.508	-0.451	AC245060.5
0.508	-0.443	SUCO
0.506	-0.461	ATP5PD
0.506	-0.446	EGR1
0.503	-0.453	NOCT
0.501	-0.449	TWF1
0.497	-0.441	AL353708.3
0.496	-0.455	HBA2
0.489	-0.428	ATP5MD
0.488	-0.438	MT-CYB
0.487	-0.439	PA2G4
0.485	-0.444	AP000845.1
0.483	-0.426	ZNF746
0.481	-0.431	CUL1
0.478	-0.428	HEATR1
0.477	-0.43	PPP1R16B
0.475	-0.423	SPON2
0.473	-0.414	LYRM4
0.472	-0.414	SMIM37
0.472	-0.424	YPEL5
0.471	-0.419	HNRNPH1
0.471	-0.419	PLK3
0.471	-0.424	DAZAP2
0.467	-0.42	THOC7
0.466	-0.403	BIRC6
0.465	-0.411	FTH1
0.462	-0.411	GAREM2
0.46	-0.404	CDKN1A
0.448	-0.404	TMEM35B
0.446	-0.391	CCNK
0.444	-0.395	UBR5
0.442	-0.392	ATG5
0.442	-0.382	INTS3
0.437	-0.396	SLC4A1
0.435	-0.39	KDM2A
0.433	-0.386	CXCR4
0.432	-0.383	RPL21
0.431	-0.376	PCED1B
0.43	-0.383	VASP
0.429	-0.378	SRSF2
0.429	-0.381	NOSIP
0.427	-0.378	TRAF3IP3
0.425	-0.37	UQCRB
0.424	-0.382	ZBTB1
0.419	-0.38	SELENBP1
0.418	-0.378	COX7C
0.414	-0.365	PDIA3
0.412	-0.37	LDHA
0.411	-0.362	BCL2
0.408	-0.358	IL4R
0.406	-0.358	LBH
0.403	-0.358	SCART1
0.401	-0.36	PPP1R15A
0.4	-0.358	LRRC59
0.395	-0.338	CAP1
0.393	-0.343	PLCXD2
0.392	-0.345	TM2D3
0.391	-0.346	UBA52
0.385	-0.345	CRIP1
0.381	-0.332	APRT
0.377	-0.33	DENND6A
0.375	-0.332	ITSN2
0.374	-0.344	REPIN1
0.372	-0.328	HMGN2
0.37	-0.323	PPM1M
0.368	-0.32	BAG6
0.365	-0.321	RPS18
0.361	-0.317	PPP4C
0.361	-0.319	NDUFB4
0.36	-0.332	AHSP
0.36	-0.32	AC010522.1
0.358	-0.318	PELI2
0.357	-0.32	ARL14EP
0.35	-0.309	RBM5
0.35	-0.313	MINOS1
0.348	-0.3	RECQL
0.348	-0.316	DDX5
0.347	-0.313	RNF4
0.341	-0.31	CD151
0.339	-0.303	CASP8
0.335	-0.292	TRIAP1
0.333	-0.293	SRCAP
0.331	-0.294	RPL6
0.33	-0.305	CTSH
0.328	-0.285	TSHZ2
0.325	-0.298	FNDC3A
0.322	-0.295	EWSR1
0.321	-0.294	HDAC10
0.32	-0.285	TAP1
0.318	-0.282	CCDC59
0.308	-0.266	MAFF
0.303	-0.284	AMD1
0.299	-0.269	MAP4K5
0.295	-0.268	AOAH
0.293	-0.268	TSPYL1
0.291	-0.268	P2RY8
0.287	-0.257	ATP5MPL
0.281	-0.25	CCT5
0.281	-0.25	PRPF8
0.279	-0.245	MORN2
0.276	-0.24	SYNE2
0.272	-0.244	TXNDC11
0.271	-0.234	PRPF4B
0.268	-0.237	UQCRFS1
0.268	-0.24	RALGAPA1
0.266	-0.234	RPL35A
0.264	-0.239	TSC22D2
0.259	-0.229	KLHL22
0.256	-0.226	RPS5
0.254	-0.234	PHF14
0.252	-0.236	PLK2
0.249	-0.219	BCLAF1
0.24	-0.205	ELP1
0.237	-0.203	PRMT1
0.237	-0.207	DDX20
0.235	-0.208	TCEAL8
0.225	-0.203	IDS
0.221	-0.19	CAMK4
0.218	-0.198	HLA-E
0.216	-0.192	RCN1
0.213	-0.191	PRELID1
0.212	-0.192	STK17B
0.211	-0.183	TMEM39A
0.211	-0.197	POU2F2
0.206	-0.181	RPS6KA3
0.2	-0.176	USP38
0.2	-0.178	LINC00265
0.199	-0.179	CA2
0.191	-0.169	RPL19
0.191	-0.174	METTL9
0.183	-0.162	POLR2L
0.18	-0.159	FAM111A
0.178	-0.158	TOB1
0.169	-0.151	TRGC2
0.165	-0.147	RPLP2
0.162	-0.141	RPL32
0.159	-0.14	FAM177A1
0.158	-0.139	SRRM1
0.158	-0.143	ZNF335
0.156	-0.133	SARAF
0.153	-0.13	SNRPD3
0.152	-0.132	CAPRIN1
0.148	-0.13	EDF1
0.148	-0.133	FNBP4
0.141	-0.122	ZDHHC20
0.136	-0.124	MALAT1
0.134	-0.12	TRAF6
0.134	-0.124	EIF3E
0.132	-0.127	NAP1L1
0.129	-0.11	AL355472.1
0.124	-0.0951	CXCR6
0.124	-0.107	RPS6KA5
0.12	-0.108	NXF1
0.119	-0.104	NDUFA1
0.116	-0.113	CR1
0.114	-0.0976	RPL18A
0.111	-0.092	AKIRIN1
0.108	-0.0892	TTC9
0.108	-0.0985	BUD31
0.108	-0.101	RSBN1L
0.106	-0.101	ZEB2
0.104	-0.0976	DDX17
0.104	-0.0928	RPL29
0.101	-0.0886	PCGF5
0.1	-0.0907	SBDS
0.0999	-0.0925	EIF4A3
0.0983	-0.0853	AHSA1
0.0973	-0.0875	COX6B1
0.0914	-0.0798	PLXNA4
0.0911	-0.076	ATP5PF
0.0895	-0.0775	SYT11
0.0845	-0.0699	RXRB
0.082	-0.0709	SHISAL2A
0.078	-0.0665	RBM19
0.0753	-0.0705	CDC37L1
0.0741	-0.0692	AL662844.4
0.0736	-0.0646	RPL39
0.0728	-0.0617	RPS28
0.0677	-0.0605	CHD1
0.0675	-0.0595	SUMO2
0.0671	-0.0546	LSM2
0.0665	-0.0547	ARNTL
0.0659	-0.0678	SNCA
0.0632	-0.0544	RPL3
0.0619	-0.0457	SLC35D2
0.0606	-0.0534	ATG14
0.0591	-0.0553	SERP1
0.0551	-0.0481	SLC6A6
0.0516	-0.0608	TNFRSF18
0.049	-0.0496	RGPD5
0.0485	-0.0404	BTBD9
0.046	-0.0402	RTF1
0.0426	-0.0426	HINT1
0.0404	-0.0367	TMEM147
0.0388	-0.0326	RHOA
0.035	-0.036	RGMB
0.0292	-0.0278	RPL22L1
0.0275	-0.0347	LINC00324
0.0228	-0.0152	CDK17
0.0222	-0.021	GPRC5B
0.0192	-0.0256	DNAJC15
0.014	-0.0136	EEF1A1
0.0133	-0.0136	POLR2E
0.0115	-0.0103	POLR3K
0.00871	-0.0141	PABPN1
0.0069	-0.00848	MED21
0.00354	-0.00413	MON2
0.00346	0.000667	RNF123
0.00197	-0.00236	SGK1
0.000666	0.00101	RPS15
-0.00136	0.00998	NUP133
-0.0019	0.00107	ATP5F1E
-0.00316	0.0013	NR4A2
-0.00465	0.00818	SUSD3
-0.00945	0.0141	RAP2C
-0.0117	0.00249	RPL26
-0.0137	0.00197	HBM
-0.0155	0.0162	LEF1
-0.016	0.0102	LTBP4
-0.0162	0.0162	RPL22
-0.02	0.0136	MAP3K4
-0.0223	0.0149	CFLAR
-0.0228	0.0169	ZBP1
-0.0262	0.028	PARP1
-0.0264	0.0195	IL7R
-0.0393	0.0313	TPI1
-0.0429	0.0388	ETFDH
-0.0444	0.0394	ORMDL2
-0.0486	0.041	CHIC2
-0.0499	0.0488	THAP2
-0.0517	0.0487	ARHGDIB
-0.0527	0.0442	PLCG1
-0.0528	0.0532	ZNF736
-0.0577	0.044	YY1
-0.0584	0.057	MFSD14A
-0.0587	0.0488	HERPUD2
-0.06	0.0631	ASH1L-AS1
-0.0629	0.0652	MRPS33
-0.0636	0.0554	GABPB1
-0.0646	0.0592	RPS12
-0.0684	0.0629	RPS15A
-0.0762	0.0654	EBPL
-0.0776	0.0802	TMEM250
-0.0795	0.0694	ITM2A
-0.0804	0.0787	ZNF160
-0.0806	0.0701	RPL13
-0.0815	0.0725	AC243960.1
-0.0874	0.0849	IL27RA
-0.0909	0.0745	CCDC115
-0.0916	0.0748	MPLKIP
-0.0935	0.0821	TRAPPC6A
-0.0996	0.0852	EHD1
-0.101	0.0933	YTHDF3
-0.106	0.0962	SFSWAP
-0.121	0.108	TNFRSF10D
-0.124	0.107	LDHB
-0.124	0.114	AC016831.7
-0.125	0.123	ZNF862
-0.125	0.11	RPL12
-0.129	0.123	PURA
-0.129	0.112	CYTIP
-0.13	0.12	LCP1
-0.13	0.112	PIGBOS1
-0.135	0.126	KDM4C
-0.137	0.117	SLC35E2B
-0.139	0.133	U2AF1L5
-0.14	0.119	B3GALT6
-0.142	0.13	RPL13A
-0.144	0.137	IVNS1ABP
-0.147	0.133	TP53INP2
-0.148	0.142	CHRM3-AS2
-0.149	0.126	FCGBP
-0.151	0.14	CXCR3
-0.152	0.141	FAM50A
-0.153	0.136	CCNT1
-0.158	0.145	LINC02384
-0.159	0.139	IDI1
-0.161	0.134	TRAV8-2
-0.163	0.147	SRSF3
-0.166	0.152	PSME1
-0.17	0.149	CST7
-0.171	0.16	STK38
-0.171	0.157	UTRN
-0.175	0.15	RPL31
-0.176	0.16	ZNF692
-0.177	0.167	CABIN1
-0.181	0.162	NDUFB1
-0.183	0.163	PPP6R2
-0.184	0.166	POFUT2
-0.186	0.17	SELENOM
-0.186	0.168	CD69
-0.192	0.165	ELOVL4
-0.194	0.175	SH3GL1
-0.198	0.177	CPT1A
-0.2	0.179	CELF2
-0.202	0.174	EHD4
-0.205	0.185	KHDRBS1
-0.206	0.186	PDCD6
-0.208	0.182	KIF19
-0.212	0.184	KLF6
-0.213	0.187	RPL35
-0.213	0.189	DOCK10
-0.217	0.185	ANXA2
-0.217	0.193	PRH1
-0.221	0.195	RGS10
-0.225	0.206	CMPK2
-0.228	0.201	RPS27
-0.229	0.209	RPL38
-0.23	0.212	RPS24
-0.231	0.206	ADGRG1
-0.231	0.208	MRPL10
-0.232	0.206	COPS9
-0.237	0.217	PSMB10
-0.239	0.219	SPAG9
-0.259	0.238	LINC02446
-0.261	0.236	ITGB2
-0.266	0.23	RHOF
-0.269	0.24	RPS25
-0.272	0.242	HIST1H4C
-0.273	0.243	SLC1A4
-0.273	0.24	EP300
-0.277	0.244	TNFRSF10B
-0.281	0.249	RPS29
-0.284	0.252	BHLHE40
-0.291	0.261	KRT72
-0.292	0.266	AKTIP
-0.294	0.262	DBP
-0.295	0.26	TOE1
-0.3	0.269	CARS
-0.301	0.261	RIOK3
-0.304	0.269	GTF2H5
-0.306	0.274	VPS35
-0.307	0.27	ME3
-0.308	0.274	TWISTNB
-0.317	0.285	RCE1
-0.32	0.283	AC092117.1
-0.322	0.293	OGA
-0.326	0.285	RASSF1
-0.328	0.297	SDCBP2-AS1
-0.331	0.291	RABGAP1L
-0.332	0.292	NXT1
-0.335	0.296	KLRD1
-0.337	0.3	AIF1
-0.338	0.294	PPA1
-0.338	0.299	RPL27A
-0.338	0.3	TMEM222
-0.339	0.304	RPL34
-0.346	0.304	RHOG
-0.346	0.308	RPL27
-0.354	0.327	PARVB
-0.354	0.325	C1RL-AS1
-0.358	0.328	PLPP1
-0.359	0.323	TARSL2
-0.363	0.322	SNTB2
-0.364	0.318	ZNF92
-0.365	0.326	SEC62
-0.366	0.323	SNRPF
-0.373	0.333	EIF3L
-0.376	0.335	POLR2M
-0.381	0.347	NECAP1
-0.382	0.341	EIF3G
-0.391	0.358	NDFIP1
-0.392	0.356	TMSB4X
-0.395	0.355	JUNB
-0.397	0.353	NCF1
-0.397	0.34	PET100
-0.4	0.357	LST1
-0.403	0.357	VCPKMT
-0.405	0.35	SLC5A6
-0.407	0.361	HELLS
-0.408	0.362	SECISBP2
-0.408	0.362	S1PR4
-0.413	0.366	RPS21
-0.417	0.37	MRFAP1L1
-0.419	0.374	SNAI1
-0.42	0.375	TWF2
-0.421	0.372	CYBA
-0.423	0.383	RBM39
-0.423	0.377	RPL28
-0.427	0.375	PPP3CC
-0.427	0.389	CKS1B
-0.427	0.388	DPY30
-0.43	0.381	SUN2
-0.437	0.386	RBM8A
-0.438	0.396	MBNL2
-0.44	0.394	CAPZB
-0.441	0.391	TBC1D22B
-0.442	0.397	WDR36
-0.443	0.395	MCL1
-0.46	0.411	SMS
-0.468	0.418	MT-ND3
-0.469	0.417	CD79A
-0.472	0.428	STX8
-0.476	0.427	SDHAF1
-0.476	0.422	GPBP1L1
-0.48	0.432	RPLP1
-0.481	0.434	BRIX1
-0.482	0.43	TMEM259
-0.483	0.426	PPP1CB
-0.487	0.435	RPS19
-0.49	0.43	SRRT
-0.493	0.443	AP005329.1
-0.495	0.443	UPF3A
-0.495	0.442	KLF10
-0.497	0.447	TRAPPC9
-0.5	0.451	SEMA4A
-0.504	0.451	RPL37A
-0.506	0.452	RNF19A
-0.508	0.456	ACAD11
-0.508	0.459	PRKAR2B
-0.508	0.454	STAT4
-0.508	0.452	IFRD1
-0.511	0.454	ATP5MG
-0.512	0.455	CRTC3
-0.517	0.47	AAED1
-0.52	0.458	RPL4
-0.521	0.464	RPL15
-0.522	0.468	PBRM1
-0.523	0.467	KCNAB2
-0.526	0.47	NDUFA8
-0.529	0.476	ANKRD36C
-0.53	0.48	HSP90AB1
-0.533	0.473	BTG2
-0.536	0.475	SLC38A6
-0.536	0.469	HIF1A
-0.537	0.471	COA3
-0.537	0.477	ANXA5
-0.544	0.489	HIPK1
-0.553	0.495	SELENOO
-0.555	0.492	COTL1
-0.558	0.497	EIF3F
-0.561	0.5	DHRS7
-0.563	0.506	HNRNPUL2-BSCL2
-0.563	0.507	ZNF184
-0.566	0.506	RPL23
-0.567	0.512	AP1M1
-0.569	0.513	CLU
-0.575	0.509	PSMB3
-0.582	0.523	RAD51C
-0.587	0.522	RPS23
-0.587	0.519	PARK7
-0.588	0.527	UBE2L6
-0.593	0.532	ZC3H12A
-0.594	0.526	SNRNP70
-0.597	0.526	SLAMF1
-0.599	0.519	MIR22HG
-0.6	0.527	BNIP1
-0.603	0.538	NECAP2
-0.605	0.544	NIN
-0.605	0.53	RALY
-0.606	0.548	PRKCH
-0.608	0.538	IGHA1
-0.61	0.541	SMG1
-0.612	0.55	CNOT4
-0.613	0.543	TMEM179B
-0.614	0.55	RBL1
-0.614	0.55	SBNO2
-0.614	0.554	SCAMP3
-0.617	0.562	AARS2
-0.617	0.553	BRD4
-0.618	0.553	FKBP5
-0.619	0.548	CPSF2
-0.619	0.549	RPS11
-0.625	0.552	CCT8
-0.627	0.556	FOS
-0.629	0.564	RAD1
-0.631	0.561	PHB
-0.633	0.57	BLK
-0.636	0.566	EDA
-0.638	0.58	ATG9A
-0.639	0.573	CAPG
-0.643	0.575	HNRNPDL
-0.646	0.58	SMIM30
-0.646	0.583	SEPHS2
-0.649	0.577	TRAF4
-0.649	0.575	CFL1
-0.656	0.581	SUFU
-0.657	0.588	GPR171
-0.657	0.579	INTS12
-0.658	0.576	HNRNPC
-0.663	0.584	CSK
-0.663	0.586	GTF3C1
-0.666	0.595	EIF6
-0.667	0.595	MRPL51
-0.682	0.607	IFNG
-0.685	0.61	ERH
-0.689	0.617	PCMTD2
-0.69	0.615	ATP6V0E1
-0.703	0.623	RBPJ
-0.706	0.632	AVPI1
-0.712	0.632	DDX6
-0.713	0.639	RPS17
-0.722	0.639	LSR
-0.723	0.644	PROK2
-0.727	0.651	TMEM204
-0.728	0.647	RNMT
-0.729	0.65	NISCH
-0.729	0.647	GRHPR
-0.732	0.659	HDGFL2
-0.74	0.657	NCR1
-0.741	0.657	CCAR2
-0.747	0.667	ACADM
-0.749	0.664	SCOC
-0.751	0.67	OCIAD2
-0.753	0.663	GOLGA4
-0.754	0.665	RBX1
-0.755	0.671	ACTG1
-0.757	0.677	SEC14L1
-0.769	0.677	CALHM2
-0.769	0.687	CBX1
-0.77	0.685	FOXO1
-0.771	0.683	AC136475.5
-0.774	0.699	TAGLN2
-0.777	0.689	ZNF480
-0.778	0.694	TPT1
-0.78	0.689	DPP4
-0.78	0.688	LTB
-0.782	0.699	FHIT
-0.785	0.699	CCNH
-0.787	0.702	OST4
-0.789	0.707	ZYX
-0.794	0.701	GNG10
-0.798	0.709	AFF4
-0.815	0.723	CPNE3
-0.82	0.739	ILK
-0.823	0.727	DBF4
-0.829	0.738	ZNF683
-0.832	0.745	MAU2
-0.833	0.741	TIMM8B
-0.837	0.743	PRDX1
-0.84	0.752	CD8B
-0.844	0.743	TNFSF9
-0.844	0.747	RSRC2
-0.849	0.756	ZFX
-0.85	0.75	DYNC1I2
-0.853	0.761	KCNA3
-0.855	0.756	DEK
-0.856	0.758	MOAP1
-0.858	0.771	CD200R1
-0.86	0.768	LIMD2
-0.862	0.768	USP16
-0.862	0.767	ATP6V1G1
-0.866	0.767	USO1
-0.867	0.776	ARHGAP33
-0.87	0.777	IL17RA
-0.871	0.776	RSU1
-0.872	0.781	NR2C1
-0.872	0.765	PSMB9
-0.873	0.781	FAM241A
-0.879	0.782	RPL37
-0.882	0.795	DDX21
-0.884	0.787	FMNL1
-0.886	0.793	HMCES
-0.887	0.787	GANAB
-0.889	0.789	RPS26
-0.893	0.8	SEC24B
-0.9	0.804	RPL10A
-0.903	0.808	ZNF26
-0.904	0.804	MAT2B
-0.905	0.815	SETD2
-0.91	0.797	FAM129A
-0.911	0.814	GPR107
-0.924	0.831	CXXC5
-0.926	0.829	NDUFB3
-0.93	0.831	ENDOG
-0.938	0.836	TSR3
-0.938	0.837	IRF1
-0.944	0.848	AP4B1
-0.944	0.847	GHITM
-0.945	0.846	CEACAM1
-0.952	0.85	TAF11
-0.955	0.847	BBOF1
-0.957	0.855	MYCBP
-0.959	0.85	FGFBP2
-0.96	0.864	CD248
-0.965	0.857	HMGCS1
-0.966	0.861	AP3M2
-0.968	0.862	SLC39A9
-0.97	0.865	SLC16A3
-0.971	0.881	TRAV1-2
-0.978	0.876	PSMB7
-0.978	0.871	TRGV2
-0.979	0.877	TC2N
-0.983	0.881	GSDMD
-0.989	0.885	SLFN12L
-0.994	0.888	PPBP
-0.997	0.888	MACF1
-1	0.896	PRSS23
-1.01	0.898	CENPC
-1.01	0.902	SERTAD3
-1.01	0.895	CTNNB1
-1.02	0.916	DUSP2
-1.03	0.925	IRF2
-1.03	0.913	TUBA1A
-1.04	0.932	KLRK1
-1.04	0.933	ARL4A
-1.04	0.925	SMARCA2
-1.05	0.935	RPS14
-1.05	0.929	WDR4
-1.06	0.948	AGFG2
-1.06	0.942	DCTN2
-1.06	0.953	AC139720.1
-1.06	0.945	CNST
-1.06	0.948	STK4
-1.06	0.945	JMJD1C
-1.07	0.95	MED6
-1.07	0.959	FAM110A
-1.07	0.949	CD74
-1.07	0.953	PPP2CA
-1.08	0.969	GATD3A
-1.08	0.958	CD82
-1.09	0.974	SET
-1.09	0.969	MT-CO3
-1.09	0.972	USP9Y
-1.09	0.971	ORAI1
-1.11	0.981	EIF5
-1.11	0.985	CHKA
-1.12	1	SKIL
-1.12	0.999	TMEM168
-1.12	1	SELPLG
-1.13	1	DDX47
-1.13	1.02	MT2A
-1.13	1.02	CPD
-1.13	1.01	MZF1-AS1
-1.13	1	FCMR
-1.14	1.02	REL
-1.15	1.03	ERAP1
-1.15	1.02	ARID5A
-1.15	1.04	GORASP2
-1.16	1.04	MT-ND4
-1.16	1.03	ORMDL3
-1.17	1.04	MRPS18B
-1.17	1.04	RACK1
-1.17	1.04	TSTD1
-1.18	1.05	APBB1IP
-1.19	1.07	TPP2
-1.19	1.06	FRAT2
-1.19	1.04	FUT7
-1.2	1.07	RNF138
-1.21	1.08	CAND1
-1.21	1.07	TSC22D4
-1.21	1.07	HABP4
-1.21	1.08	ABHD10
-1.21	1.07	CAPNS1
-1.22	1.08	GNB1
-1.22	1.08	CBR1
-1.23	1.1	NBEAL1
-1.23	1.1	PPP1R15B
-1.24	1.11	VAMP8
-1.24	1.11	EIF2S2
-1.24	1.11	DYRK2
-1.24	1.11	RGS16
-1.25	1.13	UPF2
-1.25	1.12	RNF114
-1.25	1.12	CD8B2
-1.26	1.13	SRI
-1.26	1.12	ADTRP
-1.27	1.12	HIKESHI
-1.27	1.12	TMEM102
-1.27	1.12	PDRG1
-1.27	1.12	TESC
-1.28	1.14	TUT4
-1.29	1.15	HNRNPU
-1.3	1.15	FAM102A
-1.3	1.16	SEC16A
-1.3	1.16	ATP2B1-AS1
-1.3	1.16	TRBV7-3
-1.31	1.17	S100A10
-1.31	1.17	SLC7A5
-1.31	1.17	ATF3
-1.32	1.18	LPAR5
-1.32	1.17	CLEC2B
-1.34	1.2	PHYKPL
-1.34	1.2	LRRN3
-1.34	1.19	AL158152.1
-1.34	1.19	TMA7
-1.35	1.21	SIN3B
-1.37	1.22	CSTB
-1.37	1.23	EXOC4
-1.37	1.22	CFDP1
-1.38	1.23	RPS6
-1.38	1.23	TKT
-1.39	1.24	MT-CO1
-1.39	1.23	HIST1H2AC
-1.39	1.24	ICAM2
-1.4	1.25	B3GNT2
-1.4	1.24	ENC1
-1.4	1.26	TREML1
-1.4	1.24	LSM6
-1.4	1.26	HBS1L
-1.41	1.26	BIRC2
-1.42	1.27	ZNF665
-1.42	1.27	GNB2
-1.42	1.25	DDX60L
-1.43	1.28	HDDC2
-1.43	1.27	EID1
-1.44	1.28	GZMB
-1.46	1.3	GPR25
-1.46	1.3	RCSD1
-1.46	1.31	MRPS6
-1.47	1.32	HNRNPAB
-1.47	1.3	ZFAND6
-1.48	1.33	TRAPPC12
-1.49	1.32	CTDSP1
-1.49	1.32	EMP3
-1.5	1.34	SLC9A3R1
-1.52	1.35	VBP1
-1.52	1.35	RABL6
-1.52	1.35	HUS1
-1.52	1.35	CCDC84
-1.53	1.35	GIMAP5
-1.53	1.37	ITPR3
-1.54	1.37	MTCH2
-1.54	1.37	CYB5B
-1.56	1.39	TNFAIP8
-1.56	1.39	BCAS2
-1.57	1.4	SDHC
-1.57	1.39	RAP1A
-1.57	1.4	NEAT1
-1.6	1.42	ITK
-1.6	1.43	OSTC
-1.61	1.43	AC016773.1
-1.61	1.43	STK17A
-1.61	1.42	MAP2K2
-1.61	1.44	MAP1LC3B
-1.62	1.43	APEX1
-1.63	1.46	OCEL1
-1.63	1.45	ANK3
-1.64	1.46	HSPA5
-1.65	1.47	MAP7D1
-1.65	1.46	SETD9
-1.66	1.48	GNAI2
-1.66	1.48	RALBP1
-1.66	1.48	COPZ1
-1.66	1.48	FP565260.1
-1.67	1.49	HIST2H2AC
-1.67	1.49	RNF10
-1.67	1.48	PCBP1
-1.67	1.5	HMGXB3
-1.67	1.5	AC016831.1
-1.69	1.5	MRPS30
-1.69	1.51	FYB1
-1.7	1.52	SRM
-1.7	1.51	PTPN18
-1.7	1.52	TOMM7
-1.71	1.53	TUBB1
-1.72	1.54	AGTPBP1
-1.72	1.53	CWC25
-1.73	1.54	TRAPPC5
-1.74	1.55	FMC1
-1.74	1.55	PFDN5
-1.75	1.56	HOPX
-1.75	1.56	NDUFB2
-1.75	1.56	DUSP1
-1.75	1.56	CAPN2
-1.75	1.55	USP36
-1.76	1.58	NCALD
-1.76	1.57	PTP4A2
-1.76	1.55	ZNF507
-1.77	1.57	MVB12A
-1.78	1.6	MNDA
-1.78	1.58	MT-ND1
-1.78	1.59	GPCPD1
-1.79	1.59	TUBB
-1.79	1.59	CNOT1
-1.79	1.59	PLPBP
-1.79	1.59	ANAPC13
-1.79	1.59	CITED4
-1.8	1.61	STT3B
-1.8	1.6	NMT2
-1.82	1.63	LMNA
-1.82	1.62	ITGAM
-1.83	1.64	TBC1D22A
-1.83	1.63	RAB31
-1.83	1.63	EDAR
-1.85	1.64	CNN2
-1.85	1.65	LYPLA2
-1.85	1.65	FHL1
-1.86	1.65	LPXN
-1.87	1.66	CLSTN1
-1.88	1.67	TMEM243
-1.88	1.67	NFU1
-1.88	1.67	LGALS3
-1.89	1.68	SLC20A1
-1.89	1.68	OTUD6B-AS1
-1.9	1.7	EIF5B
-1.91	1.7	CYTH3
-1.92	1.7	ECH1
-1.92	1.71	SARS
-1.93	1.72	ZBTB40
-1.93	1.73	FKBP4
-1.93	1.72	PINK1
-1.93	1.73	GRASP
-1.93	1.72	ACTR3
-1.93	1.71	CD14
-1.94	1.73	CPSF6
-1.95	1.73	UBR2
-1.95	1.74	LMTK2
-1.95	1.74	DDIT4-AS1
-1.96	1.76	RBBP6
-1.96	1.74	NUDT5
-1.96	1.74	PLEKHM1
-1.96	1.75	RRBP1
-1.97	1.76	CCR2
-1.98	1.76	TAF7
-1.99	1.77	EXOC3
-2.01	1.78	RGS1
-2.01	1.78	BRK1
-2.01	1.79	ANXA6
-2.01	1.79	SHOC2
-2.01	1.8	BCL11B
-2.02	1.8	ATP5F1B
-2.02	1.8	UFSP2
-2.02	1.8	NEDD9
-2.02	1.8	PHC3
-2.03	1.81	MZT2B
-2.03	1.8	EIF3B
-2.03	1.81	BLOC1S6
-2.03	1.81	IGLV6-57
-2.04	1.82	GATD3B
-2.05	1.82	ZFP90
-2.06	1.84	HSP90AA1
-2.08	1.85	BUB3
-2.08	1.86	SPARC
-2.11	1.89	CCR7
-2.11	1.87	MID1IP1
-2.11	1.88	DEXI
-2.12	1.89	NENF
-2.13	1.9	ISG15
-2.14	1.9	TRBC1
-2.15	1.91	LAMTOR2
-2.15	1.92	ISCA2
-2.16	1.92	CD55
-2.17	1.93	IMP3
-2.17	1.93	ABRACL
-2.17	1.94	GNG2
-2.19	1.94	CHMP4B
-2.19	1.96	CFAP97
-2.19	1.95	MT-ND2
-2.21	1.97	EI24
-2.22	1.98	EIF4H
-2.22	1.98	ARPC5
-2.23	1.99	PTGS1
-2.23	1.99	COX7A2L
-2.23	1.98	AFF1
-2.23	1.99	RUVBL1
-2.24	1.99	CBWD5
-2.25	2	DDX39B
-2.26	2.01	SF3B1
-2.28	2.03	SLC4A10
-2.28	2.04	ANXA11
-2.29	2.04	TMEM50B
-2.29	2.05	RPS20
-2.29	2.03	CUL4A
-2.29	2.04	STK24
-2.3	2.05	TRIM69
-2.32	2.07	ASTE1
-2.33	2.07	TXNL4A
-2.35	2.09	PDE6D
-2.35	2.09	HSPA1A
-2.4	2.13	GIMAP2
-2.4	2.14	ABLIM1
-2.42	2.16	GBP2
-2.42	2.15	HSBP1
-2.43	2.16	HLA-B
-2.44	2.17	TAGAP
-2.45	2.18	AC211476.2
-2.46	2.19	UXT
-2.46	2.19	CEBPD
-2.47	2.2	GALM
-2.47	2.2	CRACR2B
-2.48	2.21	THAP11
-2.48	2.2	CCDC144A
-2.49	2.22	PTEN
-2.49	2.23	SRGAP2C
-2.5	2.23	SLC7A8
-2.51	2.22	TMED2
-2.51	2.24	GRK5
-2.51	2.23	RHOB
-2.53	2.25	ELP5
-2.54	2.26	HIST1H4A
-2.54	2.26	CCDC163
-2.55	2.26	CORO2A
-2.58	2.3	YTHDC2
-2.6	2.32	ZSCAN16-AS1
-2.61	2.32	RASGEF1B
-2.61	2.33	GIMAP7
-2.61	2.33	TMEM203
-2.61	2.32	CKS2
-2.62	2.33	FDFT1
-2.64	2.34	IKBIP
-2.65	2.36	MBIP
-2.66	2.37	HNRNPF
-2.66	2.37	TRMT112
-2.66	2.37	HLA-DRA
-2.66	2.37	ID3
-2.67	2.38	LINC00685
-2.69	2.39	GSK3A
-2.69	2.4	ABCC1
-2.69	2.39	CD2
-2.7	2.4	AIP
-2.72	2.42	R3HDM4
-2.72	2.43	CLEC11A
-2.74	2.44	GIMAP4
-2.74	2.44	U2AF1
-2.76	2.45	PRKCA
-2.76	2.46	LDLR
-2.77	2.47	SKAP2
-2.78	2.47	GNL3
-2.82	2.52	TUBB2A
-2.84	2.52	RETREG1
-2.84	2.53	ANKHD1
-2.84	2.53	DHRS13
-2.84	2.54	ZFP36L1
-2.84	2.53	CAPZA2
-2.86	2.54	AHCYL1
-2.87	2.55	ZNF460
-2.93	2.6	ERAP2
-2.93	2.61	ARHGAP15
-2.94	2.61	RAP2B
-2.95	2.63	KIF1B
-2.95	2.63	ERGIC1
-2.95	2.62	INTS5
-2.98	2.66	ZNF706
-2.99	2.66	ING4
-2.99	2.68	GIMAP6
-3.01	2.69	FADD
-3.02	2.7	ZMAT2
-3.03	2.7	CDKN1B
-3.04	2.71	IMMP1L
-3.08	2.74	PLEKHO1
-3.1	2.76	FCN1
-3.1	2.77	ZNF22
-3.13	2.79	ZBTB16
-3.13	2.78	DDIT3
-3.14	2.81	ARIH1
-3.14	2.81	NCR3
-3.15	2.8	EVI2A
-3.16	2.81	AL031963.3
-3.17	2.81	CMTM7
-3.18	2.83	EPRS
-3.19	2.85	CITED2
-3.19	2.85	SPATC1L
-3.2	2.85	IL16
-3.2	2.85	MRPL50
-3.2	2.85	HRASLS2
-3.21	2.85	SLFN5
-3.23	2.88	RNF5
-3.23	2.87	HNRNPD
-3.23	2.88	STMN1
-3.24	2.89	KIF5C
-3.25	2.9	AC093323.1
-3.28	2.91	GLS
-3.3	2.94	PARP15
-3.32	2.96	RBMS1
-3.33	2.96	CPQ
-3.34	2.98	LINC02273
-3.38	3	LHPP
-3.38	3.01	KLF2
-3.39	3.01	PDCD7
-3.4	3.03	CALM2
-3.41	3.05	KRCC1
-3.42	3.04	SREK1
-3.42	3.05	FCER1G
-3.45	3.08	SORCS3
-3.48	3.09	RPA2
-3.49	3.11	CRIP2
-3.49	3.11	CNOT11
-3.5	3.11	LYZ
-3.51	3.12	HNRNPL
-3.6	3.19	NCF2
-3.63	3.23	UBE2I
-3.63	3.23	CCDC61
-3.65	3.25	SCCPDH
-3.66	3.27	MRPL24
-3.68	3.28	MEN1
-3.68	3.28	ABO
-3.72	3.31	TAF10
-3.76	3.34	ZFY
-3.8	3.39	GBP4
-3.8	3.39	OLFM2
-3.83	3.41	PF4V1
-3.85	3.43	RGS18
-3.86	3.44	SMAP2
-3.86	3.43	TYROBP
-3.86	3.44	THEMIS2
-3.87	3.44	CCNG2
-3.87	3.45	CHURC1
-3.91	3.48	CAVIN2
-3.97	3.53	HPGD
-3.97	3.53	LINC00278
-3.98	3.54	MAP2K4
-4.04	3.6	NOG
-4.07	3.62	NRGN
-4.07	3.62	SLC2A3
-4.08	3.64	MEAF6
-4.08	3.64	MAP3K7CL
-4.14	3.69	LY86
-4.15	3.7	SERPINA1
-4.16	3.71	GCC2
-4.19	3.74	HOXB2
-4.22	3.74	NSMCE3
-4.23	3.76	HIST2H2AA4
-4.29	3.81	NUDT2
-4.32	3.84	CTCF
-4.37	3.89	TNFRSF1A
-4.37	3.89	MSH2
-4.42	3.93	MT-ATP8
-4.53	4.03	H1FX
-4.6	4.09	TRDV2
-4.68	4.16	HIST1H1D
-4.9	4.36	ICOS
-4.9	4.36	DNLZ
-4.9	4.36	LEPROT
-4.99	4.45	ZNF677
-5.12	4.56	AKAP11
-5.2	4.63	SH3YL1
-5.23	4.66	LGALS2
-5.32	4.75	A1BG
-5.41	4.81	DDX3Y
-5.56	4.96	POMC
-5.62	5	GOLGA8B
-5.68	5.07	KDM5D
-5.69	5.07	GNG11
-5.89	5.25	PF4
-6.17	5.49	UTY
-6.26	5.58	TTTY15
-6.36	5.67	HIST1H1C
-7.04	6.27	CSF3R
-7.1	6.32	KLRC1
-7.15	6.37	ZBTB7A
-7.22	6.44	S100A12
-7.31	6.52	SPI1
-7.75	6.9	EIF1AY
-8.05	7.17	S100A8
-8.47	7.54	S100A9
-8.91	7.92	RPS4Y1
