# Supplementary material for: Linking COVID-19 to Neurodegeneration: A Single-Cell Deep Learning Study of PBMCs in Multiple Sclerosis and Alzheimer’s Disease
Source: Research Square preprint supplement (doi:10.21203/rs.3.rs-7342199/v1), 2025-10-08
Supplement: Supplementary file 7 [file b24ab692c8e0fd09f9e03340.xlsx]

## Sheet: Sheet1
Table5. sorted_data_B_cell_MS
Class0	Class1	gene
0.569	-0.455	NBEAL1
0.46	-0.369	TMSB4X
0.454	-0.363	IGKC
0.404	-0.327	HLA-DRB5
0.393	-0.316	TIPIN
0.387	-0.31	ZNF90
0.356	-0.285	XIST
0.347	-0.28	IGLC2
0.346	-0.274	C1orf56
0.34	-0.275	POLR2J3
0.336	-0.27	HLA-DQA2
0.315	-0.252	NACA2
0.311	-0.252	NAP1L1
0.298	-0.239	CD79B
0.29	-0.232	IGHD
0.284	-0.227	C6orf62
0.282	-0.226	FAM184B
0.277	-0.224	NHSL2
0.277	-0.224	GABPB1-AS1
0.277	-0.223	C6orf48
0.272	-0.219	NPFFR1
0.271	-0.217	ATXN8OS
0.27	-0.217	EIF3E
0.269	-0.217	PLAC8
0.268	-0.216	GRHL1
0.263	-0.21	DUSP18
0.262	-0.212	PCSK7
0.258	-0.206	FAM215B
0.255	-0.201	MDM4
0.254	-0.202	MPV17L
0.253	-0.205	CLEC2D
0.251	-0.2	CNKSR3
0.239	-0.194	SLC16A1-AS1
0.235	-0.188	SLC51A
0.232	-0.188	ANKRD42
0.231	-0.186	IGLC3
0.228	-0.182	HLA-DRA
0.228	-0.187	FERMT2
0.227	-0.185	SBF2
0.225	-0.179	AC245100.1
0.224	-0.18	GPR85
0.215	-0.175	UQCRB
0.211	-0.17	PSMA3-AS1
0.211	-0.166	TSIX
0.211	-0.169	UQCRHL
0.208	-0.166	TTLL7
0.208	-0.165	UBB
0.208	-0.164	P2RX5
0.207	-0.166	S1PR3
0.205	-0.165	PSMA4
0.205	-0.167	EVI2B
0.204	-0.161	HNRNPA1L2
0.204	-0.164	HSPA14
0.201	-0.159	C16orf54
0.198	-0.16	IGHM
0.198	-0.16	HLA-DQB2
0.196	-0.156	ZNF843
0.196	-0.159	APOPT1
0.193	-0.156	CALM2
0.191	-0.154	AC159540.1
0.191	-0.153	GABPB1
0.19	-0.154	PRPSAP1
0.189	-0.151	SLC26A2
0.188	-0.155	ZNF32
0.186	-0.15	COMMD7
0.183	-0.151	UBA52
0.182	-0.146	RBX1
0.181	-0.143	PHKG1
0.18	-0.143	PTPRH
0.179	-0.141	MRPL12
0.178	-0.143	IFI16
0.177	-0.143	GGPS1
0.177	-0.142	BCO2
0.173	-0.14	NDUFB8
0.173	-0.137	ZNF397
0.17	-0.13	MALAT1
0.168	-0.135	TRIM72
0.168	-0.135	BIRC3
0.167	-0.135	RNASE6
0.166	-0.131	SCYL1
0.165	-0.13	DNAAF1
0.162	-0.131	TLR10
0.161	-0.127	ARPC1A
0.16	-0.128	COMMD1
0.159	-0.128	ZFAND6
0.159	-0.129	MZT2B
0.158	-0.128	TOMM7
0.156	-0.128	H3F3C
0.156	-0.124	B3GAT2
0.155	-0.124	NDUFA11
0.154	-0.122	SYNJ2BP
0.154	-0.127	ANGPT2
0.154	-0.125	SLC16A4
0.154	-0.125	PREB
0.153	-0.126	CBWD3
0.153	-0.125	SPSB3
0.152	-0.122	PAIP2
0.152	-0.122	CHMP4A
0.151	-0.125	VPREB3
0.151	-0.123	N4BP2L2
0.149	-0.121	COLEC12
0.148	-0.123	HNRNPH1
0.148	-0.117	MAPRE1
0.147	-0.118	COMMD3
0.147	-0.119	TTC7B
0.146	-0.118	ANXA2
0.146	-0.116	STX7
0.146	-0.119	B2M
0.145	-0.114	CMTM6
0.145	-0.117	CNPY2
0.145	-0.118	SUB1
0.145	-0.117	HSPA9
0.144	-0.117	PTPMT1
0.144	-0.112	CLPB
0.144	-0.116	DUOX1
0.143	-0.114	LTB
0.143	-0.112	MIF4GD
0.142	-0.114	ANXA6
0.14	-0.113	GDF11
0.139	-0.114	ABHD14A
0.139	-0.112	OAZ1
0.139	-0.112	IGLC7
0.138	-0.108	ARHGEF26
0.138	-0.11	METTL8
0.137	-0.111	MBD1
0.137	-0.111	HLA-DMB
0.136	-0.111	OSBPL10-AS1
0.135	-0.107	C21orf62
0.134	-0.107	PPIAL4G
0.133	-0.11	C22orf34
0.133	-0.102	HARS2
0.132	-0.104	TSNAX
0.131	-0.104	GTF2H5
0.13	-0.108	MFF
0.13	-0.103	RBAK-RBAKDN
0.13	-0.103	IGLC6
0.129	-0.104	SMARCA2
0.129	-0.102	GPM6B
0.128	-0.104	SH3TC1
0.128	-0.104	TTC19
0.127	-0.102	ARPC4
0.126	-0.101	HLA-G
0.126	-0.0981	SIDT1-AS1
0.126	-0.104	NHLRC3
0.126	-0.1	SNRPB2
0.126	-0.102	TMEM150B
0.125	-0.1	DOCK6
0.124	-0.098	DRAXIN
0.124	-0.0983	RASGRP3
0.124	-0.102	TYW5
0.123	-0.0954	H2AFV
0.122	-0.0993	NELFCD
0.122	-0.0981	TACC1
0.121	-0.0946	BCL2L15
0.121	-0.0981	PDE6D
0.121	-0.0978	POLE2
0.12	-0.0963	CCZ1
0.12	-0.0974	LRRC75A
0.12	-0.0965	CYBA
0.12	-0.096	ACTR2
0.12	-0.0962	GJC1
0.118	-0.0928	IGLL1
0.118	-0.0945	VKORC1
0.118	-0.0946	TARBP2
0.118	-0.0918	OSBPL2
0.117	-0.0959	EIF4A2
0.117	-0.0946	SPON1
0.117	-0.0932	ORMDL1
0.115	-0.0901	FLCN
0.115	-0.0942	TMEM60
0.115	-0.0918	GIGYF2
0.115	-0.0903	PMF1
0.115	-0.0928	WDFY2
0.115	-0.091	TCP11L1
0.114	-0.0941	CD52
0.114	-0.091	MPP6
0.114	-0.0889	KLHL24
0.114	-0.0932	IGLL5
0.113	-0.0919	UBE2N
0.113	-0.0911	BLOC1S1
0.113	-0.0918	TRAF3IP3
0.113	-0.0914	TTC24
0.112	-0.0938	ATXN7
0.112	-0.0898	TMEM9
0.112	-0.0895	IGLC5
0.111	-0.0889	ZNF627
0.111	-0.0907	PITPNB
0.111	-0.0905	SRGAP1
0.111	-0.0876	AC023590.1
0.111	-0.0885	MRPL23
0.11	-0.0873	SOCS4
0.11	-0.0879	LINC00330
0.109	-0.0856	LUC7L3
0.108	-0.0858	ZNF556
0.108	-0.0881	PREP
0.108	-0.0838	LINC00685
0.108	-0.0838	KLF11
0.107	-0.0862	SLC25A39
0.107	-0.0859	RHOF
0.107	-0.088	GLIDR
0.107	-0.0832	HLA-DQB1
0.107	-0.085	ZNF292
0.106	-0.0861	CXCL14
0.106	-0.0839	SDCCAG8
0.106	-0.0852	ZNF302
0.106	-0.0828	EIF5AL1
0.106	-0.0877	ATP6V0E1
0.106	-0.0862	RDH5
0.105	-0.0818	C12orf54
0.105	-0.0862	SCAP
0.105	-0.0841	NCMAP
0.105	-0.0822	GREM1
0.104	-0.0822	ACSS1
0.104	-0.081	ABCF2
0.104	-0.0822	AKAP17A
0.104	-0.0842	ZEB2
0.104	-0.0818	APLP1
0.103	-0.0832	HBA2
0.102	-0.0818	OXCT1
0.102	-0.0793	SESTD1
0.102	-0.0821	OAZ2
0.102	-0.0809	ZBTB8B
0.101	-0.0801	SND1-IT1
0.0999	-0.0798	GAN
0.0997	-0.0787	MFSD1
0.0995	-0.0806	LINC01588
0.0995	-0.0795	GUCD1
0.0994	-0.0773	PLCE1
0.0992	-0.0823	CAST
0.0986	-0.0792	OCEL1
0.0982	-0.0807	UBL7
0.0981	-0.0809	PARL
0.0979	-0.0803	PDAP1
0.0978	-0.0774	FTO
0.0976	-0.0782	CYB561A3
0.0973	-0.0752	USP34
0.0972	-0.0795	ERLEC1
0.0969	-0.0769	STMN3
0.0962	-0.0771	DENND2A
0.0959	-0.0759	SAT2
0.0957	-0.0759	BCL10
0.0957	-0.0769	HBB
0.0955	-0.0782	FBXL2
0.0955	-0.0764	RSAD1
0.0955	-0.0787	SUGT1
0.0954	-0.0755	DBNL
0.0953	-0.0803	JCHAIN
0.0951	-0.0767	IMPDH1
0.0951	-0.0742	CCDC47
0.095	-0.0773	DEF8
0.0949	-0.0772	SIK2
0.0946	-0.0759	FCHSD1
0.0932	-0.0749	PPP6C
0.0932	-0.0727	TCOF1
0.0929	-0.0731	BTN3A3
0.0929	-0.0755	CMTM3
0.0929	-0.0705	INPP5K
0.0928	-0.0752	LMOD3
0.0924	-0.0739	PLEKHD1
0.0917	-0.0714	CC2D2A
0.0914	-0.0723	XPO1
0.0912	-0.0728	ARF3
0.0903	-0.074	FTX
0.0902	-0.0736	GMFG
0.0901	-0.0715	TRAPPC9
0.0898	-0.0743	SLTM
0.0898	-0.0751	POLDIP3
0.0897	-0.0714	MMS22L
0.0895	-0.0705	STAG1
0.0894	-0.0706	TMEM167B
0.0889	-0.0717	PSMD2
0.0888	-0.0714	GPR82
0.0886	-0.0714	NDUFC2
0.0884	-0.0711	CDIP1
0.0883	-0.0736	IWS1
0.0879	-0.0696	ALOX12-AS1
0.0878	-0.0692	AL592183.1
0.0873	-0.0731	M6PR
0.087	-0.0682	LETM2
0.0869	-0.0697	DRAM2
0.0854	-0.0684	TMED5
0.0853	-0.0706	THUMPD3-AS1
0.0852	-0.0686	TSPYL4
0.0852	-0.0701	MAP1LC3B2
0.085	-0.0663	KREMEN1
0.085	-0.0655	FAM208B
0.0846	-0.0698	CRTC1
0.0845	-0.0678	SSTR2
0.0844	-0.0671	LITAF
0.0842	-0.067	HEATR6
0.0842	-0.067	ASF1A
0.0839	-0.0684	CASK
0.0839	-0.0687	ARL2BP
0.0836	-0.0679	DHRS7B
0.0835	-0.0673	SUMO3
0.0834	-0.0682	PSME3
0.083	-0.0637	VAMP4
0.0825	-0.0617	ACE
0.0824	-0.0654	SNX3
0.0824	-0.066	COL27A1
0.0823	-0.0669	TBC1D9B
0.0823	-0.068	APOBEC3C
0.0823	-0.0652	CCDC66
0.0821	-0.0682	SGK494
0.0819	-0.0662	TCTA
0.0819	-0.0663	KCTD13
0.0818	-0.0644	FASTKD2
0.0816	-0.0644	GPR18
0.0815	-0.0641	TTPAL
0.0815	-0.0679	CYB561D2
0.0813	-0.0614	DDX39B
0.0813	-0.0618	NEU1
0.0811	-0.0678	UBE2E3
0.0806	-0.064	ZNF525
0.0806	-0.067	DIP2A
0.0804	-0.0676	ESCO1
0.0803	-0.0646	FAM41C
0.0803	-0.0625	SCAF4
0.0802	-0.065	YIPF4
0.0798	-0.0629	MPEG1
0.0797	-0.064	SMCR8
0.0795	-0.0635	DOPEY2
0.0794	-0.0656	FLI1
0.0794	-0.066	ANKRD52
0.0793	-0.0648	BSG
0.0788	-0.0603	TWF1
0.0788	-0.0658	CCL28
0.0785	-0.0629	LPIN2
0.0784	-0.0646	LINC00926
0.0784	-0.0601	SNN
0.0781	-0.0627	FAAP20
0.0779	-0.0629	TNIP1
0.0776	-0.0641	LRRC23
0.0775	-0.0646	PDSS2
0.0773	-0.0612	IL24
0.0767	-0.062	CPT1C
0.0767	-0.065	P4HB
0.0765	-0.0612	CXXC5
0.0765	-0.0631	LDOC1
0.0764	-0.0622	CYLD
0.0762	-0.0628	CUX1
0.0762	-0.0622	C5AR2
0.0759	-0.0601	LINC01481
0.0758	-0.0647	RASSF2
0.0758	-0.0665	AP2B1
0.0756	-0.061	MYO9B
0.0756	-0.0633	TGS1
0.0753	-0.0625	IGKV2-29
0.0753	-0.062	ZCCHC7
0.0751	-0.0596	LAMP1
0.0751	-0.0591	SNHG15
0.075	-0.059	PUF60
0.0749	-0.0636	EMSY
0.0749	-0.0599	NELFE
0.0747	-0.0609	ARL5B
0.0745	-0.0621	ILF2
0.0745	-0.0596	SPCS2
0.0743	-0.0593	WASF2
0.0743	-0.0578	PABPC3
0.0742	-0.0591	FNDC3A
0.0741	-0.0613	CAT
0.0741	-0.061	DVL2
0.074	-0.0573	GNPTAB
0.074	-0.0571	FGFR1OP2
0.0738	-0.0572	SULF2
0.0738	-0.0586	FKBP4
0.0738	-0.0565	COG8
0.0738	-0.0609	S1PR4
0.0734	-0.0633	CYP2R1
0.0732	-0.0568	XRCC1
0.073	-0.0574	MKNK2
0.0728	-0.0617	IL1RAP
0.0728	-0.0577	NUAK2
0.0726	-0.0604	COPB2
0.0723	-0.0579	RGS19
0.0723	-0.057	YBX1
0.0723	-0.0577	ELP4
0.0719	-0.0598	ATG10
0.0719	-0.0549	POMZP3
0.0719	-0.0583	POLR2J2
0.0718	-0.0588	CDK11B
0.0716	-0.0558	GLB1L2
0.0715	-0.0588	TIPRL
0.0714	-0.0577	IKBIP
0.0712	-0.057	ORAI1
0.0712	-0.0606	ERGIC3
0.0711	-0.0585	RGS7
0.0707	-0.0596	SMAP1
0.0707	-0.0571	DPM1
0.0702	-0.059	PSPH
0.0702	-0.0568	SYTL4
0.0699	-0.0537	SENP2
0.0698	-0.0577	TP53I11
0.0695	-0.058	FAM174A
0.0693	-0.0555	AMD1
0.0693	-0.0577	HDLBP
0.0692	-0.0564	NR1D2
0.0687	-0.0575	SFPQ
0.0678	-0.054	SPAST
0.0677	-0.057	NSMCE3
0.0673	-0.0531	ACTR1B
0.0666	-0.0531	LIMD2
0.0666	-0.0533	ANXA5
0.0665	-0.0504	TAPBPL
0.0664	-0.0518	NICN1
0.066	-0.0515	TFDP2
0.0658	-0.0518	ELAVL1
0.0655	-0.0519	OSBPL8
0.0654	-0.0542	ICA1L
0.0651	-0.0548	EFCAB14
0.0649	-0.0526	MRVI1-AS1
0.0648	-0.0552	STK19
0.0647	-0.0543	NIPA2
0.0646	-0.0508	LAT2
0.0645	-0.0496	PECAM1
0.0644	-0.0508	SLC9B2
0.0644	-0.0513	RRBP1
0.0644	-0.0509	TMEM179B
0.0643	-0.0514	BCAP31
0.0642	-0.0523	FAM120B
0.0642	-0.0493	CNKSR2
0.0641	-0.0529	SLC35E3
0.0639	-0.0526	LEAP2
0.0638	-0.0494	KIF5B
0.0638	-0.0509	STARD3
0.0636	-0.0528	BCL2L13
0.0633	-0.0491	IGFBP4
0.0633	-0.0488	COQ10B
0.0633	-0.051	SERPINB9
0.0632	-0.0526	PET117
0.0632	-0.0527	HLA-DOA
0.0627	-0.0512	THEMIS2
0.0624	-0.0494	NFKBIB
0.0623	-0.0488	MPDU1
0.0623	-0.0466	FAM210A
0.0623	-0.0526	CCND2
0.0622	-0.0499	RAB3GAP2
0.0621	-0.0527	SKAP2
0.0619	-0.0536	BOP1
0.0616	-0.0471	SP2
0.0616	-0.0529	COX7C
0.0615	-0.0506	USP1
0.0614	-0.0497	GALNT2
0.0613	-0.047	ANKRD37
0.0612	-0.0472	ACLY
0.0612	-0.0483	GOLGA5
0.0611	-0.0498	UBR5
0.0611	-0.0516	SEC61A1
0.0611	-0.0518	PRPF6
0.061	-0.0482	CYP3A5
0.0609	-0.0484	XBP1
0.0606	-0.0513	ARID3A
0.0605	-0.0483	TRIM8
0.0603	-0.0471	ERGIC1
0.0603	-0.0515	ATL3
0.06	-0.049	CR1
0.0599	-0.0496	LEF1
0.0598	-0.0484	EIF2AK2
0.0598	-0.0558	CS
0.0598	-0.0504	RAP2B
0.0598	-0.0454	TTC13
0.0595	-0.0497	PAF1
0.0592	-0.0461	LINC01473
0.0588	-0.0504	HDAC7
0.0587	-0.0501	SYNCRIP
0.0585	-0.0498	SLC4A7
0.0585	-0.0471	AC005480.1
0.0585	-0.0449	FCHSD2
0.0584	-0.0459	EIF4G2
0.0584	-0.0444	CMPK1
0.0582	-0.0464	CWF19L2
0.0582	-0.0488	FAM177A1
0.0581	-0.0436	PBXIP1
0.0581	-0.0481	ERO1B
0.0581	-0.0473	TM9SF1
0.0581	-0.0486	OPN3
0.058	-0.0452	OLA1
0.058	-0.0472	RABAC1
0.0578	-0.0435	KLHL9
0.0575	-0.0488	KAT7
0.0574	-0.0465	NRL
0.0573	-0.0457	CD38
0.0571	-0.0461	PDCD11
0.0571	-0.0459	NPM1
0.0569	-0.0449	CBR4
0.056	-0.0456	NDUFA6
0.0559	-0.0459	MAP4K2
0.0558	-0.0444	HDAC9
0.0558	-0.0464	SIGIRR
0.0554	-0.0441	CCDC138
0.0553	-0.0401	C20orf27
0.0553	-0.0429	FAM96B
0.0552	-0.0455	TGFB1
0.0551	-0.0428	TCTN3
0.0551	-0.0427	SAMD8
0.0549	-0.048	HBA1
0.0549	-0.0432	EIF4A1
0.0548	-0.0457	NDUFB9
0.0545	-0.0452	RABEP1
0.0545	-0.044	PARP16
0.0544	-0.048	ADAM19
0.0544	-0.0418	OSGEP
0.0541	-0.0426	ABHD1
0.0538	-0.0443	HERC2
0.0536	-0.0417	AKT2
0.0536	-0.0401	DCTN2
0.0535	-0.0417	SYNC
0.0535	-0.044	EIF3I
0.0534	-0.0458	PPRC1
0.0533	-0.0405	RRM1
0.0533	-0.0458	LMF1
0.0532	-0.0427	PARVB
0.0531	-0.0427	OS9
0.053	-0.0448	CD53
0.0529	-0.0449	ZNF428
0.0525	-0.0404	NDUFAF2
0.0524	-0.0411	PMPCB
0.0524	-0.0438	MYL12A
0.0522	-0.0458	LRRC14
0.0522	-0.0397	TP53
0.0522	-0.0402	ANKRD13C
0.0521	-0.0412	HIST1H3A
0.052	-0.0436	RTN3
0.052	-0.0392	GHRL
0.0519	-0.0407	DBNDD1
0.0519	-0.0408	DEGS1
0.0519	-0.0425	DRC3
0.0518	-0.0401	NOP10
0.0517	-0.042	DCLK2
0.0517	-0.0443	FXYD7
0.0516	-0.0413	CHRAC1
0.0516	-0.0419	GRK5
0.0514	-0.0404	COQ4
0.0513	-0.0434	RNF130
0.0512	-0.0387	CHTF8
0.0511	-0.0411	SRCAP
0.0509	-0.0457	VPS26A
0.0509	-0.0388	FEM1B
0.0509	-0.0404	KIDINS220
0.0509	-0.0402	BEX4
0.0509	-0.0385	RNF126
0.0507	-0.0373	ITGB2
0.0507	-0.0402	FUS
0.0505	-0.0381	ADK
0.0505	-0.0421	TRAPPC6A
0.0504	-0.0394	ZDBF2
0.0504	-0.0397	RNF5
0.0504	-0.0422	SURF4
0.0502	-0.0399	RAB3GAP1
0.0502	-0.0409	CLCN7
0.05	-0.0412	RNF187
0.0499	-0.044	FCRLA
0.0495	-0.038	ITCH
0.0495	-0.0398	TIMM50
0.0494	-0.0395	GNG7
0.0492	-0.0421	VDAC2
0.049	-0.0388	LMNTD1
0.0487	-0.0399	HMGCL
0.0486	-0.0376	EIF3A
0.0485	-0.0391	SLF1
0.0485	-0.0395	IGHV3-66
0.0481	-0.0406	STK26
0.048	-0.0394	E2F5
0.048	-0.0376	PINX1
0.048	-0.042	TSGA10
0.0477	-0.039	BPTF
0.0475	-0.0366	THOP1
0.0473	-0.0376	IMPDH2
0.0473	-0.0389	SLU7
0.0472	-0.0396	KDM2A
0.0471	-0.039	PRR4
0.0471	-0.0382	IRF4
0.0469	-0.036	GOLGA1
0.0468	-0.0339	ARMC10
0.0468	-0.0402	TINF2
0.0467	-0.0376	TBCB
0.0466	-0.0339	INO80
0.0462	-0.0393	KPNA5
0.0462	-0.0388	BRD8
0.0461	-0.0371	EIF3F
0.046	-0.0382	SPATA2L
0.046	-0.0369	TDP1
0.0456	-0.0372	IRF9
0.0456	-0.0399	HLA-C
0.0456	-0.0356	AP5Z1
0.0455	-0.0374	TRAF4
0.0454	-0.0359	PRMT9
0.0453	-0.0378	PRMT3
0.0452	-0.0321	NUP98
0.0452	-0.0344	GNAI2
0.0451	-0.0369	CDK5RAP3
0.0451	-0.0354	BNIP3L
0.0448	-0.0357	SF3A3
0.0447	-0.0379	TRAP1
0.0447	-0.0355	PEX11B
0.0446	-0.0382	B3GNT2
0.0444	-0.0344	EHMT2
0.0443	-0.0324	EPB42
0.0441	-0.0369	SLC10A3
0.044	-0.0376	MAGED2
0.0438	-0.0358	DENND4A
0.0438	-0.036	NDEL1
0.0437	-0.0371	PDPK1
0.0437	-0.0342	ZNF664
0.0436	-0.0375	GOSR1
0.0436	-0.0361	TES
0.0435	-0.033	RFX5
0.0433	-0.0357	KCNQ1OT1
0.0433	-0.0363	RAPGEF6
0.0433	-0.0362	AKAP8L
0.0433	-0.0362	FAM135A
0.0432	-0.0326	MAN2B2
0.0429	-0.0336	FAM76B
0.0428	-0.0357	ZNF76
0.0427	-0.0302	RNGTT
0.0427	-0.0349	TTC31
0.0425	-0.0368	MYD88
0.0425	-0.0321	PRR13
0.0425	-0.0324	PDZD8
0.0424	-0.0351	R3HCC1L
0.0423	-0.032	USP4
0.0422	-0.0352	WDR86
0.0422	-0.0345	ZNF256
0.0422	-0.0329	ZNF227
0.0422	-0.0307	KDM3A
0.0421	-0.037	RAB6A
0.0421	-0.034	KIAA0232
0.0417	-0.0325	FRAT1
0.0417	-0.0322	POM121C
0.0416	-0.0354	AAMP
0.0415	-0.0321	EVI5
0.0415	-0.0335	STX16
0.0414	-0.0379	ARSA
0.0413	-0.0348	PMM2
0.0412	-0.0336	EML3
0.0411	-0.0318	IPO7
0.0411	-0.0282	CWC25
0.041	-0.0312	SERPINB1
0.0408	-0.0317	SEC24C
0.0407	-0.0327	QTRT1
0.0407	-0.0353	SUN1
0.0405	-0.0323	UBXN2A
0.0404	-0.0311	CEP192
0.0403	-0.031	MEF2C-AS1
0.0402	-0.0362	PUM3
0.0402	-0.0321	DNAJC13
0.0402	-0.0338	KANSL2
0.0402	-0.0317	COMMD6
0.0401	-0.0323	PAOX
0.04	-0.0322	TRANK1
0.04	-0.0325	SUPT20H
0.0399	-0.0363	PHKG2
0.0399	-0.0303	SNRPB
0.0398	-0.0316	THAP2
0.0398	-0.0329	GLRX
0.0398	-0.0332	AGPAT4
0.0397	-0.0313	FCGR2B
0.0396	-0.0305	PPP2R5E
0.0394	-0.0331	ACSL3
0.0394	-0.0299	RBM15B
0.0394	-0.0321	HLA-B
0.039	-0.0309	DNAJA3
0.0389	-0.0325	KIAA0040
0.0389	-0.0308	CERS4
0.0388	-0.03	FAM3A
0.0388	-0.0313	ACBD5
0.0386	-0.0313	DEDD
0.0386	-0.0296	TRIM22
0.0385	-0.0323	C16orf87
0.0382	-0.0314	SNRPE
0.0382	-0.032	VPS4A
0.0381	-0.0298	BRAP
0.038	-0.0287	XRCC5
0.0377	-0.03	IGFLR1
0.0376	-0.0303	CEP290
0.0376	-0.0342	MICB
0.0374	-0.0283	HERC1
0.0374	-0.0288	CASP9
0.0373	-0.0293	PIM1
0.0373	-0.0324	NOMO2
0.0373	-0.029	TOR1AIP1
0.0373	-0.0304	SSBP4
0.0372	-0.0303	GRINA
0.0371	-0.0308	C8orf88
0.037	-0.0309	CAND1
0.0368	-0.0312	CUEDC2
0.0367	-0.0291	TBCK
0.0366	-0.0324	MDFIC
0.0366	-0.0306	CNOT4
0.0364	-0.0287	DNAJB4
0.0363	-0.032	BTAF1
0.0363	-0.029	SLC25A16
0.0363	-0.0312	UBE2L6
0.0362	-0.0305	ZBTB5
0.0361	-0.0301	CUL4A
0.0361	-0.0264	RALA
0.0361	-0.0289	EMC3
0.0358	-0.0277	ATP5S
0.0356	-0.0283	XRN1
0.0356	-0.0283	KLC2
0.0356	-0.0254	CFL2
0.0355	-0.029	CRACR2A
0.0354	-0.0275	CLTB
0.0352	-0.0258	PGK1
0.0351	-0.0274	CCDC59
0.0351	-0.0288	LIMS2
0.035	-0.032	ATG5
0.0344	-0.026	PCGF5
0.0343	-0.0246	LBR
0.0342	-0.027	HNRNPR
0.0341	-0.0257	MX1
0.0341	-0.027	IRF2
0.0341	-0.0266	PPP1R10
0.0341	-0.0281	SNX8
0.034	-0.0271	SRSF4
0.0339	-0.0256	ZFP64
0.0337	-0.0243	PPP1R11
0.0335	-0.0282	ZMAT1
0.0333	-0.0254	SACS
0.0332	-0.028	IPO8
0.0332	-0.0281	ZNF708
0.0331	-0.0278	DERL2
0.0331	-0.0253	PABPC4
0.0329	-0.0268	LINC01355
0.0329	-0.027	TLN1
0.0327	-0.0271	DTX2
0.0327	-0.0265	FBXW5
0.0326	-0.022	RNF169
0.0326	-0.0257	SMARCAD1
0.0325	-0.0262	SUMF1
0.0324	-0.0253	YWHAE
0.0322	-0.0253	GSE1
0.0319	-0.0253	HM13
0.0319	-0.0242	ELF4
0.0318	-0.0271	SND1
0.0318	-0.0278	MPRIP
0.0317	-0.0252	PDIA4
0.0316	-0.0265	ANTXR2
0.0316	-0.0247	COMT
0.0315	-0.0216	HEATR1
0.0315	-0.0254	CHKA
0.0315	-0.0265	C14orf119
0.0312	-0.0238	NOD1
0.0312	-0.0246	CREM
0.0312	-0.0226	PFN1
0.0311	-0.0266	PNPLA8
0.031	-0.0245	NEK7
0.0309	-0.0245	NAPSA
0.0308	-0.0229	PPP1R2
0.0307	-0.0234	RBBP8
0.0306	-0.0272	STAG2
0.0304	-0.0243	HMGB2
0.0304	-0.0241	CNOT2
0.0304	-0.0237	EMILIN2
0.0304	-0.0257	NUDCD3
0.0302	-0.0251	TBC1D1
0.0301	-0.0257	MLEC
0.03	-0.0248	NRM
0.03	-0.0204	THUMPD2
0.03	-0.0215	PSMC6
0.03	-0.0231	DOCK8
0.0299	-0.0252	HCG18
0.0297	-0.0249	PRKACB
0.0297	-0.027	IFNG-AS1
0.0297	-0.0238	DPH3
0.0297	-0.0215	INAFM1
0.0296	-0.0253	MED24
0.0295	-0.0246	DDB1
0.0294	-0.025	TLCD2
0.0294	-0.024	ESD
0.0293	-0.0243	R3HDM4
0.0292	-0.0255	FCER2
0.0291	-0.0255	CISD2
0.0291	-0.025	IKBKG
0.0291	-0.0236	ATAD1
0.029	-0.024	UFM1
0.0288	-0.0226	USP48
0.0287	-0.0211	CREBBP
0.0286	-0.0258	TMLHE
0.0285	-0.0265	HMGN3
0.0284	-0.0242	ZBP1
0.0283	-0.0216	ZC3H12A
0.0283	-0.0238	CPNE3
0.0282	-0.0215	TMEM175
0.0281	-0.0225	ARL6IP1
0.0281	-0.025	FGR
0.0281	-0.0244	SYNRG
0.0279	-0.0246	KTI12
0.0278	-0.0226	GPATCH11
0.0278	-0.0202	EIF2B3
0.0278	-0.0211	AK2
0.0277	-0.0202	PPIL4
0.0277	-0.0223	TMEM120A
0.0276	-0.0224	CRY2
0.0275	-0.0211	UBQLN1
0.0274	-0.0219	CTCF
0.0273	-0.0251	H3F3A
0.0272	-0.0238	U2AF2
0.0272	-0.0214	TPCN1
0.0272	-0.0207	RSF1
0.0271	-0.0214	IGLV2-5
0.0269	-0.0204	OSTM1
0.0268	-0.0203	VPS41
0.0268	-0.0236	AGL
0.0267	-0.0248	ARHGAP24
0.0267	-0.0188	ZRANB2
0.0266	-0.0244	EFTUD2
0.0265	-0.0197	ZNF667-AS1
0.0265	-0.017	OSBPL9
0.0264	-0.0195	FIS1
0.0264	-0.0223	SDHAF2
0.0262	-0.0184	ACSL5
0.0262	-0.0221	KCNJ3
0.0261	-0.0213	TMF1
0.0259	-0.0194	PHF7
0.0259	-0.0197	ZMYND8
0.0257	-0.0214	TACC3
0.0256	-0.0223	MSL2
0.0256	-0.0229	ZNF106
0.0256	-0.0192	PHACTR1
0.0256	-0.0214	PPP1CC
0.0256	-0.018	PIGG
0.0256	-0.0219	PCMTD1
0.0255	-0.0232	ZNF654
0.0254	-0.0206	RAD51B
0.0253	-0.0175	ZNF384
0.0253	-0.0224	RNF41
0.0253	-0.0214	CMTR1
0.0251	-0.0176	LIN54
0.0251	-0.0225	DHX8
0.025	-0.0187	TROVE2
0.025	-0.0165	ABCA7
0.025	-0.0184	YRDC
0.0248	-0.0191	ETFDH
0.0247	-0.0195	SPTLC1
0.0247	-0.0183	AAGAB
0.0247	-0.0192	KLF3
0.0246	-0.0208	LARP4
0.0246	-0.018	VASP
0.0244	-0.0213	ATG4D
0.0243	-0.014	ACO2
0.0242	-0.0224	TUBB3
0.0241	-0.0206	GTF2H2
0.024	-0.0166	C12orf42
0.024	-0.0186	GMDS
0.0239	-0.0183	CPSF6
0.0239	-0.0179	MOSPD3
0.0239	-0.02	HLA-A
0.0238	-0.021	MAP7D1
0.0237	-0.0212	SARS2
0.0236	-0.0156	ARID5B
0.0236	-0.0209	SNRK
0.0236	-0.0209	DHRSX
0.0235	-0.0205	ARL8B
0.0232	-0.0206	RANBP10
0.0231	-0.018	THOC2
0.0229	-0.0186	AKAP8
0.0227	-0.0178	NR2C2
0.0226	-0.018	OSBP
0.0225	-0.0133	PPTC7
0.0225	-0.0208	DDX27
0.0223	-0.0166	SUPT3H
0.0223	-0.0184	ATG7
0.0222	-0.0181	IQSEC1
0.0221	-0.0161	RRAGB
0.022	-0.0195	TMEM259
0.022	-0.0161	MATN1-AS1
0.022	-0.0173	WDR34
0.0219	-0.0165	INSIG1
0.0219	-0.0177	TRAFD1
0.0218	-0.0175	CD79A
0.0217	-0.0189	ALKBH6
0.0217	-0.0196	ELL3
0.0216	-0.0164	RB1CC1
0.0216	-0.0197	JOSD1
0.0215	-0.0179	CNFN
0.0214	-0.0175	CSNK1D
0.0213	-0.0168	CD47
0.0212	-0.0176	TMOD3
0.0211	-0.0199	MAT2A
0.0211	-0.0148	SLX1B
0.021	-0.0198	WDR13
0.021	-0.017	TIMELESS
0.0209	-0.0165	CMC2
0.0209	-0.0181	FNBP1
0.0209	-0.0181	LAPTM5
0.0209	-0.0194	NAT10
0.0208	-0.0164	VTA1
0.0208	-0.0186	USB1
0.0208	-0.0174	CNBP
0.0207	-0.0187	XRN2
0.0206	-0.019	RNF10
0.0205	-0.013	TTC7A
0.0205	-0.0179	TTF2
0.0204	-0.0134	TIMM17B
0.0204	-0.0176	TMEM109
0.0203	-0.0174	BAG5
0.0203	-0.0172	ABCB7
0.0203	-0.0168	ASB1
0.0202	-0.015	WDR4
0.0202	-0.0177	EIF3G
0.0202	-0.0179	DYNC1LI1
0.0201	-0.0149	TMEM243
0.0201	-0.0146	RAD23B
0.0201	-0.0135	CDK13
0.0199	-0.0147	HPS6
0.0198	-0.0188	RECQL
0.0197	-0.0177	OSBPL7
0.0196	-0.0181	TP53INP2
0.0196	-0.0134	ATAD2B
0.0194	-0.0142	FPGS
0.0194	-0.0153	DIAPH1
0.0194	-0.0149	SURF1
0.0192	-0.0144	POC1B-GALNT4
0.0191	-0.0157	PSMA7
0.0191	-0.0155	CA5A
0.0191	-0.0143	BCKDHB
0.019	-0.0186	NFATC1
0.019	-0.0147	SPPL2B
0.019	-0.018	F8A3
0.0188	-0.0131	OSER1
0.0188	-0.0162	ZNF100
0.0188	-0.016	SPATA20
0.0187	-0.0171	ATF7IP2
0.0186	-0.0162	ZNF836
0.0186	-0.0142	DPEP2
0.0185	-0.0149	KIAA1468
0.0185	-0.017	CHD3
0.0184	-0.0176	CNOT6L
0.0183	-0.0168	HIVEP1
0.0183	-0.0165	SBF1
0.0183	-0.0142	PEX3
0.0183	-0.0143	SNX13
0.0182	-0.0136	DPM3
0.018	-0.0111	CCDC130
0.018	-0.0161	JUP
0.0179	-0.0132	MLLT10
0.0177	-0.0152	NFKB2
0.0177	-0.0127	PDE8A
0.0177	-0.0131	NOL9
0.0177	-0.0128	IGHV3-21
0.0177	-0.0132	CEP63
0.0177	-0.0127	EMP3
0.0175	-0.0146	PRNP
0.0174	-0.0136	CHL1
0.0174	-0.0173	TMUB2
0.0174	-0.0111	PAM16
0.017	-0.0152	SPOPL
0.0169	-0.0126	LCORL
0.0168	-0.0127	ZNF880
0.0168	-0.0129	NDUFA3
0.0168	-0.0117	DMTF1
0.0168	-0.013	FAM173A
0.0168	-0.0148	RASA1
0.0167	-0.0147	YPEL2
0.0166	-0.0189	CCDC191
0.0166	-0.0159	PNO1
0.0164	-0.00812	CCDC141
0.0162	-0.0125	ST3GAL3
0.0161	-0.0135	CTBS
0.016	-0.0114	ANKRD44
0.016	-0.01	ZNF320
0.0159	-0.0129	SH3KBP1
0.0159	-0.015	TET2
0.0158	-0.0123	BLOC1S6
0.0158	-0.0181	ZNF718
0.0158	-0.0134	UHRF1BP1
0.0157	-0.0155	IGHV3-43
0.0156	-0.0124	CDK12
0.0156	-0.0141	UBE4A
0.0156	-0.014	NFIC
0.0155	-0.0131	PPP2R5B
0.0154	-0.0155	COG1
0.0153	-0.0111	PI4K2B
0.0152	-0.00959	TUBGCP6
0.0151	-0.0139	COPG2
0.0151	-0.0122	PPP5C
0.015	-0.0111	FBXO33
0.015	-0.012	USP39
0.0149	-0.012	ATP11B
0.0149	-0.0141	STAP1
0.0148	-0.013	PRELID3B
0.0148	-0.0116	FAM222B
0.0148	-0.0104	ITSN2
0.0148	-0.0096	MAP4
0.0148	-0.0142	UFC1
0.0148	-0.0123	SGMS1
0.0148	-0.0148	SETD7
0.0147	-0.0115	MFSD5
0.0146	-0.0127	MPI
0.0145	-0.0131	PTK2
0.0145	-0.00851	CALM3
0.0145	-0.0145	CLASP1
0.0145	-0.0124	MMAB
0.0144	-0.0145	CFL1
0.0144	-0.00908	RABL6
0.0144	-0.00994	JAM3
0.0143	-0.0109	ANKRD27
0.0143	-0.0107	DAXX
0.0143	-0.0103	DENR
0.0143	-0.0118	TIAL1
0.0143	-0.0108	PNRC2
0.0142	-0.0103	MARK2
0.0141	-0.0134	IGHGP
0.014	-0.0104	PHF20
0.014	-0.0127	ZDHHC24
0.014	-0.00933	TMBIM1
0.0139	-0.01	TOMM20
0.0139	-0.0123	MRPS18A
0.0139	-0.0107	SGK3
0.0139	-0.0123	NOL12
0.0137	-0.0108	PI4K2A
0.0137	-0.0107	FAM43A
0.0137	-0.0123	WDR92
0.0137	-0.0104	CCDC69
0.0137	-0.0157	URM1
0.0137	-0.0124	MMP17
0.0137	-0.0143	CSDE1
0.0136	-0.011	SH3GL1
0.0135	-0.00759	NT5C
0.0135	-0.0144	PFDN1
0.0134	-0.00998	AGTPBP1
0.0134	-0.0103	RNF38
0.0132	-0.0109	UQCRFS1
0.0131	-0.0124	KIAA0100
0.0131	-0.01	ILF3
0.013	-0.00864	DCTD
0.0129	-0.0102	PLD3
0.0127	-0.00914	AATF
0.0127	-0.0108	GPS2
0.0126	-0.0101	CBLL1
0.0126	-0.0118	ZBTB39
0.0125	-0.0108	UBA5
0.0125	-0.00899	DNASE1L1
0.0125	-0.0117	GNAS
0.0124	-0.00963	IKZF3
0.0123	-0.00888	FLII
0.0122	-0.00823	HSPA4L
0.0121	-0.00839	CCDC24
0.012	-0.00823	CHD2
0.012	-0.0106	NCKAP1L
0.012	-0.00978	NEDD9
0.0119	-0.0128	UCHL5
0.0119	-0.0106	SAP30BP
0.0119	-0.00681	ATXN10
0.0118	-0.0113	POGZ
0.0118	-0.0124	TRPT1
0.0118	-0.00733	RNF135
0.0117	-0.011	MRPS21
0.0117	-0.0102	COPS5
0.0115	-0.0118	NFE2L2
0.0115	-0.0104	EXOC8
0.0114	-0.00983	CHERP
0.0113	-0.00687	KDM2B
0.0113	-0.00917	IGHV1-3
0.0112	-0.0106	PLD4
0.0111	-0.00747	YBX3
0.0111	-0.00812	MBTPS1
0.0109	-0.00754	COL4A3BP
0.0109	-0.0121	ZNF575
0.0108	-0.0101	PRPS1
0.0108	-0.0105	ZNF511
0.0106	-0.012	APAF1
0.0105	-0.00828	SPI1
0.0105	-0.01	FAM206A
0.0102	-0.0087	ZHX1
0.0102	-0.0108	SKAP1
0.0102	-0.00622	PRR7
0.0101	-0.00712	ZDHHC3
0.00996	-0.0085	SPIDR
0.00994	-0.00855	NDUFC1
0.00992	-0.00978	AP3M1
0.0099	-0.00951	FGD3
0.0099	-0.00925	DENND1B
0.00987	-0.0101	MDP1
0.00985	-0.00771	USP10
0.00979	-0.00784	CCDC84
0.00974	-0.00834	PDF
0.00969	-0.0064	REEP3
0.00969	-0.00938	PACSIN2
0.00968	-0.00986	CCNH
0.00957	-0.00916	TIGAR
0.00956	-0.00666	INTS9
0.00955	-0.00813	AP1AR
0.00947	-0.0105	UBAP2L
0.00943	-0.00968	PRKRIP1
0.00939	-0.009	DDX59
0.00938	-0.00824	ABTB1
0.0093	-0.00855	UBAC2
0.00926	-0.00609	EVI2A
0.00925	-0.00885	NDE1
0.00921	-0.0086	SENP7
0.0092	-0.00775	ABCG1
0.00918	-0.00714	PKN1
0.00917	-0.00668	SPAG9
0.00914	-0.00757	DDX54
0.00909	-0.00751	KDM7A
0.009	-0.0091	KRI1
0.00895	-0.0072	GAPDH
0.00883	-0.00653	EFCAB13
0.00866	-0.00594	TIPARP
0.00844	-0.011	TIA1
0.00843	-0.00676	CLDND1
0.00833	-0.0104	RNF40
0.0083	-0.00975	CAPRIN1
0.00828	-0.00481	HIST4H4
0.00819	-0.0062	SOD2
0.00817	-0.00687	NPEPPS
0.00803	-0.00606	C6orf106
0.00802	-0.00927	OXA1L
0.00801	-0.00622	LTN1
0.00795	-0.00553	PLEKHJ1
0.00789	-0.00396	RABGEF1
0.00781	-0.00697	C8orf33
0.0076	-0.00492	NRBP1
0.00747	-0.00786	OTUD1
0.00727	-0.00731	EPRS
0.00722	-0.00861	MID1IP1
0.00721	-0.00699	LRRK2
0.00715	-0.00599	C7orf50
0.00709	-0.00624	UCP2
0.00703	-0.00698	IFT80
0.00691	-0.00812	CREBRF
0.00685	-0.008	CR2
0.00683	-0.00636	ZNF236
0.00681	-0.0038	SERINC3
0.00674	-0.00122	ENSA
0.00672	-0.00311	HLA-F
0.00669	-0.00716	CHCHD3
0.00663	-0.00584	SLC44A2
0.00656	-0.00557	CCDC93
0.00648	-0.00627	TRIO
0.00645	-0.00893	DPP7
0.00645	-0.00374	BTBD1
0.00645	-0.00509	PARP10
0.00641	-0.00178	TMEM165
0.00631	-0.00693	JMJD4
0.00618	-0.00508	WNT10A
0.00617	-0.00396	ATF2
0.00617	-0.00754	CDK6
0.00617	-0.00813	FERMT3
0.00613	-0.00543	PSMD5
0.00612	-0.00688	FBXL12
0.00606	-0.00573	SLC25A53
0.00603	-0.00359	TAX1BP1
0.00597	-0.00312	RBKS
0.00596	-0.00518	UNC119
0.00594	-0.00649	COASY
0.00572	-0.00204	TGOLN2
0.0057	-0.000915	BRI3
0.0057	-0.00378	RNF114
0.00569	-0.00794	YWHAB
0.00568	-0.00638	PEX10
0.00566	-0.00443	H2AFJ
0.00565	-0.00667	C1orf43
0.00563	-0.00767	ATG4B
0.00558	-0.00388	GTF2E2
0.00558	-0.00699	AEBP1
0.00552	-0.00681	FAM53C
0.00549	-0.00616	SRFBP1
0.00548	-0.00653	TUBB2A
0.00543	-0.00224	STAT6
0.0054	-0.00511	SNX17
0.00519	-0.00413	PML
0.00514	-0.00557	DNPEP
0.00498	-0.00794	MMGT1
0.00484	-0.00544	KMT2A
0.00476	-0.00277	PGAM1
0.00474	-0.00149	PIGQ
0.00472	-0.00425	LENG8
0.00468	-0.00316	NSUN2
0.00458	-0.000494	G3BP1
0.00446	-0.00419	PTPN2
0.00438	-0.00277	SMYD3
0.00434	-0.00301	ZEB1
0.00433	-0.00635	VPS18
0.00413	-0.00492	FAM227A
0.0041	-0.00369	DNAJC3
0.00399	-0.0032	SLC36A4
0.00393	-0.00534	NDOR1
0.00387	-0.00567	UBA2
0.00386	-0.000605	GSPT1
0.00386	-0.00394	FUOM
0.00379	-0.00205	ILKAP
0.00376	-0.00346	RBMX
0.00371	-0.00511	FDFT1
0.00371	-0.00291	MAN1A2
0.00359	-0.00682	TFB1M
0.0035	-0.00187	RARA
0.00348	-0.0037	CELF2
0.00346	-0.00565	TAF1D
0.00345	-0.00274	TRIM4
0.00344	-0.00512	HSPA4
0.00325	-0.00173	CAMK1D
0.0032	-0.00172	POLR1A
0.00316	0.00189	HIBADH
0.00314	-0.00446	MGMT
0.00296	-3.78e-05	RNPEPL1
0.00291	-0.00321	CLCN3
0.0029	-0.00407	SNHG7
0.00288	-0.00252	CCNT2
0.00285	-0.00322	ANKRD10
0.00282	-0.00486	BRCA2
0.00282	-0.00382	ABHD13
0.00281	-0.00188	RABGAP1L
0.00276	-0.00052	ARAF
0.00275	-0.00169	SLC9A3
0.00273	-0.00242	VRK2
0.00262	-0.00308	ISG20L2
0.00254	-0.00167	GEM
0.00251	-0.000819	FLOT2
0.00247	-0.00261	ZNF628
0.00244	-0.00436	SYT5
0.00216	-0.00304	SLC25A43
0.00214	0.00171	WASF1
0.00208	0.000106	MRPL28
0.00206	-0.00145	KPNB1
0.00194	0.000546	MOXD1
0.00191	-0.00211	C11orf80
0.00185	-0.00351	NAPG
0.00183	-0.00106	TBC1D13
0.0018	0.000765	ZNF142
0.00178	-0.00193	PHYKPL
0.0016	-0.00372	EP300
0.00158	-0.00104	TNFRSF10A
0.00157	-0.000136	TTC9C
0.00143	-0.000215	CXorf57
0.00141	-0.0031	APBB1
0.00131	-0.00193	ACP1
0.00121	-0.00396	KIFAP3
0.00119	-0.000104	FLOT1
0.00118	-9.66e-05	C4orf48
0.00117	-0.000684	MRPL4
0.00116	-0.00337	VCAN
0.00104	-0.00165	RNF11
0.00103	-0.000341	BICD1
0.00102	-0.000192	EIF3L
0.000994	-0.0025	ALG1
0.000974	-0.00187	TMPO
0.000942	-0.00156	CDC5L
0.000923	0.000152	XPO4
0.000894	-0.00215	NOLC1
0.000869	-0.000535	PDCD4-AS1
0.000819	0.00163	PRPF19
0.000641	-0.00434	YTHDF2
0.00057	-0.00332	SSRP1
0.000544	-0.00017	BCL9L
0.000437	-0.00572	NOB1
0.000368	-0.000463	PGS1
0.000359	-3.49e-05	TMEM50A
0.000333	-0.00214	PTAR1
0.000104	-4.15e-05	PREPL
-2.62e-05	0.00112	RABEP2
-0.000218	0.000375	SCRN2
-0.000276	-0.000592	TNIP2
-0.000295	0.000238	C11orf54
-0.000296	3.82e-05	PIK3R5
-0.000313	0.000207	USP53
-0.000364	0.00154	CD46
-0.000368	-0.000255	FRYL
-0.000474	0.00132	EBPL
-0.000486	-0.000913	PPFIBP1
-0.000537	-0.000364	THOC3
-0.000571	-0.000663	EXOC4
-0.000582	-0.00098	EIF3J
-0.000598	0.000855	ADIPOR2
-0.000715	0.00191	IRF2BP2
-0.000759	0.00202	PSMF1
-0.000842	0.00081	MKLN1
-0.000852	0.00199	EHD4
-0.000941	0.0021	ZXDA
-0.000975	0.00116	LSM12
-0.00119	-0.00185	MFSD10
-0.0012	-0.000445	UHRF1BP1L
-0.00122	0.0033	RNF166
-0.00125	0.00106	MED13L
-0.0013	-0.00138	THTPA
-0.00133	-0.00253	DGKD
-0.00138	0.000891	GCFC2
-0.0014	0.00315	NUDT21
-0.0014	0.0006	MCM3AP
-0.00158	0.00423	GTPBP6
-0.00164	-0.000183	HNRNPA1
-0.00165	-0.00146	KAT8
-0.00167	-0.00133	MIOS
-0.00169	-0.00144	TBCCD1
-0.00172	0.00256	PHIP
-0.00175	-0.000575	RAB14
-0.00177	-0.00249	IFNGR2
-0.00191	-0.000105	TMEM219
-0.00192	0.000618	MOB4
-0.00192	0.00444	WDR45
-0.00194	-0.00325	RRN3
-0.00195	0.000857	UBR2
-0.0021	0.00216	SLC25A5
-0.0021	0.000263	ELL
-0.00221	-0.00156	USP3
-0.00228	-0.000735	WNK1
-0.00231	0.00349	IGKV1-9
-0.00237	0.00108	DDRGK1
-0.00242	0.00286	SWAP70
-0.00252	0.00144	THUMPD1
-0.00253	-7.76e-05	FXYD1
-0.00254	-0.0024	RAE1
-0.00254	0.00292	DNLZ
-0.00277	0.00192	SETX
-0.00278	-0.00116	TREX1
-0.00283	0.00216	YIPF3
-0.00288	0.004	ATP6V0B
-0.00292	0.00133	TMEM156
-0.00293	0.00496	USO1
-0.00299	-0.000486	FKBP8
-0.00304	0.00153	RBCK1
-0.0031	0.00283	GPR146
-0.00316	0.00176	SNX9
-0.00321	0.00511	URI1
-0.00322	0.000123	NBN
-0.00327	0.00242	ZBTB38
-0.00329	0.00226	KLHDC2
-0.00334	0.00358	PTS
-0.00339	0.00127	STYXL1
-0.0034	0.00582	NDUFS2
-0.00343	0.00393	MED30
-0.00349	0.004	DERL3
-0.00354	0.000268	KIAA0391
-0.00361	0.00132	SLC30A5
-0.00366	0.00352	WDR60
-0.00375	0.00529	RAB5C
-0.00375	0.00399	ATXN2L
-0.00383	-0.000565	SIMC1
-0.00388	0.00161	C8orf76
-0.0039	0.00414	ATP6V0E2
-0.00392	0.00225	SGF29
-0.00396	0.00441	ID1
-0.00404	0.0012	VPS4B
-0.0041	0.00245	B4GALT1
-0.00411	0.00364	ZDHHC6
-0.00413	0.00335	PPIF
-0.00415	0.00389	HNRNPL
-0.00415	0.00222	FNTA
-0.00419	0.00548	TRABD
-0.00419	-0.000274	PDS5A
-0.00426	0.00437	REV1
-0.00433	0.00169	KPNA4
-0.00437	0.00512	DENND4C
-0.00438	0.00263	DLST
-0.00438	0.00642	TANGO2
-0.00441	0.000454	SCAF1
-0.00443	0.00518	RBL2
-0.00446	0.00516	TMEM117
-0.00457	0.00345	MRPL45
-0.00461	0.00421	TTC17
-0.00467	0.00313	CEP350
-0.00467	0.00429	NCSTN
-0.00467	0.00306	HUWE1
-0.00468	0.000784	TP53INP1
-0.0047	0.00408	SFSWAP
-0.00471	-0.00203	MAZ
-0.00472	0.00164	POLR2M
-0.00477	0.00255	AP3D1
-0.00478	0.00256	ING5
-0.00479	0.00321	EPHA4
-0.00486	0.00339	MCPH1
-0.00503	0.00237	ARIH1
-0.00507	0.00271	HSPH1
-0.00511	0.00802	ABCC1
-0.00511	0.00546	ODF2
-0.00514	0.00305	NME4
-0.00514	0.00539	YY1AP1
-0.00518	0.00314	IGLV3-21
-0.00519	0.0028	ACIN1
-0.00522	0.00417	TUBGCP3
-0.00522	0.00269	RB1
-0.00524	0.00268	AP3B1
-0.00527	0.00341	C6orf89
-0.00533	0.00405	RNPEP
-0.00544	0.00928	MZF1
-0.00546	0.00555	DHPS
-0.00553	0.00388	CLK2
-0.00561	0.00367	ZNF585A
-0.00571	0.00375	TSR2
-0.00576	0.00652	CCDC186
-0.00588	0.00556	GYPC
-0.00594	0.00543	SLC9A7
-0.00599	0.00357	SYVN1
-0.00599	0.00508	RBM48
-0.00605	0.0018	LCOR
-0.00606	0.00582	NUP93
-0.00607	0.00367	CRCP
-0.00608	0.00404	TFDP1
-0.00611	0.00509	CDKN1B
-0.00643	0.00229	SNRNP70
-0.00643	0.0063	LMF2
-0.00649	0.00358	TTC21B
-0.0065	0.00552	TNFAIP3
-0.00651	0.00241	LRRFIP1
-0.00657	0.00538	SMARCA4
-0.00662	0.00495	TNS3
-0.00665	0.00469	MICAL3
-0.00669	0.00683	SCLT1
-0.00671	0.00483	ZNF23
-0.00672	0.00596	VTI1B
-0.00675	0.00673	FAM96A
-0.00681	0.00277	HSPA13
-0.00695	0.00522	TSC22D1
-0.00695	0.00795	PRPF4
-0.00695	0.00521	ARID4A
-0.007	0.00548	NRF1
-0.00701	0.00605	SMG8
-0.00702	0.00667	LINC00265
-0.00704	0.0027	BICD2
-0.00712	0.00726	LMBR1L
-0.00715	0.00754	RNF145
-0.00718	0.00708	GID8
-0.00718	0.00552	SH3GLB1
-0.0073	0.00511	PRCP
-0.00736	0.00578	AHR
-0.00736	0.00441	KCTD20
-0.00738	0.00521	SUPT16H
-0.00741	0.0055	DDOST
-0.00742	0.00588	CNPPD1
-0.00746	0.00419	DLD
-0.0076	0.00437	SPG7
-0.00761	0.00378	CCS
-0.00775	0.00531	NUCB1
-0.00779	0.00434	SIN3A
-0.0078	0.00373	PRPF3
-0.0079	0.00557	SLBP
-0.00797	0.00106	DEPDC5
-0.008	0.00489	SLC2A1
-0.00801	0.00536	SMC5
-0.00808	0.00616	ARHGEF6
-0.00811	0.00943	ELMO1
-0.00823	0.0045	DPH1
-0.00824	0.0066	NSUN7
-0.00835	0.00749	CNDP2
-0.00836	0.00736	MXD1
-0.00846	0.00408	TLR1
-0.0085	0.00912	IGHV3-11
-0.00854	0.00617	NIPAL2
-0.00858	0.00613	RAB2A
-0.00863	0.00619	APEH
-0.00863	0.00712	ST20-MTHFS
-0.00863	0.0066	ZNF141
-0.00872	0.00753	HBS1L
-0.00875	0.00417	FBRS
-0.00886	0.00641	HMGN2
-0.00891	0.00572	CHD4
-0.00896	0.00911	RPAP3
-0.009	0.00678	SLC25A1
-0.00901	0.00882	DNAJC1
-0.00903	0.00886	CRNKL1
-0.0091	0.00658	KIZ
-0.00914	0.00393	DYNLL1
-0.00914	0.0119	RHOG
-0.00916	0.00364	ZNF280D
-0.00919	0.00582	RECK
-0.0092	0.00744	GLO1
-0.00924	0.00637	JADE2
-0.00925	0.00515	MAP3K4
-0.00925	0.00914	FAM169A
-0.00925	0.00738	CSNK2A1
-0.00926	0.00537	BTN2A2
-0.00931	0.00582	TAZ
-0.00936	0.00626	NSFL1C
-0.00937	0.00709	MALT1
-0.00943	0.00828	KDSR
-0.00946	0.0112	OSBPL3
-0.00953	0.00458	ZBTB22
-0.00957	0.00615	TOR1B
-0.0096	0.00468	MKL1
-0.0096	0.00942	ZRANB1
-0.00964	0.00724	HNRNPA3
-0.00964	0.00747	AKAP11
-0.00967	0.00824	METTL21A
-0.00974	0.00906	STAM
-0.00978	0.0101	COMMD2
-0.00983	0.00796	ITPK1
-0.00985	0.00733	ARL4C
-0.0099	0.00725	LAP3
-0.00995	0.00465	MED25
-0.0101	0.00991	SEPHS2
-0.0101	0.0118	VTI1A
-0.0102	0.00628	RSBN1
-0.0103	0.00776	GNL3L
-0.0103	0.00828	ZFAND5
-0.0103	0.0122	WDR36
-0.0104	0.00642	SEC31A
-0.0105	0.00944	PLEKHA2
-0.0105	0.00819	KLHL22
-0.0107	0.0109	PARP12
-0.0107	0.00481	TOX4
-0.0107	0.00665	SYNE2
-0.0107	0.0116	SMARCD1
-0.0108	0.00954	YTHDF3
-0.0108	0.00655	RIC8A
-0.0108	0.0115	IGHV3-53
-0.0108	0.0138	ROCK1
-0.0108	0.00772	TAPT1
-0.0109	0.00788	GPATCH3
-0.0109	0.00799	SLC19A2
-0.011	0.00817	S1PR1
-0.0111	0.0101	VCPIP1
-0.0111	0.00696	PXK
-0.0113	0.00802	ST6GALNAC4
-0.0113	0.00893	CDKN2AIP
-0.0113	0.00866	SEC63
-0.0113	0.00895	MAN2A1
-0.0113	0.0104	ANP32E
-0.0114	0.00695	THAP4
-0.0115	0.00771	ZNF408
-0.0115	0.00613	ZNF266
-0.0115	0.00411	MAPKAP1
-0.0115	0.00893	BRF1
-0.0115	0.00718	ZC3H15
-0.0116	0.00849	MLST8
-0.0116	0.00551	DHX32
-0.0116	0.00607	IFNLR1
-0.0116	0.00932	WDR6
-0.0117	0.00705	HIP1R
-0.0117	0.00977	PPP1R12A
-0.0117	0.00965	SLC39A7
-0.0118	0.0114	ALDH16A1
-0.0119	0.00856	ZFC3H1
-0.0119	0.0101	GGA3
-0.012	0.00914	ZFAND4
-0.012	0.00987	DHRS7
-0.0121	0.0101	TMEM185B
-0.0121	0.0113	TNFSF13
-0.0121	0.011	STK40
-0.0121	0.0135	SMAD3
-0.0122	0.00907	INO80D
-0.0123	0.00973	TRPC4AP
-0.0123	0.00674	MED15
-0.0123	0.00893	JAK3
-0.0123	0.00954	SNIP1
-0.0123	0.00771	NT5DC1
-0.0124	0.0107	RBSN
-0.0124	0.00888	PTPDC1
-0.0124	0.0131	DHX35
-0.0124	0.00991	SEC62
-0.0125	0.0041	AL645728.1
-0.0125	0.00569	DNAJC14
-0.0125	0.0111	GPBP1L1
-0.0126	0.0113	KTN1
-0.0127	0.0132	CHST11
-0.0127	0.0119	CLTC
-0.0127	0.0115	SLC39A9
-0.0128	0.0103	IGHV1-18
-0.013	0.0113	TUBB4A
-0.013	0.0114	SLC50A1
-0.013	0.00876	TGIF2
-0.013	0.00712	RCAN3
-0.0131	0.00855	TFAM
-0.0132	0.00767	TARSL2
-0.0133	0.00766	ALDH18A1
-0.0133	0.00557	RNF111
-0.0135	0.012	PEX1
-0.0136	0.00736	PI4KA
-0.0136	0.00842	C3orf38
-0.0136	0.0103	ADIPOR1
-0.0137	0.0125	ELP5
-0.0137	0.00977	BAG4
-0.0137	0.00816	NONO
-0.0137	0.011	ACY1
-0.0138	0.0101	IL16
-0.0139	0.009	SPIN1
-0.0139	0.0119	KIF13B
-0.0139	0.00918	TADA3
-0.014	0.0114	LNPEP
-0.014	0.0113	TOR3A
-0.0141	0.00947	FAM107B
-0.0141	0.0091	HCFC1
-0.0141	0.0137	C11orf49
-0.0143	0.0101	MSH5
-0.0144	0.008	DIMT1
-0.0144	0.0147	AHCY
-0.0145	0.0135	PPP1R21
-0.0145	0.00811	KDM4C
-0.0145	0.0107	AGK
-0.0145	0.00925	RAB31
-0.0145	0.00994	ENDOD1
-0.0146	0.0109	HERC3
-0.0146	0.0141	ARPC4-TTLL3
-0.0148	0.00997	DGKA
-0.0148	0.00987	HIST2H2AC
-0.0148	0.0135	KDM6A
-0.0149	0.0152	NIPSNAP1
-0.0149	0.0115	CD19
-0.015	0.0146	SPTAN1
-0.015	0.0108	ZC3HAV1
-0.015	0.0117	THRAP3
-0.0151	0.0108	LINC01215
-0.0151	0.0112	TCF12
-0.0151	0.0112	C4orf33
-0.0151	0.00938	ITGAE
-0.0151	0.012	C11orf24
-0.0152	0.0147	ZNF84
-0.0152	0.0104	ARID4B
-0.0152	0.00968	DPP3
-0.0153	0.0142	OTULIN
-0.0153	0.0124	PBRM1
-0.0154	0.0116	SH2D3C
-0.0154	0.0117	PTPN23
-0.0154	0.0134	CNPY3
-0.0154	0.0156	TMEM50B
-0.0155	0.0112	MINK1
-0.0156	0.0103	SAAL1
-0.0156	0.0116	GCC2
-0.0157	0.00871	AP1G2
-0.0157	0.0133	RAP1GAP2
-0.0157	0.0146	RANGAP1
-0.0157	0.0116	ARRDC1
-0.0157	0.00949	TBC1D7
-0.0158	0.0136	MDN1
-0.0159	0.00799	MVP
-0.016	0.0131	RGMB
-0.0161	0.0167	CCDC125
-0.0161	0.0142	ATRX
-0.0161	0.0126	SLAMF1
-0.0162	0.0155	EIF4G3
-0.0162	0.0138	ITPR2
-0.0162	0.0171	FAM204A
-0.0162	0.014	MAGED1
-0.0164	0.0127	CSTF2
-0.0164	0.0145	STK38
-0.0164	0.0108	PPIL2
-0.0164	0.00989	UVRAG
-0.0165	0.0157	PTK2B
-0.0165	0.0136	RABL2A
-0.0166	0.0146	VPS13A
-0.0166	0.0127	ANKRD36B
-0.0166	0.0123	UBIAD1
-0.0166	0.0125	IRF2BPL
-0.0167	0.0152	HMGXB3
-0.0167	0.00929	TRIP12
-0.0167	0.0159	RASGEF1B
-0.0168	0.014	NUS1
-0.0168	0.0162	PPIP5K2
-0.017	0.0122	PSMD14
-0.0171	0.0118	EIF4E2
-0.0171	0.0154	SLC39A10
-0.0172	0.0148	NEK1
-0.0172	0.015	PARN
-0.0172	0.0137	CSRP1
-0.0174	0.0137	DLGAP4
-0.0174	0.0147	TLR9
-0.0175	0.0152	KLHL18
-0.0175	0.011	FARS2
-0.0175	0.0161	CEP104
-0.0176	0.0156	SNAP29
-0.0177	0.0154	ARFIP2
-0.0177	0.0142	CAPN2
-0.0178	0.0136	XAF1
-0.0179	0.0162	CSGALNACT1
-0.018	0.0139	FOXRED1
-0.018	0.0127	MMS19
-0.018	0.0165	SARM1
-0.0181	0.0155	PLK2
-0.0181	0.0141	NHP2
-0.0183	0.0153	CGRRF1
-0.0184	0.0118	YTHDC2
-0.0185	0.0189	BTG3
-0.0185	0.0128	SMC1A
-0.0186	0.0108	ERCC6L2
-0.0186	0.0144	EEF2
-0.0187	0.0152	SLAIN2
-0.0188	0.014	PARP8
-0.0189	0.0131	CXCR4
-0.0191	0.0148	POFUT2
-0.0191	0.014	MNAT1
-0.0191	0.0155	SPG21
-0.0192	0.0164	LATS1
-0.0192	0.0195	NDRG1
-0.0193	0.0159	NAF1
-0.0193	0.0168	GTF2H3
-0.0195	0.0172	IST1
-0.0195	0.0149	COX17
-0.0195	0.017	CYP4V2
-0.0197	0.0182	DCTN3
-0.0198	0.0177	ATR
-0.0198	0.0179	LANCL1
-0.0198	0.0179	SMG5
-0.0199	0.0137	HNRNPU
-0.0199	0.0145	ARIH2
-0.02	0.0173	TCF25
-0.02	0.0158	SEC16A
-0.02	0.0148	STARD3NL
-0.02	0.0135	TRIP11
-0.0201	0.0157	FKBP5
-0.0202	0.0137	CTPS1
-0.0202	0.0168	DCPS
-0.0202	0.0157	GNL1
-0.0202	0.0173	PPP2CA
-0.0202	0.0149	COX10
-0.0203	0.0135	TAF6L
-0.0203	0.0158	MYBBP1A
-0.0203	0.016	G6PD
-0.0204	0.0182	TMEM41B
-0.0204	0.0145	ALG11
-0.0204	0.0141	CCPG1
-0.0205	0.0147	NHEJ1
-0.0205	0.0186	EIF2B5
-0.0207	0.0187	YY1
-0.0208	0.0153	CD99L2
-0.0208	0.0161	STAMBP
-0.021	0.018	SZRD1
-0.0211	0.0182	PRPF40A
-0.0211	0.0144	TP53BP2
-0.0212	0.0173	EEF1B2
-0.0212	0.0188	ZNF395
-0.0212	0.0181	TFIP11
-0.0213	0.0196	PRKAR1A
-0.0213	0.017	SEC61B
-0.0213	0.015	KIAA1109
-0.0214	0.0195	RSU1
-0.0215	0.0176	THRB
-0.0216	0.0197	UBE2Q1
-0.0218	0.0172	ARRDC4
-0.0218	0.0144	UBE2D2
-0.0218	0.0187	PIP5K1B
-0.0218	0.0189	PEG10
-0.0219	0.0194	USP15
-0.0219	0.0174	TNPO1
-0.0219	0.0177	MAU2
-0.0219	0.0157	CHMP2B
-0.022	0.0148	TMEM62
-0.022	0.016	ZNF431
-0.022	0.0201	FAM160B1
-0.022	0.0152	INPP5F
-0.022	0.0185	PIAS4
-0.022	0.0206	RHOH
-0.022	0.0193	ADAM15
-0.0221	0.0165	ZGPAT
-0.0221	0.0174	PNMA1
-0.0222	0.0182	TBC1D25
-0.0225	0.0185	WDR45B
-0.0225	0.0159	SHC1
-0.0225	0.0186	ATP10D
-0.0226	0.0169	TMEM18
-0.0226	0.0152	TMEM115
-0.0227	0.0184	PPP2R5D
-0.0227	0.0187	EFHD2
-0.0227	0.0176	SRRT
-0.0228	0.0224	AGPAT5
-0.0228	0.0179	GNA13
-0.0228	0.0187	BCCIP
-0.0229	0.0149	TUBB4B
-0.023	0.0184	FBXO3
-0.023	0.0204	ZBTB21
-0.023	0.0209	PDE7B
-0.0232	0.02	ADAR
-0.0232	0.0163	BLK
-0.0233	0.0193	BFAR
-0.0233	0.018	FAF1
-0.0234	0.0189	ZCCHC8
-0.0234	0.0193	NFAT5
-0.0234	0.0214	SFT2D2
-0.0234	0.0175	ZNF844
-0.0234	0.019	TCTN1
-0.0235	0.0192	ANKRD11
-0.0237	0.0177	PIBF1
-0.0239	0.019	RAB7A
-0.0239	0.0198	BANP
-0.0239	0.0191	SPECC1L
-0.024	0.0184	HBP1
-0.024	0.022	HELZ
-0.024	0.0179	CPQ
-0.024	0.0137	UBTF
-0.0241	0.0198	PTGES2
-0.0242	0.0169	USP11
-0.0243	0.0184	ACSM3
-0.0243	0.0201	WBP11
-0.0243	0.0169	ZNF789
-0.0245	0.019	NR1H2
-0.0245	0.0228	CRY1
-0.0245	0.0194	ZNF316
-0.0245	0.0184	STRADA
-0.0245	0.0195	GANC
-0.0247	0.0183	RELT
-0.0247	0.021	SMG7
-0.0248	0.0179	TTC39C
-0.0248	0.0207	CPSF7
-0.0251	0.0172	SECISBP2
-0.0251	0.0173	COPS8
-0.0252	0.0204	TXNDC11
-0.0252	0.018	SMARCC2
-0.0252	0.0171	BCL7B
-0.0253	0.0169	DCP1A
-0.0253	0.021	TRPV2
-0.0253	0.0199	CTNNBIP1
-0.0253	0.0177	CEP85L
-0.0254	0.0221	EHBP1L1
-0.0255	0.02	ZNF770
-0.0255	0.0209	GNPAT
-0.0255	0.0199	STAT1
-0.0256	0.0193	SYAP1
-0.0256	0.0189	CCDC61
-0.0256	0.0165	TCF4
-0.0256	0.0197	ADORA2A
-0.0257	0.0198	ZNF669
-0.0257	0.0205	ACBD3
-0.0258	0.0178	IPMK
-0.0258	0.0214	CD82
-0.0258	0.0229	AC124312.1
-0.0259	0.0197	HLA-DPA1
-0.026	0.0186	CROCC
-0.0261	0.0194	ZNFX1
-0.0262	0.0184	B3GALT6
-0.0262	0.0232	SF3B5
-0.0263	0.0204	AVL9
-0.0263	0.0201	IGHV2-5
-0.0263	0.0214	MYSM1
-0.0264	0.0226	BTN3A1
-0.0264	0.0214	RSRC1
-0.0264	0.0206	ZNF267
-0.0265	0.0226	RLF
-0.0265	0.0206	FYCO1
-0.0265	0.0205	PIP4K2C
-0.0266	0.018	IGKV1D-8
-0.0266	0.0218	FBXO7
-0.0266	0.0187	NBAS
-0.0267	0.0223	CCT7
-0.0267	0.0224	LINC00667
-0.0268	0.0237	CHD6
-0.0269	0.0221	GPCPD1
-0.0269	0.02	MAD2L2
-0.0269	0.023	DTX3L
-0.0269	0.0224	VAV3
-0.0269	0.0173	DHX16
-0.0269	0.0223	IQCB1
-0.027	0.0194	DCP2
-0.027	0.0232	ANKRD12
-0.027	0.024	BACE2
-0.0271	0.0206	FCGRT
-0.0272	0.0222	BRD7
-0.0272	0.0234	SRGAP2
-0.0272	0.0222	PSMD1
-0.0272	0.0212	TRRAP
-0.0273	0.021	MCTP2
-0.0273	0.0191	ZNF263
-0.0274	0.0242	RUBCN
-0.0274	0.0214	TESK2
-0.0276	0.02	SNX1
-0.0276	0.0185	DSE
-0.0278	0.0222	PPP4R3B
-0.0278	0.0221	ZNF564
-0.0278	0.019	FASTKD1
-0.0278	0.0212	INTS1
-0.0279	0.0219	ULK4
-0.0279	0.0226	STEAP4
-0.028	0.023	SP3
-0.028	0.024	IVNS1ABP
-0.028	0.022	RBM15
-0.0281	0.0235	TMEM206
-0.0281	0.0239	GAPVD1
-0.0283	0.0221	ELL2
-0.0283	0.0247	MAP2K2
-0.0283	0.0214	GRIPAP1
-0.0284	0.0231	ASMTL
-0.0284	0.0242	API5
-0.0284	0.0221	RNF213
-0.0284	0.0221	PQBP1
-0.0284	0.0217	RASA2
-0.0285	0.0223	UBAP1
-0.0285	0.024	FOXJ3
-0.0285	0.0212	ZNF638
-0.0286	0.0213	ZNF721
-0.0286	0.0238	IGKV2D-28
-0.0289	0.0215	UBXN4
-0.0289	0.0238	ECE1
-0.0289	0.0212	DDX24
-0.029	0.0244	SS18
-0.0291	0.0231	KIAA1143
-0.0291	0.0252	NOP14
-0.0291	0.0209	GOT1
-0.0292	0.0214	CPNE5
-0.0292	0.0266	EIF4B
-0.0293	0.0233	PARP4
-0.0294	0.0241	CALCOCO2
-0.0295	0.0243	MUTYH
-0.0295	0.0205	NUP210
-0.0295	0.0245	BTBD9
-0.0296	0.0236	ST8SIA4
-0.0298	0.0237	MED29
-0.03	0.0237	STAU1
-0.03	0.0215	PPIB
-0.03	0.0235	SQLE
-0.0301	0.0201	NEIL1
-0.0302	0.0242	USP22
-0.0302	0.0248	ERAP2
-0.0302	0.0248	HIST2H2AA3
-0.0303	0.026	RAD51C
-0.0303	0.0217	TOLLIP
-0.0304	0.022	DSP
-0.0304	0.0224	ZNF487
-0.0306	0.0274	SLC41A3
-0.0306	0.0218	DARS
-0.0307	0.0258	NUDT18
-0.0307	0.0249	ASCC3
-0.0307	0.0245	ERCC6
-0.0307	0.0261	PIK3R1
-0.0308	0.0262	ARAP1
-0.0308	0.028	SIK1
-0.0308	0.0235	DAZAP1
-0.0308	0.0238	AUP1
-0.0308	0.0265	BRI3BP
-0.0309	0.0231	PPIH
-0.0309	0.0279	ENOX2
-0.0309	0.0238	NBPF15
-0.031	0.0256	RNF139
-0.0311	0.0238	RCN2
-0.0312	0.0221	ADD1
-0.0312	0.0262	NFKBID
-0.0313	0.0252	CDV3
-0.0313	0.0267	SRPK1
-0.0314	0.0258	TMEM248
-0.0314	0.0239	CEP295
-0.0315	0.0226	ATG13
-0.0315	0.0263	IGHV3-23
-0.0316	0.0241	RC3H1
-0.0316	0.025	YKT6
-0.0317	0.0289	SRPK2
-0.0319	0.0261	BCAS4
-0.0319	0.0254	CLINT1
-0.0319	0.0273	COPG1
-0.0319	0.0274	CYFIP2
-0.032	0.0277	ALOX5
-0.032	0.0263	PRRC1
-0.032	0.0239	ATG16L2
-0.0321	0.0233	RAB28
-0.0321	0.0275	HERPUD1
-0.0322	0.0234	SLC25A51
-0.0323	0.0237	ZFR
-0.0323	0.0206	TTC3
-0.0323	0.0272	NDFIP1
-0.0323	0.0239	AHCTF1
-0.0325	0.0251	GTF2B
-0.0325	0.0323	SCAMP2
-0.0326	0.0267	RP2
-0.0326	0.0244	LRBA
-0.0327	0.0209	FRS2
-0.0327	0.0286	SDAD1
-0.0329	0.0277	UHMK1
-0.0329	0.0266	EIF4A3
-0.0329	0.0257	VPS52
-0.033	0.0285	RABGGTA
-0.033	0.0254	APC
-0.033	0.0258	ALG13
-0.033	0.0281	IL3RA
-0.0331	0.0244	SNRPA
-0.0331	0.0298	KMO
-0.0332	0.028	SLC35F5
-0.0332	0.0271	DNAJC27
-0.0333	0.0286	SETDB1
-0.0333	0.0262	ERCC3
-0.0333	0.0277	HNRNPA2B1
-0.0334	0.0234	AMBRA1
-0.0334	0.0255	RIPK1
-0.0335	0.0279	SDR39U1
-0.0336	0.0246	CHST15
-0.0337	0.0248	TBC1D23
-0.0338	0.0276	ZNF426
-0.0338	0.0281	EXOC2
-0.0338	0.0269	IGLV1-51
-0.0339	0.032	SFXN1
-0.034	0.0249	PARP3
-0.034	0.027	R3HDM1
-0.034	0.0261	ITM2C
-0.034	0.0265	CCDC71
-0.034	0.0257	CARS
-0.034	0.0276	UNK
-0.034	0.0243	LDLRAD4
-0.0342	0.0245	RBM17
-0.0342	0.0244	TRAK2
-0.0342	0.0302	DDX47
-0.0343	0.0276	ATPAF1
-0.0343	0.029	SMNDC1
-0.0343	0.0287	FBXL4
-0.0344	0.0285	DCAF5
-0.0344	0.0298	SERP1
-0.0345	0.0278	DCAKD
-0.0345	0.0296	TERF2IP
-0.0346	0.0269	PAFAH1B1
-0.0346	0.0271	ETNK1
-0.0346	0.0272	EPS8
-0.0346	0.0263	LRRC41
-0.0347	0.0276	BCL2L11
-0.0347	0.0298	ZNF506
-0.0347	0.0263	RBM42
-0.0347	0.0254	VAMP3
-0.0349	0.0266	TMEM263
-0.035	0.0286	ZNF692
-0.0351	0.0279	LPXN
-0.0351	0.0297	HMG20B
-0.0352	0.0275	TMED10
-0.0352	0.0306	SYNE3
-0.0354	0.0273	TASP1
[truncated: 1,813 more rows]
