# Supplementary material for: Linking COVID-19 to Neurodegeneration: A Single-Cell Deep Learning Study of PBMCs in Multiple Sclerosis and Alzheimer’s Disease
Source: Research Square preprint supplement (doi:10.21203/rs.3.rs-7342199/v1), 2025-10-08
Supplement: Supplementary file 8 [file d9a209848b56ebc5a6102cf1.xlsx]

## Sheet: Sheet1
Table7. sorted_data_NK_MS
Class0	Class1	gene
1.57	-1.55	NBEAL1
1.25	-1.23	TCEAL8
1.21	-1.19	C1orf56
1.2	-1.19	TMSB4X
1.16	-1.14	ID2
1.15	-1.14	MYO1F
1.13	-1.12	FAM41C
1.1	-1.1	NACA2
1.08	-1.07	C10orf95
1.08	-1.06	ZNF90
1.07	-1.05	NHSL2
1.06	-1.05	GPR85
1.05	-1.04	CMC1
1.01	-0.991	UBB
0.999	-0.984	POLR2J3
0.987	-0.967	ATXN8OS
0.964	-0.947	IGKC
0.95	-0.927	TSNAX
0.945	-0.933	RNF43
0.921	-0.913	ARRDC5
0.915	-0.897	AC113404.1
0.899	-0.887	PLCE1
0.896	-0.881	KIR3DL3
0.89	-0.869	NDUFB8
0.889	-0.872	SELL
0.887	-0.868	KLRF1
0.885	-0.862	TRGC1
0.884	-0.864	TRDC
0.878	-0.858	XIST
0.863	-0.851	H3F3C
0.85	-0.832	S1PR4
0.846	-0.826	CLEC2D
0.846	-0.836	PBXIP1
0.838	-0.824	TLCD2
0.815	-0.801	PSMA4
0.814	-0.799	SUB1
0.81	-0.804	ARHGEF10
0.807	-0.801	PLAC8
0.806	-0.792	SOX6
0.802	-0.798	PMF1
0.799	-0.782	IRAK2
0.797	-0.784	CLIP4
0.797	-0.793	RAD9A
0.795	-0.786	TOR1AIP2
0.789	-0.772	SNX22
0.783	-0.773	CTC1
0.78	-0.77	AC245100.1
0.778	-0.767	HARS
0.768	-0.753	IFI16
0.764	-0.755	POLR2J2
0.762	-0.756	APOPT1
0.748	-0.743	FAM184B
0.742	-0.726	ALOX5AP
0.726	-0.709	NHLRC3
0.725	-0.715	UQCRHL
0.716	-0.709	C16orf54
0.712	-0.7	ARPC4
0.711	-0.698	SH3BP1
0.705	-0.692	CRNKL1
0.701	-0.69	MZT2B
0.698	-0.682	KARS
0.689	-0.678	AP2A2
0.686	-0.675	CMPK1
0.685	-0.673	GIMAP4
0.681	-0.67	SPTLC2
0.681	-0.679	HNRNPA1L2
0.675	-0.667	C6orf62
0.674	-0.669	KLRB1
0.673	-0.656	PSMB7
0.669	-0.666	ARPC1A
0.663	-0.647	STX6
0.654	-0.647	SYNC
0.648	-0.637	BRPF1
0.648	-0.64	GPM6B
0.648	-0.643	REV3L
0.642	-0.626	SCNN1A
0.642	-0.63	SNRPE
0.639	-0.631	PDIA4
0.638	-0.626	TRG-AS1
0.638	-0.63	NDUFA11
0.636	-0.623	SUMO1
0.633	-0.628	PPP4R3A
0.628	-0.612	ADNP
0.627	-0.624	IFNAR1
0.627	-0.615	UBXN6
0.626	-0.615	VAV3
0.626	-0.616	SBF2
0.626	-0.61	APOBEC3C
0.625	-0.619	CCZ1
0.623	-0.616	GLRX5
0.62	-0.604	ANKRD42
0.619	-0.61	ZNF843
0.616	-0.61	LINC00685
0.616	-0.601	ADAM8
0.612	-0.603	ASIC4
0.609	-0.602	ABHD1
0.608	-0.593	ZNF394
0.602	-0.598	DDX51
0.6	-0.586	LEAP2
0.599	-0.585	LSM5
0.598	-0.598	TYW5
0.598	-0.59	ZBTB16
0.596	-0.585	FAM129A
0.593	-0.578	ORMDL3
0.587	-0.58	EIF4G2
0.586	-0.578	FERMT2
0.584	-0.581	CCDC22
0.584	-0.568	COMMD6
0.582	-0.574	MAP4K5
0.58	-0.563	SHCBP1
0.579	-0.57	BLOC1S1
0.577	-0.569	KLRD1
0.575	-0.569	APEX1
0.574	-0.566	ABHD14A
0.574	-0.566	DTD1
0.574	-0.562	NONO
0.567	-0.559	SSTR2
0.567	-0.558	BOP1
0.566	-0.555	NAP1L1
0.563	-0.551	B3GAT2
0.563	-0.553	PSMD6
0.562	-0.557	FXN
0.562	-0.551	GABPB1
0.56	-0.551	CBX6
0.559	-0.547	ACAP1
0.559	-0.551	CD63
0.558	-0.549	NOA1
0.555	-0.547	WRN
0.554	-0.544	CTSD
0.554	-0.547	PSMA7
0.551	-0.541	C6orf48
0.55	-0.541	SIDT1-AS1
0.547	-0.535	PRCP
0.546	-0.532	MEI1
0.544	-0.538	ELAC2
0.539	-0.53	TTLL7
0.538	-0.526	ZNF559
0.532	-0.53	TSIX
0.531	-0.518	SRM
0.527	-0.518	PLCD1
0.527	-0.513	AC005480.1
0.527	-0.522	APOBEC3G
0.526	-0.519	PARP9
0.522	-0.509	SF3B2
0.521	-0.512	CNPY2
0.519	-0.509	LONRF1
0.519	-0.515	FAM215B
0.518	-0.515	EIF3E
0.518	-0.506	RNF11
0.516	-0.51	DUOX1
0.516	-0.512	SLC25A51
0.512	-0.503	WDR92
0.51	-0.498	NDUFA4
0.509	-0.502	HBB
0.509	-0.498	MCM6
0.508	-0.497	SYTL4
0.508	-0.499	CRYZ
0.504	-0.493	MAPKAPK5-AS1
0.503	-0.494	PSAP
0.501	-0.5	N4BP2L1
0.501	-0.495	YRDC
0.5	-0.49	PDCD2
0.5	-0.49	ANXA6
0.5	-0.493	RNF113A
0.498	-0.488	AREG
0.497	-0.493	GLI4
0.496	-0.487	PCMTD1
0.494	-0.486	TIPIN
0.493	-0.486	MAP4K1
0.493	-0.483	MICB
0.493	-0.482	WDR33
0.493	-0.49	MPV17L
0.492	-0.478	CSAD
0.491	-0.486	SCAMP4
0.491	-0.476	SNRPA1
0.49	-0.481	USB1
0.489	-0.483	SNHG15
0.489	-0.487	ICA1L
0.489	-0.477	NR1H2
0.489	-0.488	ST6GALNAC6
0.488	-0.477	HADHA
0.487	-0.481	SNRPB2
0.486	-0.475	PNRC2
0.483	-0.477	PARL
0.482	-0.474	HCG18
0.479	-0.471	SLC33A1
0.479	-0.472	RAD23A
0.478	-0.464	SNRPA
0.478	-0.474	PCYT2
0.477	-0.465	COLEC12
0.476	-0.471	BTBD10
0.473	-0.466	XKR8
0.472	-0.47	CALCOCO1
0.472	-0.462	TRGC2
0.471	-0.462	UQCRB
0.471	-0.462	HINT1
0.471	-0.455	DRAP1
0.469	-0.464	KCNJ3
0.468	-0.462	LINC00672
0.468	-0.455	PCSK7
0.466	-0.456	FBXO42
0.466	-0.457	SNF8
0.464	-0.453	CAPZA1
0.463	-0.45	WDR47
0.463	-0.455	NAP1L4
0.462	-0.455	MIS18BP1
0.457	-0.448	GPS1
0.455	-0.451	ITIH5
0.455	-0.458	IRF9
0.454	-0.441	UNC45A
0.452	-0.443	TMEM222
0.451	-0.437	XCL1
0.449	-0.441	PSMA3-AS1
0.447	-0.451	MDM4
0.447	-0.439	THUMPD3-AS1
0.446	-0.433	SLC19A3
0.446	-0.444	APLP1
0.446	-0.444	HNRNPAB
0.444	-0.435	GHRL
0.443	-0.436	ACAA2
0.443	-0.429	CEACAM21
0.442	-0.434	MAP1LC3B2
0.44	-0.436	ALDOA
0.438	-0.427	GALNT2
0.436	-0.427	BET1L
0.435	-0.431	ABCF2
0.435	-0.427	GTF3C5
0.433	-0.427	TTC19
0.433	-0.426	AKT2
0.433	-0.427	ZNF138
0.431	-0.428	COMMD7
0.431	-0.426	TRADD
0.43	-0.422	GIMAP6
0.43	-0.428	HNRNPA3
0.43	-0.423	ATPAF1
0.428	-0.426	PDCD7
0.428	-0.425	NMNAT1
0.427	-0.419	HACE1
0.427	-0.415	SLBP
0.426	-0.41	PI4KB
0.425	-0.421	CNPY3
0.423	-0.418	ZNF836
0.423	-0.416	LINC00330
0.423	-0.414	DEGS2
0.422	-0.417	AP003774.1
0.422	-0.42	FTSJ1
0.421	-0.412	RBX1
0.421	-0.413	SLX1B
0.421	-0.413	HMGB2
0.418	-0.418	TTL
0.418	-0.412	COX7B
0.417	-0.41	RANBP10
0.416	-0.405	UBA52
0.415	-0.407	MALAT1
0.414	-0.405	TMEM120B
0.414	-0.407	AC006369.2
0.413	-0.403	PDZD8
0.413	-0.402	RPAP2
0.412	-0.408	RIPK3
0.412	-0.402	RHOF
0.411	-0.405	HNRNPR
0.41	-0.401	TRIM21
0.409	-0.401	PPIAL4G
0.409	-0.4	HDGF
0.409	-0.399	PPP2CA
0.409	-0.401	ISG15
0.407	-0.4	ARID3A
0.407	-0.404	FAM234A
0.407	-0.398	SGF29
0.406	-0.404	VAV1
0.406	-0.397	SRGN
0.405	-0.406	FUNDC2
0.404	-0.398	SNX11
0.403	-0.396	COX7A2
0.403	-0.402	ATP1B3
0.403	-0.392	TAP1
0.402	-0.39	RP2
0.401	-0.398	UGP2
0.397	-0.388	B2M
0.396	-0.393	HLA-G
0.396	-0.393	POGZ
0.396	-0.389	AP1B1
0.395	-0.387	ZNF749
0.395	-0.39	FARS2
0.395	-0.387	GPR171
0.394	-0.388	HYOU1
0.39	-0.384	ICAM2
0.389	-0.386	PTPRH
0.389	-0.383	CBWD3
0.389	-0.386	ETF1
0.389	-0.379	HIVEP2
0.388	-0.383	RCOR1
0.385	-0.38	GPR82
0.384	-0.378	LINC01481
0.384	-0.378	PHKG1
0.383	-0.378	CDK5RAP3
0.383	-0.379	PTS
0.382	-0.373	PGP
0.381	-0.381	ANAPC2
0.38	-0.379	GPM6A
0.38	-0.378	CHPT1
0.379	-0.373	AGK
0.379	-0.369	XRN1
0.378	-0.366	SRSF2
0.376	-0.372	ARPC2
0.375	-0.367	PRCC
0.375	-0.372	C9orf139
0.374	-0.368	PSMD5
0.374	-0.368	IMPDH1
0.374	-0.372	MPG
0.374	-0.369	KCTD19
0.373	-0.37	ELL
0.373	-0.365	EIF1
0.372	-0.363	RHBDD2
0.372	-0.359	ALDH16A1
0.372	-0.37	MRPL23
0.37	-0.358	TRIM34
0.37	-0.372	SLC35E3
0.369	-0.36	YKT6
0.369	-0.36	MIR222HG
0.369	-0.361	VAC14
0.368	-0.367	CLUAP1
0.368	-0.358	PIK3IP1
0.367	-0.366	PJA2
0.365	-0.358	COPB2
0.365	-0.357	UBE2L6
0.365	-0.359	PRMT9
0.364	-0.358	EML2
0.364	-0.357	SLC25A45
0.363	-0.355	DISP2
0.363	-0.354	HLA-C
0.361	-0.357	USO1
0.36	-0.348	GMFG
0.36	-0.357	TYK2
0.359	-0.362	ATXN7
0.359	-0.35	FLOT2
0.359	-0.35	DNAJC2
0.358	-0.353	HUS1
0.358	-0.346	CCDC130
0.358	-0.359	CPD
0.357	-0.357	POMP
0.356	-0.349	IGHA1
0.355	-0.346	LRRC47
0.354	-0.35	CXXC5
0.353	-0.351	ZBTB24
0.353	-0.348	EGR2
0.352	-0.349	APBA3
0.352	-0.348	TSPAN14
0.351	-0.352	SUPT5H
0.351	-0.344	CLTC
0.35	-0.35	HMGCL
0.35	-0.343	RAB7A
0.35	-0.342	ITM2A
0.349	-0.341	NGDN
0.349	-0.338	BAZ1B
0.348	-0.341	PEX6
0.348	-0.353	HAP1
0.348	-0.338	MYSM1
0.347	-0.341	IPO7
0.347	-0.339	ILF2
0.347	-0.343	EDF1
0.346	-0.343	CD151
0.346	-0.337	CREBRF
0.345	-0.338	RBMS1
0.345	-0.341	TBL3
0.345	-0.339	DGKZ
0.345	-0.334	RIC8A
0.344	-0.335	C7orf26
0.344	-0.337	GZMA
0.344	-0.345	SYTL1
0.344	-0.334	TTPAL
0.344	-0.338	SLC16A4
0.34	-0.335	PDE6D
0.339	-0.329	CEP85L
0.339	-0.33	OSM
0.339	-0.343	CDKN2D
0.338	-0.331	AVL9
0.338	-0.334	CRELD2
0.338	-0.335	CALM3
0.337	-0.328	ERAP1
0.337	-0.329	FBP1
0.336	-0.336	PPM1A
0.336	-0.33	BRAT1
0.336	-0.331	TBC1D5
0.335	-0.332	SMAD3
0.335	-0.332	DEDD
0.335	-0.327	EPB42
0.335	-0.335	RGS19
0.335	-0.327	IFT52
0.334	-0.333	UBA2
0.334	-0.33	EPHA4
0.333	-0.327	RBM34
0.332	-0.332	TMEM150B
0.331	-0.322	CXCL14
0.331	-0.325	KDM7A
0.331	-0.328	TMED9
0.33	-0.324	ZXDA
0.329	-0.319	GIMAP7
0.329	-0.322	SARM1
0.328	-0.328	SPECC1
0.328	-0.316	SMU1
0.328	-0.323	PLD3
0.327	-0.316	DNPEP
0.327	-0.321	GSE1
0.326	-0.32	DUSP18
0.325	-0.322	TTC4
0.325	-0.312	TRPS1
0.324	-0.324	DAP3
0.323	-0.316	RNF135
0.323	-0.32	ARHGAP1
0.323	-0.316	VKORC1
0.322	-0.314	ZBTB44
0.321	-0.321	DMXL1
0.321	-0.323	GATAD2A
0.32	-0.314	LMNA
0.32	-0.311	TSR3
0.32	-0.316	MLLT3
0.32	-0.316	TRMT1
0.319	-0.313	SPON1
0.319	-0.315	DHX16
0.319	-0.315	APEH
0.317	-0.31	POLR1B
0.316	-0.316	PDCD4
0.315	-0.305	ABHD17A
0.315	-0.304	TMEM117
0.315	-0.308	FAHD2B
0.314	-0.304	ASMTL
0.313	-0.307	ACE
0.313	-0.306	ATP1A1
0.312	-0.306	SGTA
0.312	-0.309	MYL6
0.311	-0.299	ASNA1
0.31	-0.303	NEDD8
0.31	-0.307	ELMO1
0.309	-0.306	ERH
0.307	-0.303	GBP4
0.307	-0.301	P2RY8
0.306	-0.3	OSBPL8
0.306	-0.296	FAM3A
0.305	-0.296	ZFP1
0.305	-0.31	PRKRIP1
0.304	-0.293	SSFA2
0.304	-0.297	FRYL
0.304	-0.3	MFSD11
0.302	-0.299	CXCR2
0.302	-0.297	STIP1
0.302	-0.296	SOAT1
0.301	-0.291	VOPP1
0.301	-0.3	GANAB
0.301	-0.299	RALA
0.301	-0.296	CHMP4A
0.301	-0.293	NUDT21
0.3	-0.289	HSPA4L
0.3	-0.293	PPP1R35
0.3	-0.298	GRAMD1A
0.299	-0.293	MCUR1
0.298	-0.304	S1PR3
0.298	-0.296	CCDC184
0.298	-0.291	CHRAC1
0.297	-0.287	C1QBP
0.297	-0.29	LAT2
0.296	-0.293	SAR1B
0.296	-0.294	HPS3
0.295	-0.297	PIGS
0.295	-0.295	TBC1D17
0.295	-0.293	LTA4H
0.295	-0.296	NSMCE3
0.293	-0.286	PPM1M
0.292	-0.293	LRP5L
0.292	-0.292	IFNGR1
0.291	-0.285	CASC1
0.291	-0.29	KIDINS220
0.29	-0.289	ANXA4
0.289	-0.277	RRP12
0.289	-0.286	CPNE3
0.289	-0.284	ERI3
0.289	-0.289	C19orf24
0.288	-0.279	CORO1A
0.288	-0.286	RBM15
0.288	-0.284	COPA
0.287	-0.274	MAN1B1
0.286	-0.28	PHAX
0.286	-0.28	DDX3X
0.286	-0.283	USPL1
0.285	-0.285	AMD1
0.285	-0.285	GGPS1
0.285	-0.283	GOLM1
0.285	-0.283	B4GALT3
0.285	-0.284	PRRC2C
0.284	-0.287	NCKAP1L
0.283	-0.281	ATG16L1
0.282	-0.277	RBFOX3
0.282	-0.275	AQR
0.281	-0.28	LSM1
0.281	-0.277	HBA2
0.28	-0.274	SEC61G
0.28	-0.275	TFE3
0.279	-0.27	TLN1
0.278	-0.273	VPS11
0.277	-0.271	OAZ1
0.277	-0.268	YWHAH
0.277	-0.273	PAFAH1B1
0.276	-0.272	TOX
0.275	-0.268	ADK
0.275	-0.267	ARL4D
0.274	-0.271	CRYL1
0.274	-0.268	CYTH3
0.274	-0.271	LUC7L2
0.273	-0.27	USP33
0.273	-0.27	TMEM63B
0.273	-0.274	ZNF644
0.271	-0.27	NCMAP
0.271	-0.263	AHCY
0.27	-0.27	EVI2B
0.27	-0.265	GMDS
0.27	-0.265	CHI3L2
0.269	-0.264	CTSW
0.268	-0.262	XRN2
0.267	-0.263	UCHL5
0.266	-0.264	VPS51
0.266	-0.263	PEBP1
0.265	-0.264	SUMF1
0.264	-0.264	CLPTM1
0.263	-0.256	ENPP4
0.263	-0.264	GBP7
0.263	-0.267	PSMA2
0.262	-0.264	DNAJC21
0.261	-0.254	LEPROTL1
0.261	-0.263	LRRC41
0.26	-0.258	C18orf25
0.259	-0.256	TAF3
0.257	-0.253	TIA1
0.256	-0.25	MGAT4B
0.256	-0.255	API5
0.256	-0.253	SLC35A4
0.255	-0.243	RSL1D1
0.255	-0.248	JMJD1C
0.254	-0.248	PSME3
0.254	-0.252	LHPP
0.254	-0.249	DENND3
0.253	-0.246	NECAP1
0.253	-0.253	RBM48
0.253	-0.243	BAD
0.253	-0.251	RNF114
0.253	-0.247	INVS
0.253	-0.249	SKP1
0.253	-0.249	PEF1
0.252	-0.249	PMF1-BGLAP
0.252	-0.247	EEF2
0.251	-0.247	GGA3
0.251	-0.249	SRA1
0.251	-0.243	RAB29
0.25	-0.242	DVL2
0.25	-0.252	COG8
0.25	-0.24	ZNF302
0.249	-0.249	PSMA1
0.249	-0.245	IRF5
0.249	-0.243	TNIK
0.249	-0.246	STAG2
0.249	-0.238	NPIPB11
0.248	-0.242	PLBD2
0.248	-0.244	ZNF384
0.248	-0.239	GPR183
0.248	-0.243	ABHD2
0.247	-0.244	GIMAP5
0.247	-0.241	MRPS15
0.246	-0.243	TYMP
0.246	-0.238	PRDM10
0.246	-0.248	RTN3
0.246	-0.239	ADCY7
0.245	-0.241	MALT1
0.245	-0.24	DDOST
0.245	-0.245	USP1
0.244	-0.245	PEX3
0.244	-0.233	FKBP8
0.244	-0.243	SEC24D
0.242	-0.238	C4orf47
0.241	-0.242	FAM53C
0.241	-0.236	TPST1
0.24	-0.232	CEP350
0.24	-0.237	IARS2
0.24	-0.241	SCAP
0.239	-0.233	SPAG4
0.239	-0.233	UBIAD1
0.238	-0.231	TLK1
0.238	-0.238	FCER1G
0.237	-0.234	ZBED1
0.236	-0.232	CNPPD1
0.236	-0.234	DIP2B
0.235	-0.231	RNPEPL1
0.235	-0.232	ATP7A
0.235	-0.236	ZNF414
0.234	-0.236	MGAT1
0.234	-0.232	CSNK1A1
0.233	-0.23	NCSTN
0.233	-0.23	ARHGAP19
0.232	-0.229	C3orf38
0.232	-0.225	GTF2F1
0.231	-0.227	MCPH1
0.231	-0.232	STARD3
0.231	-0.225	TM9SF4
0.23	-0.22	JOSD1
0.23	-0.224	IL16
0.23	-0.227	RECQL
0.23	-0.22	JMJD6
0.23	-0.223	PRPF19
0.23	-0.232	EIF5AL1
0.23	-0.225	RABIF
0.23	-0.223	MCCC1
0.229	-0.234	PRKCSH
0.229	-0.221	CCNI
0.229	-0.223	RNF4
0.228	-0.221	C2orf49
0.228	-0.22	DTX3
0.228	-0.224	ADGRG5
0.226	-0.22	PHF11
0.226	-0.228	LIX1L
0.225	-0.223	CTR9
0.225	-0.219	HEATR1
0.224	-0.218	MRPL37
0.224	-0.217	GNLY
0.224	-0.223	PSMD2
0.224	-0.225	ZC3HAV1
0.223	-0.211	SNRPG
0.223	-0.222	HMGCS1
0.222	-0.223	SYNJ2BP
0.221	-0.209	RMDN3
0.221	-0.218	ZDHHC7
0.221	-0.217	SLC7A6
0.22	-0.216	DOCK11
0.22	-0.223	SH3BP5
0.219	-0.217	CREB1
0.219	-0.208	ABTB1
0.219	-0.22	ACTR2
0.219	-0.219	HSPA13
0.218	-0.21	LMO4
0.218	-0.212	SFPQ
0.218	-0.209	UBL7
0.218	-0.209	INO80
0.218	-0.21	NOP14
0.218	-0.213	SP100
0.217	-0.214	ZNF639
0.215	-0.208	CACNA1C-AS1
0.215	-0.209	ZNF331
0.215	-0.214	ISG20L2
0.214	-0.213	HBA1
0.214	-0.21	SUSD6
0.213	-0.209	PRPF40A
0.213	-0.214	R3HCC1L
0.212	-0.215	PPP1CB
0.212	-0.207	EXOSC9
0.211	-0.207	GPR137B
0.211	-0.207	RNASEH1
0.21	-0.208	TRIM28
0.21	-0.213	BTBD6
0.209	-0.206	LY9
0.208	-0.207	UQCRC1
0.208	-0.205	MFN2
0.208	-0.201	CMKLR1
0.207	-0.201	FBXL6
0.207	-0.211	ZNF286A
0.207	-0.203	COX7C
0.207	-0.202	CALHM2
0.207	-0.204	STAT1
0.207	-0.202	PPP3CC
0.207	-0.204	PIGX
0.206	-0.198	COMMD3
0.205	-0.192	DAXX
0.204	-0.199	ZNF627
0.203	-0.199	EOMES
0.203	-0.196	PRNP
0.203	-0.197	CYBA
0.203	-0.202	C1GALT1
0.202	-0.195	PITPNC1
0.202	-0.202	BCL10
0.202	-0.2	LARS
0.202	-0.194	ODF3B
0.202	-0.202	IFT57
0.202	-0.203	P2RY11
0.201	-0.195	EXOC2
0.2	-0.201	PELP1
0.2	-0.193	CCT4
0.2	-0.191	IL2RB
0.199	-0.193	STAG3
0.199	-0.195	SAP30BP
0.198	-0.196	HNRNPA1
0.197	-0.196	IPO5
0.197	-0.193	SIPA1
0.196	-0.195	VPS26B
0.195	-0.187	CCDC66
0.195	-0.191	VTA1
0.195	-0.19	PARP12
0.195	-0.185	LPIN2
0.194	-0.189	RANGAP1
0.194	-0.195	TRIM26
0.193	-0.188	HSF1
0.193	-0.187	ARHGAP12
0.192	-0.187	MZF1
0.192	-0.195	ANGPT2
0.192	-0.189	DENND1B
0.191	-0.187	ACSS1
0.191	-0.187	TMEM167B
0.191	-0.187	TBC1D25
0.191	-0.195	MFSD8
0.191	-0.189	CKAP5
0.19	-0.185	ZBTB7A
0.189	-0.186	DCAF7
0.189	-0.188	GNAS
0.189	-0.182	TXNIP
0.188	-0.187	CTNNBIP1
0.188	-0.179	NME8
0.187	-0.183	SAMD9
0.187	-0.181	PPP1R2
0.187	-0.184	ST20-MTHFS
0.186	-0.187	PPP6C
0.186	-0.18	TFDP2
0.186	-0.186	ICMT
0.184	-0.178	KLF12
0.184	-0.184	CBR4
0.183	-0.183	PTPN11
0.183	-0.17	HERC3
0.183	-0.181	STAMBPL1
0.182	-0.181	SMYD2
0.182	-0.178	LRCH1
0.182	-0.176	WDR18
0.181	-0.179	TET2
0.181	-0.17	PSTPIP1
0.181	-0.177	NFKB2
0.18	-0.174	GRHL1
0.18	-0.176	STK4
0.18	-0.171	KDM1B
0.18	-0.174	ATP2A3
0.179	-0.183	HIST1H2BF
0.177	-0.172	RSRC1
0.177	-0.178	SCYL1
0.175	-0.172	ADRB2
0.174	-0.176	TRAF3IP3
0.174	-0.174	DHRS13
0.174	-0.175	SAR1A
0.174	-0.168	CCT5
0.174	-0.168	ZNF524
0.174	-0.168	UBE2Q2
0.173	-0.167	MYOM2
0.173	-0.163	DNAJC4
0.173	-0.166	SLC16A1-AS1
0.173	-0.17	C1orf174
0.173	-0.167	CREBZF
0.172	-0.173	DCTN2
0.171	-0.173	IKBIP
0.171	-0.167	NOMO2
0.171	-0.17	MAGED2
0.171	-0.162	SLC26A2
0.171	-0.164	SPCS2
0.171	-0.17	CLCN3
0.171	-0.175	MPV17
0.17	-0.17	GALNT3
0.17	-0.159	NCOA7
0.17	-0.167	SYK
0.168	-0.163	RAC1
0.168	-0.162	HIST1H2AB
0.167	-0.16	GABPB1-AS1
0.166	-0.16	HOXB-AS1
0.166	-0.163	RNF167
0.165	-0.166	PRR4
0.165	-0.16	LTB4R2
0.165	-0.162	RDH5
0.165	-0.162	ERCC3
0.165	-0.166	FLCN
0.165	-0.163	RAPGEF1
0.165	-0.163	BTBD9
0.165	-0.162	HSPB1
0.164	-0.165	DDX39A
0.164	-0.16	YTHDC1
0.164	-0.157	ARRDC2
0.163	-0.164	WWP1
0.163	-0.162	CCNL2
0.163	-0.159	KIR2DL1
0.162	-0.16	RNF125
0.162	-0.16	CUEDC2
0.162	-0.155	DYNLL1
0.161	-0.159	APC
0.161	-0.162	RBAK-RBAKDN
0.161	-0.156	EPN1
0.161	-0.16	EBLN2
0.161	-0.157	LINC00987
0.16	-0.155	MAPK7
0.16	-0.159	PIP4K2C
0.16	-0.158	NFYC
0.16	-0.152	TAF2
0.159	-0.156	OSBPL2
0.159	-0.151	TOMM20
0.158	-0.159	CDC27
0.158	-0.158	MBD6
0.158	-0.157	PTBP1
0.158	-0.155	FAM89B
0.158	-0.156	NRIP1
0.158	-0.155	COQ10A
0.158	-0.152	GSPT1
0.158	-0.155	ACTR1A
0.157	-0.155	CITED4
0.157	-0.149	HLA-DPA1
0.157	-0.153	AAGAB
0.157	-0.154	FAM199X
0.157	-0.152	MSL2
0.156	-0.155	KLHL9
0.155	-0.15	HECTD1
0.154	-0.153	PSMD11
0.154	-0.151	GORASP2
0.154	-0.153	LONRF3
0.154	-0.152	EIF4A1
0.154	-0.145	TRA2A
0.154	-0.154	PIBF1
0.154	-0.158	IKBKE
0.153	-0.151	PDF
0.153	-0.153	EIF2AK1
0.152	-0.151	MAP7D1
0.152	-0.152	CCDC97
0.152	-0.156	MAP2K2
0.152	-0.152	CPSF1
0.151	-0.151	AP3M1
0.151	-0.15	PTDSS1
0.151	-0.153	MIER1
0.151	-0.146	CAPN2
0.15	-0.142	TPM4
0.149	-0.147	P4HB
0.148	-0.144	GLTP
0.148	-0.142	TARS
0.148	-0.143	ALKBH6
0.147	-0.15	CCDC102A
0.147	-0.138	AMPD2
0.147	-0.141	TSPAN2
0.146	-0.143	SBNO2
0.146	-0.144	XXYLT1
0.146	-0.142	MYO5A
0.146	-0.141	SMARCD1
0.145	-0.137	ACADVL
0.144	-0.144	TCERG1
0.144	-0.14	TRAV27
0.144	-0.137	KATNBL1
0.144	-0.141	COPS2
0.143	-0.139	TELO2
0.143	-0.138	AIP
0.143	-0.145	POR
0.143	-0.146	TOMM40
0.143	-0.139	ARF4-AS1
0.143	-0.143	LMOD3
0.142	-0.137	CNN2
0.142	-0.141	H3F3A
0.142	-0.14	HLA-DRB1
0.141	-0.137	ERCC5
0.141	-0.144	VPS4A
0.141	-0.138	TTC12
0.14	-0.137	HK1
0.14	-0.139	NXF1
0.14	-0.137	ANKRD37
0.14	-0.139	NFKB1
0.139	-0.137	BFAR
0.138	-0.137	UBE2Q1
0.137	-0.14	C6orf136
0.137	-0.136	NOC4L
0.137	-0.137	CCDC12
0.137	-0.134	ZAP70
0.136	-0.13	ELF1
0.136	-0.133	EPS8
0.136	-0.135	CHD1
0.136	-0.131	TUBA1C
0.135	-0.136	SYTL2
0.134	-0.132	COG5
0.134	-0.132	ITGB1
0.134	-0.129	SETDB1
0.134	-0.126	USP53
0.133	-0.129	PSMB10
0.133	-0.127	SART3
0.133	-0.131	C4orf48
0.133	-0.13	GOLPH3
0.133	-0.131	AP4B1
0.133	-0.13	KDM2B
0.132	-0.135	MED27
0.132	-0.126	MYO6
0.132	-0.125	CALM2
0.131	-0.127	STARD7
0.131	-0.127	P4HTM
0.131	-0.125	RRAS2
0.131	-0.123	GNS
0.131	-0.127	EP300
0.131	-0.13	ZNF518A
0.13	-0.132	ETFDH
0.13	-0.125	KLRC4
0.13	-0.125	LRRC14
0.129	-0.129	GOT1
0.129	-0.125	SIK1
0.129	-0.127	TUBB2A
0.128	-0.126	XRCC6
0.128	-0.125	SLC4A1AP
0.128	-0.123	JAK2
0.127	-0.121	KTN1
0.127	-0.121	UFM1
0.126	-0.125	EMC7
0.126	-0.128	HIBADH
0.126	-0.126	FAM111A
0.126	-0.122	ZNRD1
0.126	-0.129	GREM1
0.125	-0.123	BOD1L1
0.125	-0.126	TMED4
0.124	-0.119	MAFF
0.124	-0.129	JADE2
0.124	-0.128	ANKRD13C
0.124	-0.118	MBNL2
0.124	-0.119	COPS7A
0.123	-0.12	EP400
0.123	-0.122	CCDC69
0.123	-0.122	ST7L
0.123	-0.122	PGS1
0.123	-0.122	ABHD12
0.122	-0.119	CATSPER2
0.122	-0.12	PPP4R2
0.121	-0.116	ZNF365
0.121	-0.118	HNRNPH2
0.121	-0.119	EDC4
0.12	-0.123	NAF1
0.119	-0.118	TYROBP
0.119	-0.11	SIAH2
0.119	-0.113	HIST1H2AJ
0.119	-0.118	TMEM248
0.118	-0.117	FOXN3
0.118	-0.123	PRELID1
0.118	-0.117	HCFC1R1
0.118	-0.114	RNGTT
0.118	-0.111	ADAR
0.118	-0.111	ENDOD1
0.118	-0.12	LTN1
0.117	-0.11	WDR7
0.116	-0.115	LINC00278
0.115	-0.114	DIDO1
0.115	-0.115	LIMK2
0.115	-0.116	APH1A
0.115	-0.111	KPNA4
0.114	-0.109	TRPT1
0.113	-0.11	SUPT6H
0.113	-0.103	HTATSF1
0.113	-0.106	PARP6
0.113	-0.106	YY1
0.113	-0.104	BTG1
0.113	-0.111	TONSL
0.113	-0.108	NUDT4
0.112	-0.116	RABEP1
0.112	-0.112	PLIN3
0.112	-0.113	VCPKMT
0.111	-0.111	NFE2L2
0.111	-0.115	PTPN6
0.111	-0.107	ZBTB45
0.111	-0.107	SMARCB1
0.11	-0.112	RRBP1
0.11	-0.107	GOLGB1
0.11	-0.11	GRK6
0.109	-0.112	TCTN3
0.109	-0.105	TOMM7
0.109	-0.104	ATP13A1
0.109	-0.108	ANAPC1
0.109	-0.104	FBXO33
0.108	-0.108	SFXN3
0.108	-0.105	TMEM189
0.108	-0.102	CD37
0.108	-0.11	RABGEF1
0.108	-0.11	CCSER2
0.107	-0.115	XAB2
0.107	-0.105	PHF20L1
0.106	-0.105	FBXO7
0.106	-0.103	MCMBP
0.106	-0.101	PRICKLE3
0.106	-0.102	SARAF
0.106	-0.104	PLEKHJ1
0.105	-0.0968	PTPN23
0.105	-0.101	U2AF2
0.105	-0.0998	GPR108
0.105	-0.0969	PEX11B
0.105	-0.105	HRAS
0.104	-0.104	ZNF326
0.104	-0.099	ANP32E
0.104	-0.107	ZXDC
0.103	-0.101	ZCCHC7
0.102	-0.0983	KLF10
0.102	-0.101	NEK6
0.102	-0.0931	MAP2K6
0.102	-0.1	ANXA1
0.101	-0.097	PIP4K2A
0.101	-0.0991	C16orf87
0.101	-0.0973	PTPN14
0.0998	-0.102	COMMD5
0.0998	-0.0956	DHX37
0.0997	-0.0914	WASF2
0.0985	-0.101	QRICH1
0.0983	-0.0971	ERVK3-1
0.0983	-0.098	ZFAND6
0.0976	-0.0994	SYVN1
0.0972	-0.101	NEK5
0.0967	-0.096	DNTTIP2
0.0965	-0.0993	HM13
0.0963	-0.0978	OSBPL9
0.096	-0.092	ACY1
0.0955	-0.0922	GNA13
0.0948	-0.0894	GTF2H5
0.0946	-0.0886	CNOT10
0.0944	-0.0904	ELP5
0.0943	-0.0883	OAS2
0.0936	-0.0974	LMNB1
0.0933	-0.0914	GNPDA1
0.093	-0.0838	CPT1A
0.0925	-0.0923	MRPS21
0.0922	-0.0874	PTP4A2
0.0916	-0.0911	ANKRD27
0.0911	-0.0843	NMUR1
0.0909	-0.0897	IFFO1
0.0909	-0.088	LAP3
0.0907	-0.0919	ZFAND2B
0.0904	-0.0876	FLII
0.0903	-0.0934	GCLM
0.0902	-0.0861	COG1
0.0899	-0.085	OXR1
0.0899	-0.0917	ATL3
0.0898	-0.0891	PRRC1
0.0895	-0.0876	ORAI1
0.0888	-0.0815	RBM23
0.0884	-0.0876	NDUFC2
0.0881	-0.0877	OTUB1
0.088	-0.0811	RAB5B
0.0879	-0.0856	ZNF699
0.0879	-0.0857	ARL4C
0.0878	-0.0824	SNX18
0.0878	-0.089	RAD18
0.0876	-0.087	PATL1
0.0875	-0.0866	SNX10
0.0872	-0.0809	ATG5
0.0867	-0.0845	CYB5R3
0.0864	-0.0876	LINC01465
0.086	-0.0801	GGA1
0.0856	-0.0841	MAPK6
0.0855	-0.092	SRPK2
0.0852	-0.0885	FAM49B
0.0846	-0.0922	ZNF320
0.0843	-0.0833	BCL7C
0.0842	-0.0811	CRCP
0.084	-0.0848	SMIM4
0.0839	-0.0887	NOP10
0.0839	-0.0864	CD58
0.0832	-0.0793	SETD2
0.0831	-0.0786	GET4
0.0826	-0.0813	PIK3R5
0.0822	-0.0837	LINC01504
0.082	-0.0776	AGAP2
0.0816	-0.081	HLA-DMA
0.0816	-0.0841	HOOK3
0.0811	-0.0809	WHAMM
0.0809	-0.0823	MRFAP1L1
0.0807	-0.081	PARP8
0.0802	-0.0742	MGAM
0.0796	-0.0768	RELA
0.0796	-0.0789	TMEM185B
0.0795	-0.0753	YIPF4
0.0793	-0.0705	GAN
0.079	-0.0851	NDUFS6
0.0784	-0.0713	ZFAND4
0.0782	-0.0769	PTOV1
0.0769	-0.083	EGR1
0.0767	-0.0689	IGFBP7
0.0765	-0.0769	EIF4G1
0.0764	-0.0745	ICAM1
0.0763	-0.0723	PTK2B
0.0763	-0.0743	TKT
0.0756	-0.0785	ARAP1
0.0754	-0.0752	SLC27A3
0.0747	-0.0718	SEC24A
0.0746	-0.0737	TESK2
0.0746	-0.0741	RNF111
0.0728	-0.0695	C11orf71
0.0723	-0.0684	ASH1L-AS1
0.0723	-0.0751	TAF1B
0.072	-0.0656	SHOC2
0.072	-0.0789	KIAA1024L
0.0716	-0.0667	CSNK1G2
0.0715	-0.0727	CDC14A
0.0708	-0.0718	ABCF1
0.0708	-0.0727	PDK3
0.0707	-0.0754	PSME1
0.0699	-0.0692	SLC9B2
0.0696	-0.0688	TCIRG1
0.0692	-0.0667	GUSB
0.069	-0.0703	TMEM129
0.0687	-0.0608	RUFY1
0.0682	-0.0697	ENO2
0.0682	-0.0675	UMAD1
0.068	-0.063	MIR4435-2HG
0.0679	-0.0671	SHISA5
0.0678	-0.0632	IRF1
0.067	-0.0717	GOLGA2
0.0667	-0.0727	GTF2B
0.0666	-0.0706	AP2A1
0.0665	-0.0604	KTI12
0.0663	-0.0667	USP21
0.066	-0.0622	CTDP1
0.0659	-0.0597	ARHGDIA
0.0658	-0.0627	PLEC
0.0655	-0.065	WDR36
0.0654	-0.0618	RAP1GDS1
0.0653	-0.0633	TAF11
0.065	-0.0654	DHX29
0.0648	-0.0586	LY6E
0.0646	-0.063	HAUS3
0.0645	-0.0582	BNIP3L
0.0639	-0.0597	FAM177A1
0.0638	-0.0607	CYP2R1
0.0638	-0.0651	ARPC4-TTLL3
0.0637	-0.0654	SSBP4
0.0633	-0.0654	ADIPOR1
0.0632	-0.064	MFSD14A
0.0627	-0.0624	NUCB1
0.0626	-0.0595	HIVEP3
0.0625	-0.0633	KLHL24
0.0615	-0.0599	BSCL2
0.0613	-0.0642	ILVBL
0.0608	-0.0625	C2CD3
0.0606	-0.0522	SP3
0.0606	-0.0597	CD5
0.0601	-0.0597	CD83
0.06	-0.0573	MVD
0.0599	-0.0582	CHPF2
0.0594	-0.062	ID1
0.0589	-0.0594	SGK494
0.0589	-0.0646	PRR5
0.0589	-0.0565	HNRNPA0
0.0586	-0.0586	TAX1BP1
0.0585	-0.0494	LSM12
0.0572	-0.0544	GARS
0.0567	-0.05	BCL2L13
0.0565	-0.0579	PGM1
0.0565	-0.0544	MPI
0.0556	-0.0577	SUMO2
0.0544	-0.0581	DHRSX
0.0541	-0.0547	BCAP29
0.054	-0.0501	ZNF398
0.054	-0.0473	FYTTD1
0.0534	-0.0544	GOLGA7
0.0531	-0.053	CALCOCO2
0.0529	-0.0474	UBXN7
0.0525	-0.0539	UQCRFS1
0.0522	-0.0524	UBLCP1
0.0522	-0.0475	USP20
0.0521	-0.0541	SDHA
0.0521	-0.0531	TWF2
0.0512	-0.0535	OXA1L
0.051	-0.0485	TNFRSF14
0.0509	-0.051	ZNF362
0.0508	-0.0511	DHX30
0.0508	-0.0499	BCO2
0.0504	-0.0501	NUP50
0.0501	-0.0466	SP140L
0.0501	-0.0507	FIS1
0.0499	-0.0523	STK26
0.0499	-0.0462	FCHSD2
0.0498	-0.0506	FGD3
0.0497	-0.0517	CD8B
0.0496	-0.0454	ANP32A
0.0492	-0.0477	LPCAT1
0.0492	-0.0507	SPRTN
0.0489	-0.0509	EIF2AK3
0.0489	-0.0435	HSPA8
0.0487	-0.0445	IL7R
0.0486	-0.0531	KANSL2
0.0485	-0.0491	MIF-AS1
0.0485	-0.0494	PFKP
0.0484	-0.0444	CMTM3
0.0472	-0.0446	LRRC69
0.0471	-0.0481	TMEM39A
0.0469	-0.0436	TMPO
0.0463	-0.045	PCGF5
0.0459	-0.039	ZC3H15
0.0455	-0.0403	CYP2F1
0.0453	-0.051	GLRX
0.0447	-0.0402	GDI1
0.0445	-0.0423	KIF3B
0.0441	-0.048	CYP3A5
0.0438	-0.0435	WDR82
0.0435	-0.0441	TRIM72
0.0435	-0.0407	GNL2
0.0429	-0.0411	HSPD1
0.0429	-0.0429	RNF139
0.0425	-0.0442	VAMP4
0.0422	-0.0411	HOTAIRM1
0.0422	-0.0407	ARMC8
0.0413	-0.037	ANKRD36C
0.0412	-0.0417	VAMP3
0.0412	-0.0426	PECAM1
0.041	-0.0388	POFUT2
0.041	-0.0355	CDK10
0.0408	-0.0418	PREB
0.0403	-0.0362	IFRD1
0.0401	-0.0366	HIST1H2AL
0.04	-0.0408	SLC38A2
0.0399	-0.0377	GAS7
0.0399	-0.0446	TBCC
0.0398	-0.0391	UBE2E3
0.0397	-0.0352	MDC1
0.0396	-0.044	GDAP2
0.0395	-0.0443	SMARCC1
0.0394	-0.0414	HMG20A
0.0394	-0.0391	GRINA
0.0388	-0.0411	CNBP
0.0381	-0.038	CCT7
0.0378	-0.0406	ZNF721
0.0377	-0.0388	AIFM1
0.0376	-0.0317	UBXN2A
0.0372	-0.0327	ZNF592
0.037	-0.0347	EIF1AY
0.0368	-0.0438	PEAK1
0.0367	-0.0409	ARHGEF18
0.0365	-0.0399	TMBIM1
0.0361	-0.0335	HACD2
0.0355	-0.034	SPRYD3
0.0355	-0.0388	CBLB
0.0354	-0.0371	SH2B1
0.0354	-0.041	THOC2
0.0353	-0.0298	CFAP97
0.0343	-0.0358	MGRN1
0.0341	-0.0354	AMBRA1
0.034	-0.0312	ARRB2
0.0334	-0.034	KRBOX4
0.0329	-0.0284	HMOX1
0.0329	-0.0291	SH3GLB1
0.0328	-0.0304	SMARCA5-AS1
0.0318	-0.028	AKIRIN1
0.0312	-0.0296	GNPAT
0.0307	-0.038	UPP1
0.0304	-0.0266	MBNL3
0.0302	-0.0325	AC009495.3
0.0301	-0.0337	ABHD18
0.03	-0.026	PYGO2
0.0297	-0.0262	ZNF574
0.0295	-0.0267	UNC119
0.0291	-0.0271	TFDP1
0.0291	-0.026	CYP46A1
0.0286	-0.0275	SAAL1
0.0286	-0.0261	CORO1B
0.0276	-0.0258	S100A10
0.0273	-0.0218	H2AFZ
0.0272	-0.0259	SACS
0.0266	-0.0264	CA5A
0.0263	-0.0314	JAKMIP1
0.0263	-0.028	BTN3A1
0.0261	-0.0269	SIN3A
0.0259	-0.0278	BCL2L15
0.0255	-0.0306	HDLBP
0.0252	-0.0228	XPO4
0.0249	-0.0183	CEP57
0.0246	-0.0208	RBBP7
0.0244	-0.023	THUMPD1
0.0244	-0.018	ACAD11
0.0243	-0.016	CYLD
0.0239	-0.0229	FAM76B
0.0235	-0.0208	ARSA
0.0235	-0.0283	LYST
0.0234	-0.0255	DUSP22
0.0231	-0.0227	ANXA11
0.023	-0.0266	DCAF11
0.0229	-0.0125	ULK3
0.0228	-0.0191	BRK1
0.0224	-0.024	DAP
0.0222	-0.0204	ZNF556
0.0221	-0.0285	TTC38
0.0218	-0.0233	PSMD1
0.0216	-0.0215	AKAP8L
0.0216	-0.018	PRH1
0.0209	-0.0266	MAGED1
0.0207	-0.0201	NFXL1
0.0205	-0.0151	TFAM
0.0198	-0.0151	ARF5
0.0197	-0.0217	SAMD3
0.0197	-0.0237	AOAH
0.0197	-0.0191	HDAC7
0.0195	-0.0233	MOB3A
0.0193	-0.0138	SPG21
0.0192	-0.0244	AK1
0.0191	-0.0158	ZHX2
0.0188	-0.0132	DTX2
0.0187	-0.0209	FYCO1
0.0187	-0.0163	ZNF564
0.0187	-0.0182	TIPARP
0.0185	-0.0183	AHCYL2
0.0179	-0.0196	NUMA1
0.0177	-0.0203	ZNF557
0.0172	-0.018	HAVCR2
0.017	-0.0111	ATP8B4
0.0169	-0.0167	MBD1
0.0169	-0.0203	TXNRD1
0.0163	-0.0123	GSS
0.0162	-0.02	C5AR2
0.0162	-0.0146	FAS
0.0161	-0.0161	MGAT5
0.0157	-0.0199	LGALS9C
0.0155	-0.0136	MZF1-AS1
0.0152	-0.0121	RAB37
0.0151	-0.0136	MED15
0.015	-0.0143	ATF5
0.0149	-0.0161	CMTR1
0.0148	-0.0119	TRIM14
0.0145	-0.0123	AFG3L2
0.0136	-0.015	RBM25
0.0135	-0.0103	ASNSD1
0.0129	-0.0115	STAG1
0.0128	-0.0134	GRASP
0.0126	-0.00955	DAZAP2
0.0125	-0.00625	ACAD9
0.0122	-0.014	CDC5L
0.0117	-0.0125	PSTPIP2
0.0113	-0.01	NARF
0.0109	-0.0123	PGAM1
0.0107	-0.0144	WARS2
0.0104	-0.00265	LDOC1
0.00963	-0.0106	SYNRG
0.0095	-0.0123	HIP1R
0.00935	-0.0079	MFSD5
0.0093	-0.0171	KDM1A
0.00908	-0.00431	KRI1
0.00905	-0.0121	UBE2S
0.00858	-0.0141	DCAF17
0.00833	-0.00743	MCCC2
0.0082	-0.01	HGS
0.00796	-0.00819	ETS1
0.00759	-0.00382	ANKRD13A
0.00758	-0.00426	TAPBPL
0.00755	-0.00483	ADIPOR2
0.00745	-0.0026	DYNC1LI1
0.00706	-0.00452	TMLHE
0.0069	-0.00373	GSTK1
0.00659	-0.00629	CNKSR3
0.00654	-0.00283	BBC3
0.00613	-0.00916	NYAP2
0.00518	-0.00492	PIM3
0.00473	-0.00463	FRAT2
0.00467	-0.00698	ARMC6
0.00448	-0.00465	TRAV35
0.0043	0.00249	SLMAP
0.00423	-0.00089	VPS16
0.00419	0.00157	SNAP29
0.00411	-0.00666	RTKN2
0.00348	0.00427	PF4
0.00324	0.000666	SLC12A7
0.0032	-0.0117	ZNF148
0.00287	-0.00255	PRKAR1A
0.0028	-0.00319	FAM110A
0.00279	0.00274	RBMX
0.00233	-0.00274	SPAST
0.00166	0.000163	PDS5A
0.0012	-0.000165	ITPR3
0.000969	-0.00332	MRPS30
0.000916	0.00243	RBM10
0.000876	0.00165	VCPIP1
6.38e-05	0.00329	FBXO6
4.74e-05	-0.00324	AMPH
-3.24e-05	0.00561	FAAP100
-0.000377	5.15e-05	LAPTM5
-0.000414	-0.000799	C5orf22
-0.000468	-0.000662	MYBL1
-0.000545	-0.00306	HELB
-0.000597	-0.00496	COPG1
-0.000749	0.00163	ESCO1
-0.00107	0.000939	PPIP5K2
-0.00113	0.00564	ZNF224
-0.00217	0.000184	TRIP11
-0.00224	0.00804	LINC00092
-0.00233	-0.000599	DNAJC1
-0.00265	-0.000726	GADD45A
-0.00284	0.00764	ANKRD40
-0.00292	0.00242	COL13A1
-0.00333	-0.00151	RGCC
-0.00337	0.0103	STRADA
-0.00371	0.00298	PPM1D
-0.00383	-0.0019	DAZAP1
-0.00411	0.0117	CD6
-0.00468	0.00955	BRD7
-0.00474	0.00703	SFXN1
-0.00487	0.00309	TRMT61B
-0.00487	0.0116	PLCG1
-0.00515	0.00598	CNOT8
-0.00573	0.00521	RAB11FIP5
-0.00578	0.0102	ARHGAP25
-0.00619	0.00937	ELOVL5
-0.00624	0.00444	EFCAB2
-0.00638	0.0113	ASAH1
-0.00677	0.00517	TRRAP
-0.00683	0.0066	JMJD7
-0.00683	0.00165	TOP1
-0.00696	0.0132	RASAL3
-0.00727	0.00803	ZNF100
-0.00727	0.00782	BRD8
-0.00756	0.000759	ARFGEF1
-0.00777	0.00739	PHLDB3
-0.00815	0.00487	CHCHD3
-0.00833	0.0105	GTF2H4
-0.00848	0.00738	ABHD5
-0.00923	0.00945	DCAF5
-0.00983	0.011	HPS6
-0.0108	0.0119	ELF2
-0.0108	0.00782	DCAF8
-0.0112	0.0088	PHF20
-0.0115	0.0095	NME3
-0.0117	0.0126	DUSP5
-0.0118	0.0142	ASL
-0.0119	0.00978	TIAL1
-0.012	0.0041	RAB14
-0.0121	0.0141	RIOK3
-0.0122	0.00661	LYSMD2
-0.0123	0.00854	LAG3
-0.0124	0.00833	MOB4
-0.0124	0.0145	SCAF1
-0.0126	0.0131	PRMT3
-0.0127	0.00991	VPS13A
-0.0129	0.00778	UFL1
-0.013	0.0135	BAG3
-0.0133	0.0108	SPG7
-0.0133	0.00847	URI1
-0.0133	0.0153	ACD
-0.0135	0.0147	EPOR
-0.0139	0.00894	SLC25A39
-0.0141	0.0151	KIZ
-0.0144	0.0136	DPYD
-0.0151	0.0167	PKM
-0.0153	0.00915	SH2D2A
-0.0157	0.0137	OGFR
-0.0158	0.0167	NRDC
-0.0158	0.0168	DNAJA1
-0.0162	0.0115	ATG13
-0.017	0.0124	DDA1
-0.017	0.0147	PTPN1
-0.017	0.0161	TBCK
-0.0176	0.0164	PPP3R1
-0.0183	0.0154	CCDC85C
-0.0185	0.0155	PTPMT1
-0.0194	0.0217	VPS13D
-0.0194	0.018	LIN54
-0.0197	0.0137	GBA
-0.0198	0.0177	GBF1
-0.0205	0.0181	CARD11
-0.0205	0.0259	SREK1
-0.0209	0.0165	OLA1
-0.0209	0.0198	LRRC59
-0.0209	0.0211	WAPL
-0.0209	0.0238	KREMEN1
-0.021	0.0208	ST3GAL4
-0.0214	0.021	PIK3R4
-0.0214	0.0257	FUT10
-0.0215	0.0257	SPTBN1
-0.0226	0.0148	BRWD1
-0.0228	0.0359	PTGES3
-0.0229	0.0206	RBM15B
-0.0233	0.0224	OGT
-0.0234	0.0207	HIST2H2AA3
-0.0237	0.0311	EIF5
-0.0242	0.0273	NUB1
-0.0244	0.0241	PSMD9
-0.0244	0.0236	TPGS1
-0.0247	0.0261	RGS1
-0.0248	0.0208	STK25
-0.0248	0.0231	SMCHD1
-0.0253	0.0239	NASP
-0.0256	0.0241	ALG13
-0.0263	0.0262	TRIP12
-0.0265	0.0265	PRKAR1B
-0.0271	0.0216	C5orf24
-0.0271	0.0284	NCLN
-0.0272	0.0324	TUBA4A
-0.0277	0.0273	SPTLC1
-0.0277	0.0212	SEC23IP
-0.028	0.029	NDRG1
-0.0281	0.0308	DONSON
-0.0283	0.0289	ERLEC1
-0.0283	0.0262	ZNF296
-0.0285	0.023	RABGAP1L
-0.0286	0.0249	WDFY1
-0.0286	0.0228	HERPUD2
-0.0288	0.0224	UPF3B
-0.0289	0.0384	NEK1
-0.0291	0.0268	ATP6V0E1
-0.0292	0.0331	DLST
-0.0295	0.0253	EHMT1
-0.0296	0.0242	SP140
-0.0297	0.0264	ZFY
-0.03	0.0307	ANKRA2
-0.0302	0.0322	GAB3
-0.0303	0.0285	PPP2R5B
-0.0309	0.0305	CBLL1
-0.0312	0.0346	HSH2D
-0.0314	0.0339	ANO8
-0.0314	0.0271	DCP1A
-0.0316	0.0327	HMGN2
-0.032	0.033	PRPF3
-0.032	0.0254	PANK2
-0.0323	0.0335	PPP1R12A
-0.0324	0.0295	TRNT1
-0.0326	0.0343	LYAR
-0.0328	0.0303	KIF5B
-0.033	0.0353	PAM
-0.033	0.0336	CEP120
-0.0337	0.0345	SEC13
-0.0341	0.0372	NFE2L1
-0.0348	0.037	HES4
-0.0349	0.0332	DNAAF1
-0.0358	0.0288	GINM1
-0.0358	0.0343	RGPD8
-0.0359	0.0363	SLC39A7
-0.036	0.0372	SGSH
-0.0364	0.0299	TMEM263
-0.0364	0.0337	SPIN1
-0.0364	0.0368	DNAJC27
-0.037	0.031	LYSMD3
-0.0371	0.0343	CYB561D2
-0.0372	0.0367	LSS
-0.0373	0.0281	SEC14L1
-0.0375	0.037	TTC21B
-0.0375	0.0374	SMYD3
-0.0377	0.0373	JTB
-0.0378	0.0386	USP19
-0.0383	0.0359	KDM5B
-0.0384	0.0377	GPR25
-0.0385	0.0296	SLC25A38
-0.0385	0.0369	COX10
-0.0388	0.0338	EXOSC10
-0.0389	0.0408	UBL5
-0.0392	0.0431	PIAS4
-0.0392	0.0374	SKIV2L
-0.0397	0.0362	HNRNPDL
-0.0397	0.0376	HPS1
-0.0398	0.0431	IL2RG
-0.0399	0.0409	FNTA
-0.04	0.0384	NCALD
-0.0405	0.031	EPS15L1
-0.0405	0.0397	TICAM1
-0.0407	0.0397	OPTN
-0.0407	0.0393	LMF1
-0.0407	0.0491	CSNK2B
-0.0409	0.0447	ELOVL1
-0.041	0.0362	WDR48
-0.0412	0.0435	PHYKPL
-0.0413	0.0373	CTPS1
-0.0414	0.0362	NCAM1
-0.0418	0.0391	AFAP1
-0.0418	0.0437	NOP58
-0.042	0.0405	FBXL12
-0.0423	0.0449	STX12
-0.0423	0.0482	PCGF1
-0.0428	0.0458	PANX1
-0.0429	0.0428	IRF2BP2
-0.043	0.0457	CHURC1
-0.0439	0.0486	SYNGR2
-0.0442	0.0406	PARP10
-0.0443	0.0479	FAF1
-0.0451	0.043	UBA1
-0.0455	0.0438	TCEA1
-0.0455	0.0432	TSR2
-0.0457	0.0483	AFTPH
-0.0458	0.0433	PGAP3
-0.0458	0.0453	GTF2E2
-0.0463	0.0473	H2AFV
-0.0467	0.0548	ADSS
-0.0469	0.048	DOCK10
-0.0472	0.0478	NDRG3
-0.0474	0.0496	KIF13B
-0.0479	0.0442	TMX4
-0.0481	0.0491	AC007952.4
-0.0481	0.0454	RBBP6
-0.0483	0.0447	TMEM191C
-0.0484	0.0488	PRKCQ
-0.0485	0.0529	ANXA5
-0.0486	0.0453	UHMK1
-0.0486	0.0515	MUC12
-0.0491	0.0525	ULK4
-0.0492	0.0486	VPS13C
-0.0493	0.0496	DRG2
-0.0495	0.0465	PRMT1
-0.05	0.0516	ARL13B
-0.05	0.0506	UGCG
-0.05	0.0495	STAMBP
-0.0504	0.0492	TRGV8
-0.051	0.0507	RP9
-0.051	0.0525	ADAM15
-0.0511	0.0462	STAT5A
-0.0516	0.0549	UBE2M
-0.0517	0.0499	TBCCD1
-0.0518	0.0523	PNMA1
-0.0522	0.0464	ARHGEF26
-0.0523	0.0564	ZNF683
-0.0524	0.0527	PRMT5-AS1
-0.0524	0.0479	KIF9
-0.0525	0.0524	RBM4
-0.0526	0.0535	RBM18
-0.0533	0.0458	ELF4
-0.0533	0.055	CMTM6
-0.0537	0.054	IL32
-0.0537	0.0603	SRRT
-0.0539	0.056	NUDT18
-0.0544	0.0526	RBM3
-0.0549	0.0565	LSM3
-0.055	0.0575	MXI1
-0.0552	0.0501	ALG9
-0.0553	0.0539	BTAF1
-0.0554	0.0557	PPP1R15B
-0.056	0.0553	LRRC43
-0.0561	0.0532	OXNAD1
-0.0563	0.0613	IL10RA
-0.0565	0.0628	BTN3A3
-0.0566	0.052	MYNN
-0.0567	0.0568	XPA
-0.0568	0.0559	ATP11B
-0.0575	0.0592	NDUFB7
-0.0578	0.0606	SUPT20H
-0.0578	0.0614	G3BP2
-0.0582	0.0589	TBX21
-0.0584	0.0611	RBM22
-0.0588	0.0618	GAPVD1
-0.0591	0.0506	ANXA2R
-0.0597	0.0619	ZNF654
-0.0597	0.0585	GTF2H3
-0.0603	0.0526	DDX59
-0.061	0.0604	DPEP2
-0.0613	0.0586	DPM1
-0.0613	0.0593	CERCAM
-0.0614	0.0607	KRR1
-0.0615	0.0652	DDX58
-0.0618	0.0653	ARHGAP17
-0.0621	0.0658	MAP4K2
-0.0622	0.0585	LRRC70
-0.0625	0.0589	GCH1
-0.0629	0.0568	WDR43
-0.0631	0.0576	PUF60
-0.0632	0.0635	PDHA1
-0.0633	0.0677	RAB9A
-0.0636	0.0647	BIRC6
-0.0641	0.0667	PWP2
-0.0642	0.061	IRF7
-0.0644	0.0677	PSIP1
-0.0645	0.0638	NDUFA3
-0.0645	0.0672	ARMC10
-0.0649	0.066	ZFYVE27
-0.0649	0.0641	APTX
-0.0651	0.0601	CEP95
-0.0654	0.0607	AL645728.1
-0.0658	0.0628	CLDND1
-0.0661	0.0636	RRP1B
-0.0664	0.0629	MCL1
-0.0668	0.0698	TIMM23B
-0.0669	0.0679	ADGRG1
-0.0675	0.0702	FDX1
-0.0676	0.0719	ARL6IP4
-0.0677	0.0654	PAPSS1
-0.0677	0.0677	LEMD2
-0.0679	0.0656	RASA1
-0.0679	0.0706	ZDHHC3
-0.0683	0.0693	TMEM135
-0.0687	0.0662	SMPD1
-0.0691	0.0667	ACLY
-0.0692	0.0685	DNLZ
-0.0692	0.0727	R3HDM4
-0.0693	0.0687	APMAP
-0.0693	0.0637	BNIP1
-0.0706	0.0694	AP3D1
-0.071	0.0806	USP3
-0.0715	0.0673	RPAP3
-0.0715	0.0685	WFDC1
-0.0718	0.0668	HNRNPL
-0.0721	0.0694	GLMP
-0.0722	0.0711	ST3GAL1
-0.0725	0.0716	GATA3
-0.0726	0.0764	CPSF7
-0.0727	0.0684	MAP1S
-0.0728	0.0803	TRABD
-0.0729	0.0724	CXorf57
-0.0733	0.0701	TUBGCP2
-0.0736	0.0725	SPCS3
-0.0736	0.0728	TFIP11
-0.0736	0.0688	TRPC4AP
-0.0737	0.0794	LRRC23
-0.0738	0.0768	ITGAL
-0.0744	0.0733	SPPL2A
-0.0744	0.0657	YPEL5
-0.0748	0.0833	HMGN1
-0.0748	0.0747	VIPR2
-0.0749	0.0711	SYNJ2
-0.0751	0.0786	BZW1
-0.0754	0.0721	PPP1R21
-0.0756	0.0768	NBN
-0.0758	0.0801	MCM3AP
-0.0762	0.0741	PML
-0.0771	0.0702	ADH5
-0.0771	0.0814	FAM122C
-0.0774	0.0787	CXCR4
-0.0775	0.0749	DLGAP4
-0.0777	0.0829	TP53BP2
-0.078	0.0747	FRMD8
-0.0782	0.0809	CHKB
-0.0783	0.0719	TBCD
-0.0783	0.0771	ACSL4
-0.0784	0.0723	AL592183.1
-0.0784	0.0742	SHARPIN
-0.0787	0.0748	IDS
-0.0789	0.0843	SMARCE1
-0.0791	0.0748	DNAJC27-AS1
-0.0793	0.0803	TOB1
-0.0794	0.0834	H2AFX
-0.0797	0.0778	FTX
-0.08	0.0835	POLD2
-0.0801	0.0815	XPC
-0.0801	0.0804	RNF187
-0.0811	0.079	OS9
-0.0813	0.0794	NADSYN1
-0.0813	0.0808	MAT2B
-0.0815	0.0826	WWOX
-0.0817	0.0791	RRAGB
-0.0818	0.0779	DESI2
-0.0819	0.0785	ARL8B
-0.0821	0.0781	NEAT1
-0.0821	0.0799	PLAA
-0.0823	0.0779	RIN3
-0.0829	0.0788	NSMAF
-0.083	0.0825	RAB2A
-0.083	0.0837	SUCLA2
-0.083	0.0756	SCYL2
-0.083	0.0816	CARNMT1
-0.0834	0.0838	DHX35
-0.0835	0.0791	FAM120B
-0.0839	0.0838	OR4D1
-0.0848	0.087	UBAP2L
-0.0857	0.0853	ASB8
-0.0859	0.0861	TPP1
-0.0859	0.0828	NEK7
-0.0861	0.0859	IQCB1
-0.0862	0.0843	MEPCE
-0.0864	0.0878	UBAC1
-0.0865	0.0867	CRY1
-0.0867	0.0923	ZDHHC17
-0.0868	0.0886	PHLDB2
-0.0871	0.0838	TOLLIP
-0.0872	0.0887	CSRP1
-0.0873	0.0878	AIMP2
-0.0876	0.0916	PLIN2
-0.0884	0.094	PHB2
-0.0887	0.0885	FAM96A
-0.089	0.0876	PRPS1
-0.0894	0.0848	CANX
-0.0894	0.0868	RABGGTA
-0.0897	0.0872	AP3S2
-0.0899	0.0922	SUPV3L1
-0.0902	0.0923	TROVE2
-0.0904	0.0878	PAM16
-0.0905	0.0888	DYM
-0.0907	0.0924	POLDIP3
-0.0908	0.0902	FOSL2
-0.0908	0.0866	KIAA1191
-0.091	0.091	DHX32
-0.0912	0.0897	FXR1
-0.0915	0.0907	TRGV4
-0.0915	0.0897	RASSF4
-0.092	0.0937	IFITM2
-0.092	0.0921	NCDN
-0.0921	0.0912	FBXL5
-0.0923	0.0895	IL12RB2
-0.0924	0.0907	DIAPH2
-0.0924	0.0914	SDR39U1
-0.0925	0.0882	MAX
-0.0929	0.0901	TMED5
-0.0932	0.0918	SPAG9
-0.0932	0.0979	ATF2
-0.0932	0.0916	BRD1
-0.0933	0.0962	MMGT1
-0.0933	0.0963	EIF4EBP3
-0.0933	0.0885	SEC31A
-0.0938	0.0967	TOPBP1
-0.0938	0.0888	ATF3
-0.0939	0.0993	GSC
-0.094	0.0914	HAUS2
-0.0945	0.0991	STAT6
-0.0945	0.0947	KIR3DL2
-0.0948	0.0955	SPSB3
-0.0949	0.0918	SFMBT1
-0.0953	0.0975	C12orf54
-0.0957	0.0964	CDK6
-0.0957	0.0934	PTPN9
-0.0959	0.0996	G2E3
-0.096	0.0896	VILL
-0.096	0.0926	TIPRL
-0.0962	0.0979	MICAL1
-0.0963	0.0944	MDP1
-0.0965	0.0919	ATAD1
-0.0968	0.0948	SMCR5
-0.0974	0.0934	ZZEF1
-0.0976	0.0954	ZNF821
-0.098	0.101	ZNF195
-0.0986	0.101	THOP1
-0.0987	0.0962	RGS14
-0.0987	0.095	CCS
-0.0987	0.0963	PSPC1
-0.0989	0.1	DIAPH1
-0.0991	0.103	NUCB2
-0.0991	0.0978	PIGC
-0.0998	0.103	TRBC2
-0.0999	0.0945	ARHGEF1
-0.0999	0.0973	ARID1B
-0.0999	0.0957	IKZF2
-0.1	0.099	SLC15A4
-0.101	0.101	TCEAL3
-0.101	0.0942	DDX60
-0.101	0.0989	IL21R
-0.101	0.098	TMEM43
-0.102	0.0927	HPS5
-0.102	0.0983	MORC3
-0.102	0.0989	TNPO3
-0.102	0.0975	PFN1
-0.102	0.0967	GPATCH3
-0.103	0.105	NPFFR1
-0.103	0.107	DUSP12
-0.103	0.0982	SENP1
-0.104	0.0914	RBBP4
-0.104	0.101	ILF3
-0.104	0.1	PIK3AP1
-0.104	0.102	CSNK2A1
-0.104	0.0993	CIDEB
-0.104	0.105	SMARCC2
-0.104	0.0923	DDX39B
-0.104	0.0993	MFSD6
-0.105	0.103	GTF2A1
-0.105	0.111	ERC1
-0.105	0.108	SLC35F5
-0.105	0.102	BCCIP
-0.105	0.108	RABGAP1
-0.105	0.105	DPP9
-0.105	0.104	SBDS
-0.105	0.106	FASTKD2
-0.106	0.104	KANTR
-0.106	0.102	PRKX
-0.106	0.101	KXD1
-0.106	0.102	EIF2AK2
-0.107	0.104	CHST11
-0.107	0.106	HSPA1B
-0.107	0.099	CGGBP1
-0.107	0.105	PORCN
-0.107	0.104	GLS
-0.107	0.106	ZNF593
-0.108	0.116	NT5C3A
-0.108	0.11	ZFP36L2
-0.108	0.106	SLC9A3
-0.108	0.106	SEL1L
-0.108	0.102	ERCC6L2
-0.109	0.106	C8orf82
-0.109	0.107	SREBF2
-0.109	0.106	HIST1H2AG
-0.109	0.114	AP1M1
-0.11	0.113	NFIL3
-0.111	0.112	PRKCH
-0.111	0.108	SYT5
-0.111	0.11	PITPNM2
-0.111	0.108	RDH14
-0.112	0.109	SLF1
-0.112	0.114	ATP6AP1
-0.112	0.11	DMTF1
-0.112	0.114	TSC22D4
-0.112	0.109	DDX54
-0.112	0.11	RRM1
-0.113	0.111	HMGB1
-0.113	0.115	CCDC6
-0.113	0.108	TRIM8
-0.113	0.111	WBP2
-0.114	0.116	ATP8A1
-0.114	0.112	RASGEF1B
-0.114	0.11	NCL
-0.114	0.111	FMNL1
-0.114	0.116	HNRNPLL
-0.114	0.111	IGLV2-11
-0.115	0.118	FOXN2
-0.115	0.114	BAG6
-0.115	0.118	MLST8
-0.115	0.112	NFKBID
-0.116	0.114	MKNK2
-0.116	0.111	RNH1
-0.116	0.117	KCNAB2
-0.117	0.119	VAMP2
-0.117	0.117	RIPK1
-0.117	0.114	ARF1
-0.117	0.11	ANKRD49
-0.117	0.112	ARMCX3
-0.117	0.119	SMG5
-0.117	0.109	CS
-0.117	0.109	PHC3
-0.118	0.113	LMTK2
-0.118	0.118	UCKL1
-0.118	0.119	MIATNB
-0.118	0.113	SNHG12
-0.118	0.12	PCED1A
-0.119	0.113	RALGAPB
-0.119	0.121	TMEM62
-0.119	0.116	TAMM41
-0.119	0.121	PLCG2
-0.119	0.117	ZNF43
-0.121	0.116	BICD2
-0.121	0.119	ENOX2
-0.121	0.122	TMEM175
-0.121	0.118	TRBV3-1
-0.121	0.121	CHP1
-0.121	0.121	ISCA1
-0.121	0.114	NR2C1
-0.122	0.121	PWP1
-0.122	0.114	CERK
-0.122	0.12	YBX1
-0.123	0.128	STRN
-0.123	0.123	NXT1
-0.123	0.12	COMMD2
-0.123	0.129	N4BP2L2
-0.123	0.117	TNIP2
-0.123	0.121	DHX9
-0.123	0.118	KLRK1
-0.123	0.126	COQ7
-0.123	0.125	KRIT1
-0.123	0.118	SPECC1L
-0.123	0.124	PROK2
-0.123	0.118	LINC00861
-0.124	0.123	CHRFAM7A
-0.124	0.119	PNP
-0.124	0.116	CHMP4B
-0.124	0.125	ATXN7L3B
-0.125	0.12	IPO8
-0.125	0.126	LATS2
-0.125	0.123	SURF4
-0.125	0.13	CWC25
-0.125	0.125	HNRNPU
-0.125	0.124	MEA1
-0.125	0.127	ATR
-0.125	0.122	RPTOR
-0.126	0.129	MRPL12
-0.126	0.122	NELFA
-0.126	0.126	HELQ
-0.126	0.13	SLC44A2
-0.126	0.119	NR1D1
-0.126	0.125	PMPCB
-0.127	0.129	STAM
-0.127	0.119	POLB
-0.127	0.123	ISYNA1
-0.127	0.118	ARL5B
-0.127	0.126	DNAAF2
-0.127	0.126	GALC
-0.128	0.126	TLE4
-0.128	0.12	KDM6B
-0.128	0.131	PABPC1
-0.128	0.13	ZFAND2A
-0.128	0.121	ETV6
-0.128	0.125	RRN3
-0.128	0.137	CD52
-0.129	0.129	TARSL2
-0.129	0.124	PPP1R10
-0.129	0.128	RAB8B
-0.129	0.132	IGSF8
-0.13	0.132	KIAA1143
-0.13	0.132	SPTY2D1
-0.13	0.129	LTBP4
-0.13	0.13	SCAMP3
-0.13	0.134	ZNF266
-0.13	0.13	SGMS1
-0.13	0.123	KMT2E
-0.131	0.128	ATXN10
-0.131	0.133	SOCS3
-0.131	0.131	HIST1H2BK
-0.131	0.134	DGKD
-0.131	0.127	XRCC1
-0.131	0.12	CDK12
-0.131	0.129	CLIC1
-0.131	0.128	GRB2
-0.132	0.124	GPR89B
-0.132	0.13	CTCF
-0.132	0.129	PDE4B
-0.133	0.13	C15orf61
-0.133	0.13	NIPBL
-0.133	0.127	XAF1
-0.134	0.13	COPS8
-0.134	0.129	USP13
-0.134	0.133	AATF
-0.134	0.133	SPI1
-0.135	0.13	NAMPT
-0.135	0.131	TARBP2
-0.136	0.132	SLC25A46
-0.136	0.132	KIR3DX1
-0.136	0.133	RSRP1
-0.137	0.13	CDKAL1
-0.137	0.138	IWS1
-0.137	0.133	MRPS2
-0.137	0.132	DCXR
-0.137	0.132	CCNB1IP1
-0.137	0.133	LAMP1
-0.137	0.134	TPST2
-0.137	0.132	PRKAB1
-0.138	0.138	SCAF8
-0.138	0.142	B4GALT4
-0.138	0.14	TTC13
[truncated: 1,807 more rows]
