# Supplementary material for: Linking COVID-19 to Neurodegeneration: A Single-Cell Deep Learning Study of PBMCs in Multiple Sclerosis and Alzheimer’s Disease
Source: Research Square preprint supplement (doi:10.21203/rs.3.rs-7342199/v1), 2025-10-08
Supplement: Supplementary file 9 [file fca46a4b5689cc05fe2cb718.xlsx]

## Sheet: Sheet1
Table8. sorted_data_T_MS
Class0	Class1	gene
0.0243	-0.0236	TMSB4X
0.012	-0.0117	NBEAL1
0.00986	-0.0091	TRAC
0.00792	-0.00662	NHSL2
0.00722	-0.00683	EIF3E
0.00705	-0.00675	UBA52
0.00628	-0.00632	KLRB1
0.0061	-0.00653	TIPIN
0.00588	-0.00503	HBB
0.00587	-0.00629	ATXN8OS
0.00586	-0.00413	MZT2B
0.0056	-0.00424	C1orf56
0.0055	-0.00485	NDUFA11
0.00546	-0.00545	MALAT1
0.00536	-0.00521	TRBC1
0.00525	-0.00478	ZNF90
0.00508	-0.00359	ARFGAP3
0.00484	-0.0039	LSG1
0.00482	-0.00421	EBNA1BP2
0.00455	-0.00367	VAMP2
0.00454	-0.00273	BIRC3
0.00447	-0.00427	B2M
0.0044	-0.00384	NACA2
0.00439	-0.0045	C6orf48
0.00437	-0.0037	MYL12A
0.00436	-0.00286	SNAI3
0.00436	-0.00432	UQCRB
0.0042	-0.00366	HFE
0.00411	-0.00322	NFAM1
0.00411	-0.00341	CNPY2
0.00408	-0.00265	AC005480.1
0.00404	-0.0033	MPV17L
0.00404	-0.0036	ESD
0.00403	-0.00253	MARVELD3
0.00403	-0.00368	BLOC1S1
0.00401	-0.00207	PSPH
0.00401	-0.0035	UBB
0.00399	-0.00422	TRBC2
0.00399	-0.00262	NOP14
0.00399	-0.00384	TXNRD1
0.00393	-0.00293	GPR85
0.00391	-0.00352	PABPC3
0.0039	-0.00344	LTB4R
0.00379	-0.00353	ATXN7
0.00376	-0.00266	CHMP4A
0.00375	-0.00326	PHB
0.00374	-0.00342	GPM6A
0.00373	-0.00374	MYC
0.00369	-0.00313	GTF2H5
0.00367	-0.00313	POLR2J3
0.00367	-0.00396	B3GAT2
0.00366	-0.00326	TIGD7
0.00365	-0.00224	PPM1B
0.00363	-0.00368	WDR31
0.00361	-0.00242	NDUFA4
0.00361	-0.00251	TNFAIP8L2
0.00361	-0.00329	FADS6
0.00356	-0.00316	AC245100.1
0.00354	-0.00323	FDXACB1
0.00352	-0.00199	DCAF15
0.00352	-0.00324	FMO5
0.00349	-0.00254	MAP1LC3B2
0.00348	-0.00344	ATG10
0.00347	-0.0026	CYP3A5
0.00346	-0.00262	PARL
0.00342	-0.00239	HBA1
0.00342	-0.00158	MKNK2
0.00342	-0.00245	TRGC1
0.0034	-0.00294	RBM43
0.00338	-0.00243	SLC26A2
0.00336	-0.00198	MS4A10
0.00336	-0.00346	HTRA2
0.00335	-0.00304	CLEC2D
0.00334	-0.00294	SYNJ2BP
0.00333	-0.00307	APOPT1
0.0033	-0.00292	TSNAX
0.00329	-0.00252	GLRX2
0.00328	-0.00284	SNF8
0.00325	-0.00308	PIP4K2A
0.00324	-0.0025	OXLD1
0.00323	-0.00263	SCRG1
0.00323	-0.00337	SMARCD1
0.00323	-0.00217	DPP4
0.00322	-0.00206	GABPB1-AS1
0.00321	-0.0038	NPHP4
0.00321	-0.00195	COMMD3
0.0032	-0.00193	IGHA1
0.00319	-0.00315	GJC1
0.00318	-0.00215	SCGB3A1
0.00318	-0.00172	POLR2K
0.00317	-0.00231	MRPS14
0.00315	-0.00359	H3F3C
0.00315	-0.00285	ATP6V0E1
0.00314	-0.00289	RFFL
0.00314	-0.0025	POMP
0.00313	-0.00272	SAR1A
0.00313	-0.00241	SLC19A3
0.00312	-0.00243	HIST1H4A
0.00311	-0.00204	MIF-AS1
0.00311	-0.00278	MRPL23
0.0031	-0.0021	SUOX
0.00309	-0.00186	KLF7
0.00308	-0.00181	TADA1
0.00308	-0.00332	LSM3
0.00306	-0.00338	THUMPD3-AS1
0.00306	-0.00245	TRGV3
0.00305	-0.00233	MRPS33
0.00304	-0.00191	SPATA5
0.00303	-0.00179	S1PR3
0.00301	-0.00281	GBP7
0.003	-0.00363	COMMD1
0.003	-0.00203	LMNTD1
0.00299	-0.00254	EIF1AD
0.00299	-0.00184	SPDYE3
0.00298	-0.00271	TRBV13
0.00297	-0.00141	RALGPS1
0.00297	-0.00232	HGH1
0.00296	-0.00239	DACT3
0.00296	-0.00247	TTPAL
0.00295	-0.00233	COMMD6
0.00295	-0.00223	PINX1
0.00294	-0.00288	EIF1AX
0.00294	-0.00296	VKORC1
0.00294	-0.00207	AL592183.1
0.00292	-0.00273	ZNF114
0.00292	-0.0023	NDUFC2
0.00292	-0.0033	PTPRH
0.00291	-0.00258	C10orf95
0.00291	-0.00235	FBXO31
0.00291	-0.00222	NDUFB8
0.00291	-0.00267	AK1
0.0029	-0.00191	NANS
0.0029	-0.00302	MED30
0.00289	-0.00282	C16orf54
0.00287	-0.00192	METAP2
0.00287	-0.00282	GHRL
0.00287	-0.00216	FMN1
0.00287	-0.00355	TMEM120B
0.00286	-0.00177	OPN3
0.00286	-0.00219	MRPL50
0.00286	-0.00231	GPATCH3
0.00285	-0.00266	SERPINB8
0.00284	-0.00255	ZSCAN25
0.00284	-0.00261	TRIM56
0.00284	-0.00276	GPR155
0.00284	-0.00237	CRIPT
0.00284	-0.00158	PCDHA4
0.00277	-0.00241	BCL2L15
0.00277	-0.00307	SLC39A4
0.00277	-0.0015	SLITRK5
0.00277	-0.00246	GABPB1
0.00276	-0.00125	MAP2K1
0.00275	-0.00224	LMOD3
0.00275	-0.00204	SIK3
0.00275	-0.00236	ABCF2
0.00275	-0.00149	FCGR3A
0.00273	-0.00243	PCSK7
0.00272	-0.00325	FRMD8
0.00272	-0.00102	SNRNP200
0.00272	-0.00187	AC005523.2
0.00271	-0.00253	KIAA0586
0.0027	-0.00273	LRP8
0.00269	-0.00209	REXO4
0.00269	-0.00165	SUB1
0.00268	-0.00144	AKAP5
0.00268	-0.0015	EIF4A2
0.00268	-0.00255	C12orf66
0.00267	-0.00272	XIST
0.00267	-0.00264	PRR4
0.00267	-0.00381	GIMAP7
0.00267	-0.00216	EIF5AL1
0.00267	-0.00225	TTC32
0.00267	-0.00221	PTPRK
0.00267	-0.00088	CACNA1C-AS2
0.00266	-0.00247	NICN1
0.00266	-0.00193	SNRPE
0.00266	-0.00324	PTCHD1
0.00266	-0.00218	PPP1R35
0.00266	-0.00242	HSPA14
0.00265	-0.00143	HSH2D
0.00265	-0.00194	CALM2
0.00265	-0.00288	NCOA6
0.00263	-0.0013	ANKRD31
0.00262	-0.00213	EEF2
0.00262	-0.000952	AVIL
0.00261	-0.00232	PRPF40A
0.00261	-0.00271	C14orf119
0.0026	-0.00245	SBNO2
0.00259	-0.00201	XPO7
0.00258	-0.00251	STK11
0.00257	-0.00238	LRRN4CL
0.00256	-0.00105	MAP3K9
0.00255	-0.00162	PRPF4
0.00255	-0.00146	RRS1
0.00254	-0.00312	MYPOP
0.00253	-0.00115	MFSD10
0.00253	-0.00289	GLRX
0.00253	-0.00151	TMTC4
0.00252	-0.00337	C9orf3
0.00252	-0.00174	CORO7
0.00252	-0.00238	PHACTR1
0.00252	-0.00234	TTC9C
0.00251	-0.00251	DICER1
0.0025	-0.00222	SMN1
0.00249	-0.00153	SIDT1-AS1
0.00249	-0.00292	HLA-G
0.00248	-0.00129	DAG1
0.00248	-0.00192	NPM1
0.00247	-0.00217	ACE
0.00247	-0.00308	TRMT112
0.00247	-0.00174	DBN1
0.00246	-0.00232	DOPEY1
0.00246	-0.00217	ILVBL
0.00246	-0.00274	PEX11B
0.00245	-0.00248	B3GALT6
0.00245	-0.00191	C1orf74
0.00244	-0.00152	ATF7IP2
0.00244	-0.0025	HDAC1
0.00244	-0.00276	TMEM60
0.00244	-0.00249	ZNF431
0.00244	-0.00203	PANX1
0.00242	-0.00184	NFKBIB
0.00242	-0.00136	TAF9B
0.00242	-0.00323	COLEC12
0.00241	-0.0013	URB2
0.00241	-0.00255	THUMPD3
0.0024	-0.00278	H2AFZ
0.0024	-0.00146	RETSAT
0.0024	-0.00167	MORC2-AS1
0.00238	-0.00136	DPY30
0.00238	-0.0026	MCM5
0.00238	-0.00213	TAP2
0.00237	-0.00201	PTPN23
0.00237	-0.00142	FBXL2
0.00237	-0.00145	RBFA
0.00236	-0.00148	CLEC11A
0.00235	-0.00174	ZNF852
0.00235	-0.00247	VAMP3
0.00234	-0.00179	SPCS2
0.00234	-0.00207	PSMA4
0.00234	-0.00182	TPCN2
0.00234	-0.00132	EEFSEC
0.00233	-0.00228	MMAB
0.00233	-0.00226	PDS5A
0.00233	-0.00171	RIBC2
0.00233	-0.00168	GLUL
0.00233	-0.00203	ADCY1
0.00232	-0.00166	IPO9-AS1
0.00232	-0.00117	GUCD1
0.00232	-0.0024	RNF43
0.00232	-0.00231	LINC01473
0.00232	-0.00206	ACAT1
0.00231	-0.00254	CCDC97
0.00231	-0.00172	NAP1L1
0.00231	-0.00327	E4F1
0.0023	-0.00155	PSMA2
0.0023	-0.00146	FAM200A
0.00229	-0.00138	TMEM150B
0.00229	-0.00243	GIMAP4
0.00229	-0.00159	ALKBH5
0.00229	-0.00205	ZNF562
0.00229	-0.00265	RDH14
0.00228	-0.00102	AP2A1
0.00228	-0.002	ZNF337-AS1
0.00228	-0.00236	TSC22D1
0.00227	-0.0013	N4BP2L2
0.00227	-0.00194	AP001189.4
0.00226	-0.00149	CCDC61
0.00226	-0.00182	ZCWPW1
0.00226	-0.0031	HBA2
0.00225	-0.00248	SLC39A3
0.00225	-0.00268	TRIM21
0.00225	-0.000993	HES2
0.00225	-0.00165	PIGQ
0.00224	-0.00272	TCEAL8
0.00224	-0.00185	ACOT4
0.00223	-0.00124	HIST1H4D
0.00223	-0.00127	MOB1B
0.00223	-0.00155	MAST4
0.00223	-0.00219	FAM71F2
0.00223	-0.00241	KCNJ3
0.00222	-0.00125	FAM210B
0.00222	-0.00158	STK11IP
0.00222	-0.00263	PDCD10
0.00222	-0.00119	NMI
0.00221	-0.00124	ZBTB48
0.00221	-0.00224	ZNF525
0.00221	-0.00162	IFRD2
0.00221	-0.00137	SNX22
0.0022	-0.00139	PARP3
0.0022	-0.0015	NDUFAF4
0.0022	-0.00192	DENND1B
0.00219	-0.0022	SLC51A
0.00219	-0.000994	BRK1
0.00219	-0.00216	AC005253.2
0.00219	-0.0027	MYO1F
0.00218	-0.00223	GLB1L2
0.00218	-0.00158	ARFGEF1
0.00217	-0.00181	CRKL
0.00216	-0.00169	IFNAR2
0.00215	-0.00133	AKIRIN2
0.00215	-0.00149	GBP1
0.00215	-0.00241	KLRF1
0.00215	-0.00142	PAN3
0.00214	-0.00149	IRF9
0.00214	-0.0022	ABR
0.00214	-0.000981	TRMT61B
0.00213	-0.00201	BOP1
0.00213	-0.00227	ACTR5
0.00213	-0.0011	RHOF
0.00212	-0.00231	FARP2
0.00211	6.77e-05	LYG2
0.00211	-0.00147	MRPS35
0.0021	-0.00108	HNRNPH1
0.0021	-0.0015	GGPS1
0.0021	-0.00153	STAG3
0.0021	-0.00178	CTNNBL1
0.0021	-0.0021	TRDC
0.0021	-0.00154	SETD7
0.00209	-0.00109	SMDT1
0.00209	-0.0019	ZSCAN5A
0.00209	-0.00213	ECI1
0.00209	-0.00174	TRIM23
0.00209	-0.00096	CCDC150
0.00209	-0.00221	TFR2
0.00208	-0.00141	LARP4
0.00208	-0.00321	DHPS
0.00208	-0.00196	PWWP2A
0.00207	-0.00178	THAP11
0.00207	-0.00264	STXBP1
0.00206	-0.00105	ZNF451
0.00206	-0.000845	KLF4
0.00206	-0.00271	DNAJB2
0.00206	-0.000999	DNAJB4
0.00204	-0.00179	NHLRC3
0.00204	-0.0018	CMTM3
0.00204	-0.00203	TTLL7
0.00204	-0.000704	SNRPB2
0.00204	-0.00182	FAM234A
0.00204	-0.00176	UBXN11
0.00204	-0.00147	CENPF
0.00203	-0.00183	FTSJ3
0.00203	-0.00101	FAM69A
0.00203	-0.00108	STK19
0.00203	-0.0017	PAQR8
0.00203	-0.00155	CYB561
0.00203	-0.00259	HMGCL
0.00202	-0.000919	POU5F2
0.00202	-0.00173	HTATIP2
0.00202	-0.00209	GCNT4
0.00201	-0.00141	FAM189B
0.00201	-0.00182	RBM23
0.00201	-0.000232	PMF1
0.002	-0.00125	TMEM191C
0.002	-0.000468	ZFYVE26
0.002	-0.000631	TTYH2
0.002	-0.00161	ULK4
0.002	-0.00183	TOPORS
0.002	-0.00204	TOMM7
0.002	-0.0014	CX3CR1
0.00199	-0.00148	SULF2
0.00199	-0.00143	LSR
0.00199	-0.00022	TLE2
0.00198	-0.00154	A2M-AS1
0.00198	-0.00244	CCDC115
0.00198	-0.00136	GFM2
0.00198	-0.00164	DBNDD2
0.00198	-0.00205	FUT8-AS1
0.00198	-0.00204	CXCL14
0.00198	-0.00155	MEST
0.00197	-0.0021	PSMA3-AS1
0.00196	-0.00129	C6orf62
0.00196	-0.00133	ELK1
0.00196	-0.00144	SERF1A
0.00196	-0.00167	SKP1
0.00196	-0.00134	IFNGR1
0.00196	-0.00228	CBX6
0.00196	-0.0012	LRRCC1
0.00196	-0.00177	SWSAP1
0.00195	-0.00113	NOP10
0.00194	-0.00194	YIPF4
0.00194	-0.002	MPDU1
0.00194	-0.00214	ELAVL1
0.00194	-0.00165	ATF3
0.00193	-0.00128	FAM168B
0.00192	-0.00181	UBE2G1
0.00192	-0.00122	PRPF6
0.00192	-0.00316	CNKSR2
0.00191	-0.00215	YTHDF3-AS1
0.00191	-0.00147	AP3D1
0.00191	-0.00249	UBAP2
0.00191	-0.0017	FAM49B
0.00191	-0.00195	RTTN
0.00191	-0.00113	IYD
0.0019	-0.00209	SUSD4
0.0019	-0.000605	AKT3
0.0019	-0.00178	GLRA3
0.0019	-0.00133	KANSL1
0.0019	-0.00154	TMOD2
0.00189	-0.00156	PI4K2A
0.00189	-0.00169	EPB42
0.00189	-0.00146	WDR73
0.00189	-0.00113	ICA1L
0.00189	-0.00161	ABHD1
0.00189	-0.00105	DCLRE1C
0.00187	-0.00181	SLC20A2
0.00187	-0.00109	TSR1
0.00187	-0.00185	P2RY11
0.00187	-0.00149	MICU1
0.00187	-0.00126	HIST1H2BK
0.00187	3.57e-05	BTN2A2
0.00187	-0.00203	LMBR1L
0.00186	-0.0025	ZNF317
0.00186	-0.00227	CD52
0.00186	-0.00255	ARMC6
0.00186	-0.00148	ITPRIPL1
0.00186	-0.00124	UPB1
0.00186	-0.0016	MRPL21
0.00186	-0.0024	SH2D3C
0.00186	-0.000706	PLAG1
0.00185	-0.00243	AADAT
0.00185	-0.00179	ZNF638
0.00185	-0.0014	KCNQ1
0.00185	-0.00129	GEM
0.00185	-0.00198	EIF3I
0.00184	-0.00149	GLIPR1
0.00184	-0.00173	ULK2
0.00184	-0.00197	GPSM2
0.00184	-0.00125	DRC3
0.00184	-0.00243	OAZ1
0.00184	-0.0021	EIF3G
0.00184	-0.00143	SASH3
0.00183	-0.00113	KCTD19
0.00183	-0.00172	FMO4
0.00182	-0.0011	PRIM2
0.00182	-0.002	COL6A1
0.00182	-0.00039	USP49
0.00182	-0.00259	ANKRD18A
0.00181	-0.00147	SBF2
0.00181	-0.00117	FAM169A
0.00181	-0.00151	INCENP
0.00181	-0.00119	DNM2
0.00181	-0.00178	IL18R1
0.00181	-0.000768	IMMP2L
0.00181	-0.00206	HEATR6
0.00181	-0.00119	HEXIM1
0.0018	-0.00217	NAALADL1
0.0018	-0.0023	BACE1-AS
0.0018	-0.00217	UQCRHL
0.0018	-0.000531	FUT8
0.0018	-0.00145	FBLIM1
0.00179	-0.00122	CDC14B
0.00179	-0.00177	LAMTOR5
0.00179	-0.00201	HLA-DOA
0.00179	-0.00232	BOD1L1
0.00178	-0.00146	PLCH2
0.00178	-0.00135	SNAPC4
0.00178	-0.000484	AUTS2
0.00178	-0.00141	USP7
0.00177	-0.00097	IMPACT
0.00177	-0.00153	ASB16-AS1
0.00177	-0.00122	TRAV23DV6
0.00176	-0.00151	CDC42
0.00176	-0.00161	FAXDC2
0.00176	-0.00224	JAKMIP2
0.00175	-0.00134	PRDM8
0.00175	-0.00194	ID1
0.00175	-0.00163	MRI1
0.00175	-0.00255	APOBEC3C
0.00175	-0.0019	ATP1A2
0.00175	-0.00153	LUADT1
0.00175	-0.000799	PPP2R5D
0.00175	-0.00183	GDF11
0.00174	-0.000834	LTA4H
0.00174	-0.00157	CLDN15
0.00174	-0.000535	ALOX5
0.00174	-0.0022	ITPK1
0.00174	-0.00105	SFT2D3
0.00174	-6.88e-05	BEX5
0.00173	-0.00122	MSANTD3
0.00173	-0.00212	SAP30BP
0.00173	-0.00173	AGFG1
0.00173	-0.000978	XCL2
0.00173	-0.00197	RTP4
0.00173	-0.00195	DOCK9
0.00173	-0.00118	SERF2
0.00172	-0.000969	ZNF649
0.00172	-0.002	ATRN
0.00172	-0.00114	LINC00685
0.00172	-0.00207	IFT22
0.00172	-0.00146	SYNJ2BP-COX16
0.00172	-0.000634	C12orf54
0.00172	-0.0017	PLAC8
0.00171	-0.00161	WDR75
0.00171	-0.000364	TUBGCP2
0.00171	-0.00138	C21orf62
0.00171	-0.00138	WDR86
0.00171	-0.00165	PSMA7
0.00171	-0.0015	RNF11
0.00171	-0.00104	SCAF4
0.00171	-0.000644	CDKAL1
0.00171	-0.00193	KREMEN1
0.00171	-0.00159	NDUFS5
0.0017	-0.00112	TACO1
0.0017	0.000465	GOLGA5
0.0017	-0.00121	PAF1
0.0017	-0.00164	LINC01184
0.0017	-0.00166	PPAN
0.0017	-0.00119	ALDOA
0.00169	-0.00178	GAPVD1
0.00169	-0.00145	MCF2L-AS1
0.00169	-7.84e-05	UBR5
0.00169	-0.00144	SYNPO2L
0.00169	-0.00162	PRPS1
0.00168	-0.00149	PPP1R3D
0.00168	-0.00218	CTSD
0.00168	-0.000929	AMPH
0.00168	-0.00122	ZNF783
0.00168	-0.00221	PRR3
0.00168	-0.00279	PTMA
0.00168	-0.00145	ABHD14A
0.00167	-0.00134	IGHM
0.00167	-0.00129	PEX3
0.00167	-0.00103	RNF168
0.00167	-0.00165	PNP
0.00167	-0.00213	BCO2
0.00167	-0.000655	DUSP18
0.00166	-0.00191	IFITM3
0.00166	-0.00118	MIPEP
0.00166	-0.00184	COMMD7
0.00166	-0.00105	DENND2A
0.00166	-0.00189	ZNF556
0.00165	-0.00215	GUSB
0.00165	-0.000976	PNPLA7
0.00165	-0.000649	ADSS
0.00164	-0.00156	SPNS3
0.00164	-0.00195	GPR171
0.00163	-0.00108	AP1G2
0.00163	-0.00153	RBM17
0.00163	-0.00132	LRRC75A
0.00163	-0.00151	SETD3
0.00162	-0.00115	SNRPG
0.00162	-0.00101	C17orf51
0.00162	-0.000679	ABCD1
0.00162	-0.000643	PPP6R1
0.00162	-0.00085	CDK16
0.00162	-0.000752	TMEM141
0.00162	-0.00126	DCLRE1B
0.00162	-0.0014	KIAA1024L
0.00162	-0.000854	ARPC5
0.00162	0.000223	RAD23B
0.00162	-0.000797	GMFG
0.00162	-0.00163	LINC01355
0.00162	-0.000642	CHP1
0.00162	-0.00072	HAUS3
0.00162	-0.00215	THRA
0.00161	-0.000744	RABL6
0.00161	-0.000661	SH3BP1
0.00161	-0.00205	ID2
0.00161	-0.00113	DLGAP4
0.0016	-0.00165	FBXO41
0.0016	-0.00112	ZNF260
0.0016	-0.00208	GRAMD1B
0.0016	-0.00132	NDUFC1
0.0016	-0.00176	TTC19
0.0016	-0.00114	CHMP3
0.0016	-0.00132	SLC16A5
0.00159	-0.00117	MRM1
0.00159	-0.000821	CASD1
0.00159	-0.00152	POLE3
0.00159	-0.00148	SMAGP
0.00159	-0.00152	ARHGAP10
0.00158	-0.000962	TAF6L
0.00158	-0.00166	C10orf88
0.00158	-0.00229	RNF167
0.00158	-0.0019	MAN2C1
0.00158	-0.000779	EIF3F
0.00157	-0.000583	CAD
0.00156	-0.000832	PLD6
0.00156	-0.00128	HLTF
0.00156	-0.00047	IKBKE
0.00156	-0.00147	PRSS27
0.00156	-0.00218	CBFB
0.00156	-0.00144	EMG1
0.00156	-0.000519	IBTK
0.00156	-0.0013	SORD
0.00155	-0.000452	PIK3R5
0.00155	-0.0015	CATSPER2
0.00155	-0.00198	IL16
0.00155	-0.00154	TMEM70
0.00155	-0.00164	NOTCH3
0.00154	-0.000845	SNX29
0.00154	-0.000714	LONRF1
0.00154	-0.00219	UBE2Z
0.00154	-0.00191	GIMAP1
0.00153	-0.000785	HRASLS2
0.00153	-0.000574	SNRNP48
0.00153	-0.00143	MAD2L1
0.00152	-0.00204	RAD18
0.00152	-0.00218	HIBADH
0.00152	-0.00149	ERMP1
0.00152	-0.000412	PPP2R5E
0.00152	-0.0014	ZNF250
0.00152	-0.00102	EIF3K
0.00152	-0.00042	PITPNM1
0.00152	-0.00124	GTF2E2
0.00151	-0.000624	BCOR
0.00151	-0.000661	ARAF
0.00151	-0.00163	ZXDB
0.00151	-0.000896	FARS2
0.00151	-0.00142	FBXL15
0.00151	-0.00117	EIF3D
0.00151	-0.00152	TRAV38-1
0.0015	-0.00125	CSNK1G3
0.0015	-0.0022	POLR1B
0.0015	-0.000535	PPP1R12A
0.0015	-0.000992	ANGPT2
0.0015	-0.00106	LYPD3
0.0015	-0.000759	AGBL3
0.0015	-0.00163	CEP68
0.0015	-0.00136	CUL1
0.00149	-0.00103	ZNF268
0.00149	-0.000431	PPIF
0.00149	-0.000599	HDAC5
0.00149	-0.000989	SGK494
0.00149	-0.00108	IRF2BP1
0.00149	-0.0021	TBC1D31
0.00148	-0.00127	HDHD3
0.00148	-0.00129	MROH1
0.00148	-0.00162	RAB29
0.00148	-0.00145	TOR1AIP2
0.00148	-0.00133	NSG1
0.00148	-0.00139	NFE2L2
0.00148	-0.000182	OLMALINC
0.00148	-0.00222	USP13
0.00147	-0.00101	LIG3
0.00147	-0.00101	PELO
0.00147	-0.000405	IFFO2
0.00147	-0.00236	ZNF518A
0.00146	-0.0015	TMEM30A
0.00146	-0.00133	CSAD
0.00146	-0.00211	ACYP1
0.00146	-0.00103	PDCD1
0.00146	-0.000722	ABCD3
0.00146	-0.00172	ZNF219
0.00146	-0.00112	ZNF24
0.00145	-0.000884	DBT
0.00145	-0.00265	DDX10
0.00145	-0.000356	HKR1
0.00145	-0.000778	UBOX5
0.00145	-0.00124	TLCD2
0.00145	-0.00108	METTL9
0.00145	-0.00161	MACROD1
0.00144	-0.00161	TMCO4
0.00144	-0.000718	DUSP4
0.00144	-0.00138	FBXO44
0.00144	-0.000578	AMMECR1L
0.00144	-0.000363	ZFYVE19
0.00144	-0.00117	ZMYM6
0.00144	-0.00182	TMEM266
0.00144	-0.00162	LINC01521
0.00143	-0.00105	NEK11
0.00143	-0.000844	ZNF492
0.00143	4.46e-05	ASCC1
0.00143	-0.00139	ZNF713
0.00143	-0.00106	CEBPB
0.00143	-0.000518	TMEM243
0.00143	-0.00107	RABEP2
0.00142	-0.000964	CBR4
0.00142	-0.00119	NFKB2
0.00142	-0.00132	CCBE1
0.00142	-0.00108	SLC4A4
0.00142	-0.00234	ANKRD42
0.00142	-0.00113	COG8
0.00142	-0.00116	NUDT19
0.00142	-0.000873	WWOX
0.00142	-0.000778	STK40
0.00142	-0.00134	LGMN
0.00141	-0.00182	SCRN2
0.00141	-0.00131	CAND1
0.00141	-0.000926	GRASP
0.00141	-0.00141	PPP2R3A
0.00141	-0.00211	ABHD8
0.0014	-0.000228	ZNF346
0.0014	-0.000776	LINC00330
0.0014	-0.000668	TRRAP
0.0014	-0.00103	STK39
0.0014	-0.00113	UBA2
0.0014	-0.000673	ALAS1
0.0014	-0.00171	FLI1
0.0014	-0.00268	PRKDC
0.00139	-0.000557	IFI16
0.00139	-0.00157	TRAV4
0.00139	-0.000751	ZSCAN30
0.00139	-0.00193	PMPCA
0.00139	-0.00114	GPRASP1
0.00139	-0.00157	FAM96A
0.00138	-0.00104	MLLT6
0.00138	-0.00145	SMAD4
0.00138	-0.00164	BDH2
0.00138	-0.00112	GDPD5
0.00138	-0.00109	ATN1
0.00137	-0.00107	TRGC2
0.00137	-0.00113	C5orf22
0.00137	-0.00118	ST20
0.00137	-0.00165	HAP1
0.00137	-0.00149	SNRPN
0.00137	-0.000854	COPS8
0.00137	-0.00122	RUVBL2
0.00136	-0.000711	SRGAP1
0.00136	-0.00174	CREBBP
0.00136	-0.000895	ALYREF
0.00136	-0.00043	ZCCHC4
0.00135	-0.000354	MED24
0.00135	-0.00126	EIF2D
0.00135	-0.000908	PCYT2
0.00135	-0.00164	HEBP1
0.00135	-0.000899	TRG-AS1
0.00135	-0.00118	LMAN2
0.00134	-0.00157	SIVA1
0.00134	-0.000321	RORA-AS1
0.00134	-0.000471	GPR146
0.00134	-0.00165	CISD2
0.00134	-0.000917	FBXL19-AS1
0.00134	-4.84e-05	THG1L
0.00134	-0.000896	HNRNPA1L2
0.00133	-0.000604	CYP2R1
0.00133	-0.00159	IL24
0.00133	-0.00125	EIF3B
0.00133	-0.000761	QPRT
0.00133	-0.000283	ZNF529-AS1
0.00133	-0.000954	TRAV24
0.00133	-0.00183	ZNF823
0.00133	-0.00119	ZBTB21
0.00133	-0.00106	TRAF7
0.00132	1.77e-05	CRTAP
0.00132	-0.000656	NAT1
0.00132	-0.0006	MAT2B
0.00132	-0.00183	TM2D3
0.00132	-0.00251	TMEM248
0.00132	-0.0009	KIAA1324
0.00132	-0.000221	CPT1A
0.00132	-0.000991	SMIM10L1
0.00132	-0.000106	UCK1
0.00132	-0.00226	NXPE3
0.00131	-0.000379	ZNF596
0.00131	4.86e-05	ZNF277
0.00131	-0.000939	TOMM40L
0.00131	-0.000612	C4orf48
0.00131	-0.0012	TIMM21
0.00131	0.000403	AKAP10
0.00131	-0.00159	ZBTB8A
0.00131	-0.000984	COX7C
0.0013	-0.000427	EIF2S1
0.0013	-0.00198	CTPS1
0.0013	-0.00234	ASF1A
0.0013	-0.00156	CCDC22
0.00129	-0.00126	CAPN7
0.00129	-0.000736	YTHDF3
0.00129	-0.000925	TRAV14DV4
0.00129	-0.000698	LENG9
0.00129	-0.0014	NOA1
0.00129	-0.000804	CASP7
0.00129	-0.00185	SLC16A4
0.00128	-0.00167	ISG15
0.00128	-0.00147	WBP11
0.00128	-0.000962	PAFAH1B3
0.00128	-0.000351	SLC39A8
0.00128	-0.000709	VPS51
0.00128	-0.00183	MX2
0.00128	-0.000469	YIPF1
0.00128	-0.00107	SURF1
0.00128	-0.000703	C11orf21
0.00128	-0.00225	WWC3
0.00128	-0.000415	SLC38A9
0.00127	-0.00124	AKAP17A
0.00127	-0.00208	NEDD8
0.00127	-0.000923	NELL2
0.00127	-0.000332	ADARB2
0.00127	-0.00213	DONSON
0.00126	-0.000218	ZBED4
0.00126	-0.00104	RANGRF
0.00126	-0.000484	ZNF664
0.00126	-0.00125	S100A4
0.00125	-0.000324	TPI1
0.00125	-0.00117	CCDC84
0.00125	-0.000675	ITIH5
0.00125	-0.00185	MMS22L
0.00125	-0.00115	SOS1
0.00125	-0.00268	PIGX
0.00125	-0.000919	CXorf40B
0.00125	-0.00155	USP46
0.00125	-0.000939	BLCAP
0.00125	-9.09e-05	SUMO4
0.00124	-0.00118	ARL17A
0.00124	-0.000541	CSTF3
0.00124	-0.000531	ASL
0.00124	-0.00115	GABARAPL1
0.00124	0.000779	NCSTN
0.00124	-0.00102	GREM1
0.00124	-0.000461	CREM
0.00124	-0.00165	STAG1
0.00124	-0.00031	YIF1B
0.00123	-0.000372	KLHL7
0.00123	-0.000958	TYW5
0.00123	-0.00203	IL2RG
0.00123	-0.000829	EPHA1-AS1
0.00123	-0.000533	DPM1
0.00123	-0.00102	CMTR1
0.00123	-0.000812	ZNF813
0.00123	-0.00123	IGLC2
0.00123	-0.00066	POLR2D
0.00123	-0.00173	B3GLCT
0.00123	-6.41e-05	ZC3H18
0.00122	-0.00103	TMED10
0.00122	-0.00114	ZNF362
0.00122	-0.00129	GPR183
0.00122	-0.00101	ARL2
0.00122	-0.000733	CMPK2
0.00122	-0.000432	NPDC1
0.00122	-0.000123	RANBP3
0.00122	-0.000713	RALGAPA2
0.00122	-0.000333	NAA30
0.00122	-0.00204	GDE1
0.00121	-0.000203	KIF1BP
0.00121	-0.000863	TRAF4
0.00121	-0.00117	INVS
0.00121	-0.000467	KATNBL1
0.00121	-0.0023	CEBPD
0.00121	-0.000897	RBM48
0.00121	-0.000357	GTDC1
0.00121	-0.00197	ZBTB5
0.00121	-0.00195	YY1AP1
0.00121	-0.000855	DMPK
0.00121	-0.00129	SPATC1L
0.00121	-0.00174	OGFOD2
0.00121	-0.000153	GRHL1
0.0012	-0.000906	FHOD1
0.0012	-0.000689	CCDC126
0.0012	-0.000207	DYNC2H1
0.0012	-0.000664	CD84
0.0012	-0.00104	JPX
0.0012	-0.000375	CD160
0.0012	-0.00112	IQSEC1
0.0012	-0.00159	LDHA
0.0012	-0.00191	TMPRSS7
0.00119	-0.00103	LINC01588
0.00119	-0.000504	MIR181A1HG
0.00119	-0.000659	DYNLL1
0.00118	-0.00112	MAPKAP1
0.00118	-0.000823	SENP1
0.00118	-0.0009	AK6
0.00118	0.000415	OGFOD1
0.00118	-0.00143	STYX
0.00118	5.61e-05	NAMPT
0.00117	-0.00032	ZNF14
0.00117	-0.000379	EMC9
0.00117	-0.00129	CYP46A1
0.00117	-0.000768	PYROXD1
0.00117	-0.00164	SLC22A5
0.00117	-0.00151	PSMD14
0.00117	-0.000165	EFNB1
0.00117	-0.000514	TMEM167B
0.00117	-0.00183	C10orf91
0.00117	-0.000955	HDAC3
0.00117	-0.00123	DNAJC27-AS1
0.00117	-0.00165	GOLGA4
0.00117	-0.00018	SRGAP2B
0.00117	-0.000753	PRELID3B
0.00117	-0.00149	DDIT4
0.00117	-0.0011	RUFY1
0.00116	0.000533	INTS12
0.00116	-0.00103	TRBV15
0.00116	-0.000637	KANSL3
0.00116	-0.00249	SP2
0.00116	-0.00149	HEBP2
0.00116	-0.000997	DDX56
0.00116	-0.00118	CCR6
0.00116	-0.00159	FGF7
0.00115	-0.00103	IPP
0.00115	-5.78e-06	AP3B1
0.00115	-0.00114	TRBV6-5
0.00115	-0.0013	IL12RB2
0.00115	-0.000672	CPEB2
0.00115	-0.000778	WDYHV1
0.00115	-0.00069	RBAK-RBAKDN
0.00115	-0.00013	VPS41
0.00115	-0.00112	TM9SF2
0.00115	-0.00142	HDHD2
0.00115	-0.000672	ST3GAL2
0.00114	0.000124	SAP30
0.00114	-0.000542	ACAD11
0.00114	-0.00049	MED9
0.00114	-0.0011	TMX3
0.00114	-0.00203	PRPF3
0.00114	-0.000532	INTS1
0.00114	-0.00148	PAK1
0.00114	-0.00107	C19orf47
0.00114	-0.00177	YWHAH
0.00114	-0.00143	TCAIM
0.00114	-0.00167	LINC00909
0.00114	-0.00104	VPS52
0.00113	-0.000592	C21orf91
0.00113	-0.0004	KIAA0319L
0.00113	-0.0011	RABGAP1
0.00113	-0.00034	PLEKHA2
0.00113	-0.000241	BCL2L13
0.00113	-0.000604	WDR92
0.00113	-0.000265	RABGGTB
0.00113	-0.00121	POLR2H
0.00113	-0.00109	DNAAF1
0.00113	-0.00119	FCGBP
0.00113	-0.00153	HIST2H2BF
0.00112	-0.000898	SYTL4
0.00112	-0.000959	CCNL2
0.00112	-0.00155	TTC28
0.00112	-0.000954	TMED7
0.00112	-0.00192	TTC7B
0.00112	-0.00121	GRAMD1A
0.00112	0.000429	HLA-DQB1
0.00112	-0.0025	BRI3BP
0.00112	-0.00127	KAT2A
0.00112	-0.00116	FLYWCH1
0.00112	-0.00129	SATB1
0.00111	-0.000157	PRDM2
0.00111	-0.00162	AC006369.2
0.00111	-0.000206	ZBTB20-AS2
0.00111	-0.00185	P4HA1
0.00111	-0.00129	TOR1B
0.00111	-0.000692	NDRG3
0.00111	-0.00165	UBL7-AS1
0.00111	-0.00053	ZHX3
0.00111	-0.00108	CYBA
0.00111	-0.000381	CENPK
0.00111	-0.000971	ERAL1
0.0011	-0.000667	TUBB4B
0.0011	-0.000624	CASP8
0.0011	-0.000828	UBE2O
0.0011	-0.000158	TARBP2
0.0011	-0.000617	AGA
0.0011	-0.00141	FAM32A
0.00109	-0.000832	CDC23
0.00109	-0.00205	GSAP
0.00109	-0.000122	RHOT1
0.00109	-0.000872	PQLC1
0.00109	-0.00182	ACY1
0.00109	-0.000186	MYO1D
0.00109	0.000731	BORCS5
0.00109	-0.000916	NDRG1
0.00109	-0.00197	RSL24D1
0.00108	-0.00123	R3HDM1
0.00108	-0.000704	AC240274.1
0.00108	-0.00122	ERF
0.00108	-0.00174	PARD6A
0.00108	-0.00114	CCPG1
0.00108	-0.000804	POTEE
0.00108	-4.13e-05	ATXN7L3
0.00108	-8.28e-05	CMTM8
0.00108	-0.0011	IQCB1
0.00108	-0.00144	DHDDS
0.00108	-0.000654	BRCA1
0.00107	-0.00146	TNFAIP2
0.00107	-0.00124	SLC43A3
0.00107	9.19e-05	SLC35A4
0.00107	-0.00112	C16orf95
0.00107	-0.00103	PHKA2
0.00107	-0.00184	WRNIP1
0.00107	-0.000708	VEZT
0.00107	-0.000281	SPEF2
0.00107	-0.0013	NKIRAS1
0.00107	-0.00108	HOXB2
0.00107	-0.00102	TMEM140
0.00107	-0.000517	RIOK1
0.00106	-0.00022	CRELD2
0.00106	-0.00131	TRAT1
0.00106	1.12e-05	ACACA
0.00106	-0.000486	DMGDH
0.00106	-0.000629	KRT18
0.00106	-0.00159	TNKS
0.00106	-0.000125	MOAP1
0.00106	-0.000924	NDUFB6
0.00106	-0.00139	MOSPD2
0.00106	-0.00108	RELL2
0.00106	-0.00215	PQBP1
0.00105	-0.000179	POGLUT1
0.00105	-0.00116	MRPL12
0.00105	-0.00138	CCDC138
0.00105	-0.000501	OSTM1
0.00105	-0.000752	ELP5
0.00105	-0.000294	VRK2
0.00105	-0.000664	NRM
0.00105	-0.000933	PNPO
0.00105	0.000549	ALG3
0.00105	-0.000873	MOV10
0.00105	6.29e-05	TRIM5
0.00105	-0.000683	LTB4R2
0.00104	-0.00108	YBX1
0.00104	-0.000244	H3F3A
0.00104	-0.000599	FOXK1
0.00104	-0.000168	PTGES3
0.00104	-0.00127	ZNF843
0.00104	-0.00108	MAPRE3
0.00104	-0.0017	CFAP74
0.00104	-0.000694	CEP44
0.00104	-0.00153	TMEM50A
0.00104	-0.00104	ZNF600
0.00104	-0.00126	ARID3A
0.00103	-0.000355	LETM2
0.00103	-0.000728	ZNF658
0.00103	-0.000613	CEPT1
0.00103	-0.00082	COQ10A
0.00103	-0.00043	PECR
0.00103	-0.000446	ICK
0.00103	-0.00167	FERMT2
0.00103	-0.00133	DNAL4
0.00103	-0.00168	BCKDK
0.00103	-0.000512	ARID1A
0.00103	-0.00134	RGS3
0.00103	-0.000452	POLG2
0.00103	-0.00133	DXO
0.00102	-0.00131	TLR7
0.00102	-0.000919	AC159540.1
0.00102	-0.000851	MGAT5
0.00102	-0.00029	PTRH2
0.00102	-0.000487	MSRA
0.00102	-0.00108	MPRIP
0.00102	-0.000674	ZNF26
0.00102	-0.00165	RELT
0.00102	-0.000183	LZTS2
0.00102	-0.00127	SH3D19
0.00102	-0.000812	ZNF106
0.00102	-0.000263	RFX5
0.00101	-0.000798	SRSF3
0.00101	-0.000455	TBC1D1
0.00101	-0.000235	SREK1
0.00101	5.89e-05	CDK5RAP2
0.00101	-0.0014	SPNS1
0.00101	-0.000397	LINC01481
0.00101	-0.000695	FARSB
0.001	0.000594	XRCC5
0.001	-0.000925	IQCE
0.001	0.00109	PTK2
0.001	-0.000104	NFYC-AS1
0.001	-0.00123	KLC1
0.000999	-0.000881	NOL9
0.000999	-0.00025	MPRIP-AS1
0.000998	-0.00164	TRPV3
0.000997	-0.000866	UPP1
0.000997	-0.00138	PSTPIP2
0.000996	-0.000216	PPOX
0.000995	-0.000545	C12orf60
0.000993	-0.000702	CXCR5
0.000992	-0.00146	RASGRP2
0.00099	-0.000924	SCARB2
0.00099	-0.000365	TFDP1
0.00099	-0.000538	WDR47
0.000989	-0.000873	C7orf43
0.000986	-0.000402	GTF2F1
0.000985	-0.000522	GALT
0.000982	-0.000142	ERMAP
0.000982	-0.00131	SPPL2B
0.000982	-0.000835	STAU2
0.000981	-0.000657	HIST1H2AL
0.00098	-0.000615	LZTR1
0.000978	-0.000772	ZNF320
0.000977	-0.00103	NR4A1
0.000975	-0.000558	PTPDC1
0.000974	-0.00103	ZW10
0.000974	-0.000669	KARS
0.000972	-0.000928	HGSNAT
0.000971	-0.00129	GORASP2
0.00097	-0.000861	ZNF143
0.000968	-0.0014	LSM5
0.000967	-0.00119	RND1
0.000967	-0.0011	SNX1
0.000965	-0.00126	SLK
0.000963	-0.00105	ARHGAP19
0.00096	0.000297	SF3A3
0.000959	-0.00027	TOB1
0.000959	0.000119	NSFL1C
0.000955	-0.00028	AMIGO1
0.000955	-0.000694	AP1AR
0.000955	-0.000906	OBSCN
0.000954	-0.000388	BLVRA
0.000953	3.41e-05	SEC24A
0.000952	0.000564	CLSTN3
0.000951	-0.00182	GPX7
0.00095	-0.000865	CRBN
0.000949	-0.00145	MRPL10
0.000949	-0.000649	OSM
0.000948	-0.000855	LOXL1
0.000948	-0.00012	MAPK13
0.000947	-0.00142	TMEM33
0.000947	-0.000207	LEKR1
0.000946	-0.000832	CCDC130
0.000946	-0.000699	RNF139-AS1
0.000945	-0.000902	TMEM160
0.000944	-0.000758	PLA2G6
0.000944	-0.00183	ATP1B1
0.000943	-0.000304	TONSL
0.000942	-0.00108	TBC1D10A
0.000941	0.000391	VANGL1
0.000941	-0.000876	ALKBH1
0.00094	-0.00137	MAST1
0.000939	-0.000547	AL645728.1
0.000935	-0.000454	FEM1C
0.000934	-0.00147	SWI5
0.000933	0.00028	PRKCI
0.000931	-0.00116	PGD
0.000928	-0.000954	PLCB1
0.000926	-0.00152	ALG2
0.000926	-0.00071	DLD
0.000926	-0.000448	METTL25
0.000923	-0.00135	ZBTB45
0.000922	-0.0011	POMK
0.000921	-0.000749	KCNMB1
0.000921	-0.000265	ZNF574
0.00092	-0.000562	RAD9A
0.000919	0.000106	SYNC
0.000918	-0.000953	SUMO2
0.000916	-0.00097	C19orf24
0.000915	-0.000872	COLQ
0.000912	0.000735	LSM7
0.000911	-0.000404	CAMKK2
0.000911	-0.000541	FAM213B
0.00091	-0.000852	IRF2BPL
0.00091	-0.000215	HIST1H3H
0.000909	-0.000512	PHAX
0.000908	-0.00128	DDX1
0.000908	-0.00146	TMEM143
0.000906	-0.000779	CLN5
0.000906	-0.000223	UBE2D1
0.000905	-0.000525	NDOR1
0.000904	-0.000248	CCT4
0.000902	-0.00057	IGKC
0.000901	0.000695	NELFE
0.000899	-0.00141	SLX4IP
0.000899	-0.000107	NUTF2
0.000898	-0.000429	PTK7
0.000895	-0.000811	PHF19
0.000894	-0.000587	C12orf4
0.000893	-0.000483	GMPS
0.000892	0.000906	LINC00402
0.000891	-0.000582	TOLLIP
0.00089	-0.002	SH3GLB2
0.000889	-0.000944	TOMM20
0.000886	0.00101	GPR82
0.000886	-0.000608	GLG1
0.000885	-0.000778	SOCS5
0.000882	-0.00102	RALGPS2
0.000879	-0.000375	DFFB
0.000877	-0.00124	LNX1
0.000876	-0.00149	NCOR2
0.000875	-0.000683	SUMO1
0.000871	-0.00109	C2orf68
0.00087	-0.000229	HSF1
0.000868	-0.000933	AGPS
0.000867	-0.000929	VTA1
0.000866	-0.0002	EFCAB13
0.000865	-0.00137	ZNF397
0.000865	-0.000118	RUBCN
0.000862	-0.000167	FAAP24
0.00086	-0.000386	TSIX
0.000859	-0.000724	DHX29
0.000856	-0.00106	ACAP3
0.000856	-0.000432	SNRNP70
0.000856	-0.000926	VPS45
0.000855	-6.81e-05	CSF1
0.000855	-0.00109	CDK9
0.000854	-0.00228	ME1
0.000854	-0.00121	LIX1L
0.000854	-0.000939	NDUFAF2
0.000853	-0.000934	CDC40
0.000851	-0.00186	FAM120C
0.00085	-0.00115	RBM42
0.000849	-0.000663	CPTP
0.000848	-0.000943	TBC1D32
0.000847	-0.00174	TMUB2
0.000847	0.000409	KLHDC1
0.000846	-0.000739	PLEKHB1
0.000844	-0.00157	FAM215B
0.000844	-0.00115	APBA1
0.000842	-0.00092	TGIF2
0.000842	-0.0015	ZNF79
0.000841	0.000361	ZKSCAN2
0.00084	0.000148	ZFP64
0.000839	3.14e-05	NOG
0.000838	-6.46e-06	MFN2
0.000837	-0.000218	UBAC2
0.000836	-0.00155	SAMD1
0.000835	-0.000536	PGM2
0.000835	-0.000281	FAM13A
0.000834	-0.000529	MFN1
0.000834	-0.000655	NASP
0.000834	0.000396	GPATCH2
0.000833	-0.000959	C11orf54
0.000831	-1.5e-05	KCTD20
0.000828	-0.000494	MSH6
0.000824	-0.0018	ERGIC1
0.000823	-0.000392	MAT2A
0.000819	-0.000182	ELP4
0.000817	-0.000245	AGAP3
0.000816	2.48e-05	ZNF69
0.000815	-0.000817	TP53BP2
0.000811	-0.000147	CYP20A1
0.000811	-0.00101	SGPP1
0.000811	-0.000661	SMIM13
0.000811	-0.000515	EXT2
0.00081	-0.000583	GPS2
0.00081	0.000191	MBTPS1
0.000809	-0.000802	RBFOX3
0.000808	-0.000843	MYO15A
0.000806	-0.000414	LRP10
0.000806	-0.00197	CXorf65
0.000806	0.000116	XPO1
0.000806	0.00072	STK16
0.000806	-0.00103	GNL2
0.000805	-0.00112	CDC27
0.000803	-0.00153	SLC25A17
0.000802	-0.000583	DNAJC21
0.000802	-0.000965	SAMSN1
0.000799	0.000488	HMGXB4
0.000797	-0.00119	SLC16A1-AS1
0.000797	-0.00114	RAMP2-AS1
0.000797	-0.000705	FCHO2
0.000796	-0.00154	USP10
0.000795	-0.000209	CRTAM
0.000795	-0.000808	CMC4
0.000794	-0.00117	THUMPD1
0.000793	-0.00117	EAF1
0.000792	-0.00085	ZNF446
0.000791	-0.000927	SLC25A12
0.00079	-6.94e-05	FOXP3
0.000789	-0.000575	FLII
0.000788	-0.00121	MVP
0.000788	-0.000498	BRCC3
0.000787	-0.00142	SPG7
0.000786	-0.00126	MPC1
0.000784	-0.000701	VAT1
0.000783	-0.00159	RNF139
0.000782	-0.000925	COG6
0.000782	-0.000947	KIF21A
0.000781	-0.000335	PAPOLG
0.00078	-0.000731	ATP7A
0.000779	-0.00158	CCDC40
0.000778	-0.000989	DNAJC2
0.000776	-6.61e-05	KXD1
0.000775	-0.000806	B4GALT1
0.000773	-0.0011	NUDT15
0.000769	-0.00114	HLA-DRB5
0.000769	-0.00062	PIAS1
0.000768	-0.000611	PGM3
0.000768	-0.000899	SAFB2
0.000768	-0.000738	AP4B1
0.000767	-0.000991	GLE1
0.000765	-0.00079	KDM8
0.000764	-0.00108	HNRNPF
0.000764	-0.000637	SDE2
0.000762	-8.76e-05	POLM
0.000761	-0.00131	NLRX1
0.000759	-0.0002	PI16
0.000759	-0.000826	AGK
0.000759	0.000237	PRIMPOL
0.000759	-0.000173	KIAA0556
0.000759	-0.000757	ZNF75D
0.000758	-0.000237	NOMO1
0.000757	-0.000741	SIK1
0.000757	-0.000611	EVI2A
0.000756	-0.000753	PPP2CA
0.000755	-0.000188	NELFA
0.000755	0.000568	PRRC1
0.000755	-0.000888	FAM219A
0.000754	-0.00106	PLEKHD1
0.000753	-0.000405	HYI
0.000752	-0.000976	PIP5K1A
0.000751	-0.000786	MGAT1
0.00075	-0.000822	TIMP1
0.00075	-0.00085	SPECC1L
0.000749	0.000272	TUBA1C
0.000749	-0.000979	SS18
0.000748	-0.000474	FZR1
0.000748	-0.000995	ARL2BP
0.000747	-0.000977	CELF4
0.000747	-0.00141	CDK10
0.000746	0.000169	CAB39
0.000745	-0.000668	SLC40A1
0.000744	-0.000657	ZSWIM7
0.000744	-0.000638	C12orf42
0.000743	-2.51e-05	DVL2
0.000743	-0.000711	PLD2
0.000741	-0.00151	IDH2
0.000738	-0.00075	UBE2Q1
0.000737	0.000165	TRIM35
0.000737	-0.0015	BAK1
0.000737	8.97e-05	ZDHHC16
0.000736	-0.001	LPAR6
0.000736	-0.000386	MAPK7
0.000735	-0.000893	KIF3B
0.000735	-0.000893	PSME2
0.000734	-0.000653	CD151
0.000734	-0.000451	ST6GALNAC4
0.000734	-4.25e-05	HAR1A
0.000733	-0.000713	ENOPH1
0.000732	-0.00024	PRR12
0.000732	-0.000623	BRD3
0.000731	0.00022	DHRS7B
0.000731	-7.69e-06	PPFIA1
0.000729	6.53e-05	NMNAT1
0.000728	0.00025	CHMP2B
0.000727	-0.000154	ADAP1
0.000724	0.000347	PTPN9
0.000724	-7.41e-05	SSTR2
0.000723	-0.00076	GALNT7
0.000722	-0.000997	ASTE1
0.000721	-0.000495	JUND
0.000721	-0.000616	HOMEZ
0.000719	-0.000241	SIRT5
0.000719	-0.00102	G3BP1
0.000718	-0.000613	TEX261
0.000717	-7.08e-05	EIF4ENIF1
0.000717	-0.000254	RNPEP
0.000717	-0.00125	ZC4H2
0.000714	-0.000109	PEMT
0.000712	0.000125	RTEL1
0.000711	-0.000638	GADD45G
0.000711	-0.00121	SHMT1
0.000711	0.000151	ANKUB1
0.000709	-0.000554	SCO2
0.000708	-0.00076	PEX14
0.000707	-0.00135	PHKG1
0.000706	-0.00205	GGA1
0.000705	-0.000112	FOXRED1
0.000704	-0.00129	PRMT5
0.000703	0.00022	TBC1D22A
0.000703	-0.00105	SFXN2
0.000702	-0.00022	PRKCA
0.000702	-0.000675	RASSF5
0.000701	0.000406	UFSP2
0.000701	-0.00189	POLL
0.000699	0.00015	HOTAIRM1
0.000698	0.000339	DCP1B
0.000698	-0.000622	DNAJC15
0.000697	-0.00132	KIAA0513
0.000696	-0.000176	TRAFD1
0.000695	-0.00102	LTN1
0.000695	-0.000625	NR1D1
0.000695	-0.00168	DRAXIN
0.000693	-0.000689	SLC7A11
0.000693	-0.000558	GID4
0.000692	-7.89e-05	VPS37B
0.000691	0.000489	TTLL5
0.000691	-0.000268	POLDIP3
0.00069	-0.001	ZNF354C
0.00069	-0.000728	RPN1
0.000688	-0.000962	PDSS1
0.000687	-0.000822	RAB22A
0.000686	3.47e-05	CD38
0.000683	-0.00129	BCL3
0.000682	-0.000931	ZNF398
0.000679	0.000338	LDAH
0.000679	0.000714	GPR107
0.000679	-0.00133	IPO13
0.000679	-0.000981	HELQ
0.000678	-0.00189	KDM5C
0.000678	-0.000916	MFSD11
0.000678	-0.00134	MICALL1
0.000675	-0.000683	SMC1A
0.000674	-0.00105	KDM3A
0.000673	-0.000439	C1orf52
0.000672	-0.000329	DYNLT3
0.00067	-0.000153	OTUD6B
0.000669	-0.000865	IL4I1
0.000669	-0.000166	EAF2
0.000669	-0.000203	NIF3L1
0.000668	-0.000288	SFXN3
0.000668	-0.000432	GALNT12
0.000668	-0.000573	RND2
0.000667	-0.000542	DTD1
0.000666	0.00029	RPRD1A
0.000665	-0.000929	DHX58
0.000664	-0.000227	AKT2
0.000663	0.000255	TMEM135
0.000661	-0.0011	LRRN3
0.000661	-0.00029	LARP1B
0.00066	-5.09e-05	IRAK1
0.00066	-0.000641	ALDH16A1
0.000659	-0.00037	ZNF326
0.000659	-0.0012	SEC61G
0.000658	-0.000666	MALT1
0.000658	0.000279	RNF130
0.000657	-0.000234	PSMB8-AS1
0.000656	-6.47e-05	TRAF3IP2-AS1
0.000655	-0.000693	ABCC10
0.000653	-5.94e-05	EGLN1
0.000653	0.000513	FANCC
0.000653	-0.000918	CC2D2A
0.000651	-0.000476	MAP3K3
0.000651	1.06e-05	BTBD9
0.00065	-0.000955	HLA-DPB1
0.000649	-0.000557	HPCAL4
0.000648	5.56e-06	FBXL22
0.000646	0.000508	ARHGAP31
0.000646	-0.00102	ISG20L2
0.000644	-0.000501	AC023590.1
0.000643	-0.00112	LAMB1
0.000641	-9.96e-05	BEX2
0.00064	-0.000728	FGFBP3
0.000639	-0.000501	TBC1D14
0.000638	-0.00166	EIF2AK4
0.000638	-0.000957	CDK7
0.000637	-0.000874	MX1
0.000636	-0.000899	POLH
0.000635	7.49e-05	TRGV10
0.000634	-4.75e-05	DNPH1
0.000633	-0.000609	RNF44
0.000633	-0.00122	QSOX1
0.000633	-0.000469	EIF2AK2
0.000632	0.000331	CDNF
0.000631	-0.000382	MLH1
0.000631	-0.00137	SRSF6
0.00063	-0.00055	AMACR
0.00063	-0.00138	SMAD7
0.00063	-0.000673	NFYC
0.000629	-0.000527	SLC35B4
0.000629	-5.05e-05	IDUA
0.000627	0.000204	RAPGEF1
0.000625	-2.05e-05	GSR
0.000623	-0.00114	PLCE1
0.00062	-0.000316	TRAV5
0.00062	-0.00104	WDR48
0.000619	-0.00065	CSDE1
0.000619	-0.00107	FAM98C
0.000619	-0.00096	ARFIP2
0.000619	-0.000757	FBXO34
0.000618	-0.000265	TRIM28
0.000618	-0.000614	SAC3D1
0.000618	0.000268	EPHA1
0.000617	-8.52e-06	ARF4
0.000616	0.00123	CANX
0.000615	0.000692	A1BG
0.000614	-0.00029	TFDP2
0.000614	-0.000355	EDC3
0.000613	-9.79e-05	ZNF524
0.000613	-0.000841	POLA1
0.000613	-0.000682	STK26
0.000613	0.000229	BIRC2
0.000611	-0.000661	PPP1R11
0.000611	-0.000153	NSUN4
0.000608	-0.000252	CYTH1
0.000608	-0.000139	PAXIP1-AS2
0.000607	2.17e-05	GEMIN5
0.000607	-0.000216	PBX3
0.000605	-0.000767	GTF3C2
0.000605	0.000156	SLC25A3
0.000604	-0.00029	SETD6
0.000604	-3.29e-05	RAN
0.000604	0.00012	ALKBH7
0.000603	-0.000786	DYNLL2
0.000602	0.000356	SURF2
0.000601	-0.000412	OTUD3
0.000601	0.00112	QRICH1
0.0006	-0.00111	LRWD1
0.000598	-0.00166	CHRM3-AS2
0.000598	-0.000791	MPPE1
0.000597	-0.00146	GPR150
0.000597	-0.000292	TBC1D9B
0.000597	-0.00224	RING1
0.000597	0.000457	ZNF395
0.000596	-0.00129	G6PC3
0.000594	-0.000621	YDJC
0.000594	-0.000711	ZDHHC7
0.000594	0.000117	NFYA
0.000592	-0.00112	MFSD14A
0.000591	-0.000504	RABAC1
0.000588	-0.00078	PREP
0.000588	-0.00122	NPHP3
0.000586	-0.000813	NSUN5
0.000585	-0.000345	MANSC1
0.000584	-0.00136	DPAGT1
0.000582	-0.000618	TMEM62
0.00058	-0.000505	BEX1
0.000579	-0.000938	TARS
0.000578	-0.000487	GK
0.000577	-0.000442	DSC1
0.000576	-0.000841	MSL3
0.000575	-0.000176	TAMM41
0.000573	-0.000848	GLIDR
0.000573	-0.000101	KLF10
0.000573	-0.00136	SLC16A11
0.000572	1.05e-06	RIMKLB
0.000571	0.00015	GAPDH
0.000571	0.000506	RAB28
0.000571	-0.00123	LUC7L3
0.00057	-0.000692	AP1S1
0.000569	0.00048	TMEM129
0.000568	3.28e-05	BCAT2
0.000566	-0.000549	CHN1
0.000566	0.00058	AP003774.1
0.000565	6.75e-05	NCMAP
0.000565	-0.000146	C8orf37
0.000564	-0.00102	PTS
0.000563	0.000199	CTDSP1
0.000562	-0.000238	ERCC6
0.000561	-0.000291	L3MBTL3
0.000559	-0.00105	TESC
0.000559	-0.000264	FAM91A1
0.000559	-0.00128	RBX1
0.000558	-0.000589	GZF1
0.000558	0.00108	ETV3
0.000558	-0.000427	SLC38A5
0.000557	-0.000423	NFKB1
0.000557	0.000833	NET1
0.000557	-0.00104	STT3B
0.000557	-0.00152	SNHG12
0.000556	-0.000177	STX2
0.000555	-0.000302	AGFG2
0.000555	0.000135	KLC2
0.000553	-0.00142	MSRB3
0.000552	0.000473	PLAUR
0.000549	-0.000807	ANAPC5
0.000549	0.000175	UFM1
0.000548	-0.0008	C6orf99
0.000546	-0.000727	LINC00954
0.000546	-0.000385	AGAP2
0.000546	0.000553	SLC26A4
0.000545	-0.000635	CCT2
0.000544	-4.73e-05	INPP5D
0.000543	0.000443	HIST4H4
0.000542	-0.000605	LAMP3
0.000542	-0.00119	PLIN5
0.000541	-0.0014	NUP210
0.000541	-5.2e-05	CHTF8
0.00054	0.000318	WDR18
0.00054	0.00031	FBXO32
0.000539	0.000396	RANBP6
0.000539	0.000133	PARP9
0.000538	-0.000658	MECR
0.000538	-0.00142	OAZ2
0.000536	5.79e-05	LINC00987
0.000536	0.000808	BTBD8
0.000533	0.000309	SAMD8
0.000533	8.01e-05	SP140
0.000532	0.000603	PPP6R3
0.000532	-0.000625	POLR3H
0.000532	-0.0013	POU2F2
0.000532	-3.35e-05	ALG9
0.000532	-8.31e-05	CAMK2N1
0.000531	0.000697	MNAT1
0.00053	-0.000346	PMF1-BGLAP
0.00053	-0.00153	TMEM39A
0.000529	0.000444	SFPQ
0.000528	-0.000268	TRMT44
0.000528	-0.000175	IFT43
0.000525	-0.000222	NCOA1
0.000525	-0.000306	FNDC3B
0.000524	3.7e-06	EFCAB11
0.000522	0.00027	CDK5
0.000522	0.00028	CASK
0.000522	0.00032	CREG1
0.000521	-0.000645	ABCC4
0.00052	0.000285	CTNNBIP1
0.00052	9.85e-05	ARL15
0.00052	-0.00165	TBC1D25
0.000519	0.000773	GSPT1
0.000517	-0.000311	SIPA1
0.000516	-0.00067	PDLIM2
0.000514	0.000876	ZNF410
0.000514	-0.00127	ADK
0.000513	-0.000881	C12orf10
0.000513	0.00048	HCG18
0.000511	0.000577	AC113404.1
0.00051	-0.00103	RAB5A
0.00051	-0.000239	INAFM1
0.00051	0.000212	TBRG4
0.000509	7.58e-05	BCCIP
0.000508	-0.00143	CALU
0.000508	-0.000831	CASP3
0.000507	-0.000267	ILKAP
0.000506	-4.89e-05	ST3GAL5
0.000505	-0.00106	PELI2
0.000505	0.000373	FAHD2B
0.000504	-4.95e-05	SEC31A
0.000503	-0.00125	AKIP1
0.000502	0.000236	HCFC1
0.0005	-0.000579	FRY
0.000499	0.000131	NEMP1
0.000498	0.000779	PIK3C2B
0.000497	-0.000284	FAM161B
0.000497	0.000235	FKBP5
0.000497	-0.00112	GPM6B
0.000496	-0.000461	TMEM184C
0.000496	-0.0015	TRAPPC6B
0.000496	-9.64e-05	AGPAT2
0.000495	-0.00095	WDR24
0.000495	0.000372	YIF1A
0.000495	-0.0014	WNT10A
0.000494	-0.000851	BICD2
0.000493	0.000384	PPP1R15B
0.000493	-0.000143	MAP4K2
0.000492	-0.000719	SLC35G2
0.000492	-0.000133	ADNP
0.000491	-0.00082	LRRC45
0.000491	-0.000709	SLMAP
0.00049	-0.000686	GBE1
0.00049	-0.000195	KRT8
0.000489	-5.63e-05	C5AR2
0.000489	-0.00118	C17orf80
0.000488	-0.00029	ZC3H15
0.000488	-0.000555	LRRC41
0.000487	0.000405	AKT1S1
0.000487	0.000235	SRPK1
0.000487	-0.000685	GIGYF2
0.000485	-0.00117	STARD4
0.000484	-0.000332	ETHE1
0.000484	-0.000665	AAAS
0.000483	0.000367	JCHAIN
0.000483	-0.000229	PFKFB3
0.000483	-0.000141	ZNF557
0.000481	-0.000596	ANKRD36B
0.000479	0.000142	GTF2H2C
0.000479	-0.00015	TECPR2
0.000478	-0.000742	KEAP1
0.000477	-0.00027	PKN1
0.000477	-0.000286	SRGAP3
0.000476	-0.00138	CACNG8
0.000475	-0.00079	TMEM263
0.000474	-0.000317	LGALS3
0.000474	0.00074	CTLA4
0.000474	-3.86e-05	SLC2A4RG
0.000473	0.000458	IDI1
0.000472	5.13e-05	ABCC1
0.000472	-0.000585	CABP4
0.000472	-0.000918	FBXL6
0.000471	-0.000489	AGPAT1
0.000469	-0.000319	MUL1
0.000468	-0.000411	STRADB
0.000468	-0.000613	ZBTB24
0.000467	-0.000833	CEACAM21
0.000465	-0.000378	SOGA1
0.000465	-0.000725	DENND6B
0.000465	-2.68e-05	XRRA1
0.000464	0.000621	SLC16A3
0.000464	-0.000836	MBNL3
0.000463	6.47e-05	USB1
0.000461	1.65e-05	GNAI2
0.000461	0.000429	PHIP
0.00046	-0.00046	GNG11
0.000459	-0.00079	TAP1
0.000458	0.0013	LMTK2
0.000456	-0.000683	NPAT
0.000455	-0.000524	TMEM106B
0.000453	0.000435	COX10
0.000453	-0.000735	FRMD4B
0.000452	-0.00112	ORAI1
0.000452	-0.00103	ZNF584
0.000452	-0.000998	DUSP23
0.000451	-5.08e-05	MED25
0.000451	-0.00149	PDIA4
0.00045	-0.000687	DDX49
0.00045	-0.00129	NME4
0.00045	0.000266	ELMO1
0.000449	-0.000639	TAF4
0.000448	0.00112	IGLC3
0.000448	-0.000278	LINC00265
0.000447	0.000456	ZNF213-AS1
0.000446	0.000525	BIRC6
0.000446	0.000212	FAM120AOS
0.000445	-0.000749	UBR4
0.000444	0.000128	POLR2C
0.000444	-0.0011	TMEM87B
0.00044	-0.000487	LRBA
0.00044	-0.00017	CLYBL
0.000438	-0.00102	PLEKHB2
0.000438	-0.000763	FMNL3
0.000437	-0.000664	CDCA7L
0.000436	-0.000266	NSA2
0.000435	-0.00143	STX18-AS1
0.000434	-0.000768	SQLE
0.000433	-0.000318	PES1
0.000433	-0.000589	OTUD5
0.000433	4.14e-05	SIN3A
0.000432	-0.000521	MAPKBP1
0.000428	-0.000414	WDR89
0.000428	-0.000193	DEDD2
0.000426	-0.000159	FKBP15
0.000424	3.72e-05	SESN2
0.000423	-0.000473	ANAPC7
0.000421	-0.000536	MAP3K11
0.000421	-6.75e-05	S1PR4
0.00042	-0.000607	CRNKL1
0.000418	-0.000712	RFXAP
0.000418	-0.000652	CCDC144A
0.000418	-0.000143	ELOVL1
0.000417	3.61e-05	FBXW8
0.000416	0.000612	TEP1
0.000416	-0.00126	DOHH
0.000415	-0.00083	BAP1
0.000415	-0.00121	TEX10
0.000413	-0.000309	TIRAP
0.000412	-0.00115	EIF3L
0.000412	-0.000996	OSER1
0.000412	-8.06e-05	CNOT4
0.000409	-0.000306	TMEM30B
0.000408	-0.00118	SRP14-AS1
0.000407	0.00017	NOS3
0.000407	0.000131	SFMBT1
0.000406	-0.000643	GNLY
0.000406	-0.00108	C11orf52
0.000406	-9.69e-05	VAMP4
0.000404	-0.000275	ZC2HC1A
0.000404	-0.000557	PIP5K1C
0.000403	-0.000338	TUBA1B
0.000403	0.000523	CACTIN
0.000401	-0.000243	DHX16
0.000401	-0.000592	PPP1R12C
0.000401	-0.000588	C8orf33
0.0004	-0.000968	SFXN1
0.0004	-0.000511	SNX6
0.000399	-0.000297	MRPS18A
0.000398	-0.000107	ANKRD27
0.000398	-0.00171	VMAC
0.000397	-0.000701	NGLY1
0.000395	-0.00091	PRPF31
0.000395	-0.000501	RBSN
0.000395	-0.000406	CHD6
0.000394	-0.000502	SEPSECS
0.000392	-0.000617	GANAB
0.000392	-0.000274	GABBR1
0.00039	-0.000128	PDE4DIP
0.00039	-0.00129	S100A11
0.000389	-0.000506	TMED4
0.000389	-0.000753	LCK
0.000389	0.000111	ST20-MTHFS
0.000389	0.000173	DND1
0.000389	0.000236	APLP2
0.000387	-0.00138	GALM
0.000386	0.000457	CDC7
0.000386	0.000373	IL2RB
0.000385	-0.000681	PTTG1IP
0.000384	-0.00101	PAIP2
0.000384	-0.00104	CBWD3
0.000384	-0.000207	EDF1
0.000382	-0.000234	NRG2
0.000381	5.44e-05	NHP2
0.000381	-0.00096	PIAS3
0.000378	-0.000307	NVL
0.000378	-0.000194	SLC35B3
0.000377	-0.00109	CC2D1A
0.000376	0.000156	BECN1
0.000373	6.56e-05	IFNG-AS1
0.000371	-0.000959	SERTAD3
0.00037	-0.000873	COX7A2
0.000369	0.00021	GNA15
0.000369	-0.000687	WDR44
0.000368	-0.0014	NOC4L
0.000366	-5.35e-05	CAPN1
0.000366	0.000533	NUDCD1
0.000366	-0.000154	RAD51B
0.000366	-0.0014	NCLN
0.000365	0.00039	UVSSA
0.000365	0.000263	RSRC2
0.000365	-0.000247	MCM6
0.000364	-0.000806	SLC25A26
0.000363	0.000214	C9orf72
0.000363	-0.000435	HARS
0.000361	-0.000549	HERPUD1
0.000361	-0.0007	ADORA2A-AS1
0.000361	0.000318	SPRYD3
0.000361	0.000139	TRIM33
0.00036	-3.88e-05	TCP11L1
0.000358	0.00036	PHLDB1
0.000358	0.000233	EHD4
0.000358	-0.000593	TBP
0.000358	-0.000424	ZNF865
0.000358	-7.36e-05	PHTF1
0.000358	-0.000258	FAM41C
0.000357	0.000388	C12orf45
0.000357	0.00017	SLC37A1
0.000357	-0.00131	EDA
0.000356	-0.00075	RBM34
0.000354	-0.000101	ERLIN2
0.000353	0.000462	NLE1
0.000352	0.000746	SWT1
0.000352	-0.000857	RNF26
0.000352	-0.00068	PSD4
0.000352	-0.000714	TMEM209
0.000351	-0.000285	XPR1
0.000351	0.000213	PKP4
0.000351	-0.0018	MPP6
0.000349	-0.000945	PER3
0.000348	-0.000253	ATAD3B
0.000348	2.67e-05	PRKAR2B
0.000348	-0.00024	TRMT13
0.000347	-3.65e-05	NDUFAF5
0.000347	-0.00158	RAB3GAP2
0.000347	-0.00103	HBP1
0.000347	0.000108	SLC5A6
0.000346	-0.000568	SOX4
0.000345	-0.00058	PPTC7
0.000344	0.000184	KBTBD7
0.000343	-0.000157	EIF3A
0.000342	-0.00077	RPTOR
0.000341	-0.000458	MYBL1
0.00034	0.000353	SH3GL1
0.00034	-0.00124	ANXA6
0.00034	-0.000973	MSL2
0.00034	-0.00139	HIST1H2AE
0.000339	-0.00186	MARS2
0.000338	9.22e-05	C3orf38
0.000338	-0.000846	C1RL
0.000337	-0.000594	TFAM
0.000336	0.000604	RNF121
0.000335	-0.000553	SRBD1
0.000334	-7.12e-06	COMMD10
0.000333	0.000131	MAP3K6
0.000333	0.000519	SERINC3
0.000333	-0.000144	ASB6
0.000333	-0.000619	POLE2
0.000332	-0.00031	CKAP5
0.000329	-0.000842	HYOU1
0.000329	-0.00112	NOP9
0.000329	-0.000537	KIF9
0.000328	-0.000936	CNNM2
0.000328	0.000262	NGDN
0.000327	-0.000729	CEACAM1
0.000325	0.000132	ZNF785
0.000325	-0.000251	IPMK
0.000324	-0.00069	STAP1
0.000324	-0.000956	SPINK2
0.000324	-0.000546	TVP23B
0.000323	0.000247	MFSD3
0.000323	-0.000489	TMEM242
0.000322	-0.000434	CTU2
0.000321	-9.98e-06	KLHL24
0.00032	0.00073	ZNF592
0.000318	-0.000871	CHCHD3
0.000317	-0.000471	AHSA1
0.000315	0.000432	RMDN1
0.000313	-0.000268	C5orf34
0.000313	-0.000341	SAMD10
0.000312	-0.000319	SRCAP
0.000312	-0.000751	ZNF517
0.00031	-0.000851	DDX60
0.000309	-0.000535	JAKMIP1
0.000309	0.00121	MRPS18C
0.000307	6.49e-05	KLHL11
0.000306	-0.000317	AP1M1
0.000305	-0.000163	TRAF3
0.000304	0.000765	LEMD2
0.000302	0.000106	MYO9A
0.000301	-0.00124	MFSD1
0.000301	0.000459	NPM3
0.000301	-0.00141	ALG10
0.0003	-0.00056	AGPAT4
0.0003	-0.000531	TSPAN5
0.000299	-0.000157	C19orf12
0.000299	0.00168	STYXL1
0.000299	0.000897	CHPF
0.000299	1.66e-05	RNF220
0.000299	-0.000677	PI4KB
0.000297	-0.000701	CSNK1G1
0.000297	-0.000349	CCZ1
0.000297	-0.00021	UTP18
0.000295	6.07e-05	ZNF800
0.000295	-3.81e-05	RSPH3
0.000294	0.000358	ELMOD2
0.000293	-0.00055	ABCF3
0.000291	0.00123	PPIP5K2
0.000291	0.000276	RNF24
0.000291	0.000452	KCTD21-AS1
0.000291	-0.000318	CYB561D1
0.000289	-0.000541	ANKFY1
0.000289	-0.000232	TULP3
0.000289	-5.53e-05	RAB4A
0.000286	-0.00161	TOE1
0.000286	-0.000159	OGFOD3
0.000285	0.000415	FAM185A
0.000284	4.19e-05	PPAT
0.000284	-0.000595	ERCC8
0.000283	-0.0007	HILPDA
0.000283	-0.00102	TINF2
0.000281	0.000214	HSPA4L
0.000281	-0.000996	GIMAP5
0.000279	0.000125	PIK3C3
0.000278	-0.00153	EVI2B
0.000278	0.00135	MAML2
0.000277	0.000453	GATB
0.000277	-0.00129	WDR41
0.000277	0.00068	SLC25A53
0.000276	-0.000583	TYROBP
0.000276	-0.00051	AP3M1
0.000275	-0.000845	KLHL21
0.000274	-0.000779	MMP25-AS1
0.000273	0.000304	POLR2G
0.000273	0.000758	GNAO1
0.000272	-4.18e-05	BNIP3L
0.000271	-0.000354	NPIPA1
0.000271	-0.000725	BBS2
0.00027	-0.000349	KDM5B
0.00027	-0.000528	DUS1L
0.00027	-0.000125	LINC00324
0.000269	-1.93e-05	RAB3B
0.000267	0.000349	PCSK5
0.000265	-0.000769	BTD
0.000265	-0.000548	NCKAP1
0.000264	2.06e-05	SPIB
0.000264	0.000135	NEAT1
0.000264	0.000457	IKBKG
0.000263	0.000459	GCLM
0.000263	-0.00102	CCDC18
0.000262	-0.000699	ZCCHC2
0.000262	0.000506	SYNGAP1
0.000261	0.000165	PITPNA-AS1
0.000259	-0.000604	PFDN1
0.000258	-0.000318	SLC39A13
0.000257	-0.000612	CGGBP1
0.000257	0.000314	INTS9
0.000257	-2.59e-05	GMFB
0.000256	-0.000462	ZNF708
0.000255	-0.00124	LPCAT1
0.000254	5.88e-05	TTC4
0.000249	0.000486	ANKRD17
0.000249	0.00144	KCTD13
0.000249	0.000436	UBE4A
0.000248	-0.000925	CYB5D2
0.000247	-0.00066	WRAP53
0.000246	-3.02e-05	PRPSAP1
0.000246	-0.000417	PI4K2B
0.000245	0.000102	TIGD1
0.000245	0.000292	MFSD2B
0.000245	6.36e-05	KIAA1191
0.000245	-0.000607	IPO7
0.000244	-0.000243	SYNE2
0.000243	0.000726	GPR89B
0.000241	-0.000813	ICMT
0.000241	7.23e-05	IPO8
0.00024	0.000634	ORC3
0.00024	-0.00068	PLOD3
0.000239	-0.000975	BCORL1
0.000237	-0.000287	SNRPD2
0.000236	-0.000622	COX7B
0.000236	-1.74e-05	ANXA11
0.000235	-0.00095	GGT1
0.000235	-0.000207	TRIM58
0.000235	-7.24e-05	RAB11FIP4
0.000235	-0.000227	APOBEC3F
0.000235	-0.000993	UROS
0.000234	-0.00114	CYB5R1
0.000233	0.000224	REM2
0.000232	-0.000704	TRABD2A
0.000231	-0.000315	ZNF23
0.00023	0.000442	POMC
0.000229	0.000373	ABHD2
0.000228	0.000451	CD101
0.000227	-0.000581	PECAM1
0.000226	-0.000314	BTN3A3
0.000226	-0.000583	TRPC1
0.000225	-0.000542	TSPAN14
0.000224	-0.000769	ZMYND8
0.000223	-5.08e-05	ADCK1
0.000222	-4.45e-05	MCCC1
0.000222	0.00032	ZFAT
0.00022	-0.000571	LRSAM1
0.00022	-0.000741	ZNF347
0.00022	2.03e-05	GCDH
0.000219	-0.000451	R3HCC1L
0.000218	5.32e-05	SUCLG2-AS1
0.000218	0.00026	SARS2
0.000218	-0.000366	TRPC4AP
0.000218	-0.000643	BEST1
0.000217	0.000252	WDR74
0.000216	-0.00113	MSRB2
0.000216	-0.0004	LIN9
0.000216	0.000212	SLC50A1
0.000215	-0.000566	CCDC65
0.000214	-0.00102	L3HYPDH
0.000214	-0.000395	PNMA1
0.000214	0.000115	CCDC86
0.000213	0.00036	ZNF683
0.000213	-0.000824	CA2
0.000211	-0.000116	NLRP6
0.000211	0.000774	SP140L
0.00021	0.000141	TRAF3IP3
0.000209	-0.000103	TRAV9-2
0.000208	0.000197	PABPC1L
0.000206	-7.54e-05	ULK3
0.000206	-0.00012	BLMH
0.000205	-0.000591	KLHL22
0.000204	0.000189	CENPJ
0.000204	-0.000351	EFCAB14
0.000204	-0.000242	PLSCR1
0.000204	0.000739	KIF3A
0.000204	0.000227	TGFB1
0.000202	0.000409	ZNF287
0.000201	-0.000476	IMP4
0.0002	-0.00122	KDM1A
0.000199	-0.000278	GPCPD1
0.000199	-0.000918	C20orf27
[truncated: 4,861 more rows]
