# Supplementary material for: Linking COVID-19 to Neurodegeneration: A Single-Cell Deep Learning Study of PBMCs in Multiple Sclerosis and Alzheimer’s Disease
Source: Research Square preprint supplement (doi:10.21203/rs.3.rs-7342199/v1), 2025-10-08
Supplement: Supplementary file 10 [file ff1acba164dcac7cbe2ff965.xlsx]

## Sheet: Sheet1
Table2. sorted_data_Monocyte_Covid
Class0	Class1	gene
10.3	-8.95	XIST
7.82	-6.77	HLA-DRB5
5.47	-4.64	IGKV2-30
5.4	-4.6	SULT1A1
4.9	-4.22	RNF144B
4.53	-3.96	ACAA2
4.11	-3.63	ATP13A3
4.07	-3.56	MIR22HG
3.94	-3.38	RTL6
3.65	-3.23	FCAR
3.64	-3.16	SNHG15
3.61	-3.23	JCHAIN
3.57	-3.27	C20orf27
3.54	-3.2	F3
3.47	-3.22	EBP
3.47	-3.05	NEBL
3.45	-2.97	IGKV3-20
3.39	-3.27	SERPINB2
3.3	-2.82	COX7A1
3.29	-2.88	U2AF1L5
3.25	-2.82	IGHV1-69
3.18	-2.66	FBN2
3.15	-2.66	ELANE
3.14	-2.69	TUBB6
3.13	-2.79	RHEB
3.1	-2.71	MMP9
3.04	-2.63	CPT1A
3.04	-2.65	IGLV3-19
3.02	-2.63	HLA-DQA2
3.01	-2.74	TIPARP
3.01	-2.52	BOLA2-SMG1P6
2.99	-2.58	MIR181A1HG
2.98	-2.53	IGKC
2.97	-2.58	SNRPA1
2.95	-2.59	ARMH1
2.95	-2.56	TPST1
2.94	-2.62	NFIL3
2.94	-2.6	ADAM15
2.92	-2.55	KBTBD7
2.91	-2.55	VAMP5
2.89	-2.44	LILRA4
2.87	-2.46	B3GAT3
2.86	-2.61	PHLDA1
2.84	-2.59	PTGER2
2.84	-2.44	PTK2
2.82	-2.47	ST14
2.82	-2.5	IGHV3-7
2.78	-2.5	ZDHHC24
2.78	-2.43	IGHV3-33
2.77	-2.57	C15orf48
2.76	-2.45	EIF1AX
2.76	-2.35	ACSL1
2.76	-2.33	CYP4F22
2.76	-2.43	IGLV8-61
2.75	-2.39	TOP1MT
2.72	-2.46	ANKRD28
2.72	-2.38	FCGR1A
2.72	-2.35	FCGR1B
2.72	-2.41	DDX3X
2.7	-2.38	NAF1
2.68	-2.31	IGHV1-3
2.66	-2.31	CDS2
2.66	-2.42	IGLV1-47
2.66	-2.42	AC245128.3
2.65	-2.31	SUN2
2.6	-2.3	LILRB1
2.59	-2.22	FLVCR2
2.59	-2.25	SNX9
2.59	-2.32	ADARB1
2.57	-2.29	RCC1
2.56	-2.23	NME4
2.55	-2.34	EREG
2.54	-2.3	IRF2BPL
2.52	-2.24	RELL1
2.52	-2.14	TMEM14C
2.52	-2.28	TRPV2
2.51	-2.21	CR1
2.51	-2.21	STAU1
2.5	-2.14	FAM173A
2.49	-2.12	AC005264.1
2.49	-2.11	PTX3
2.49	-2.25	VAT1
2.48	-2.24	CDKN1A
2.47	-2.21	HSD17B11
2.45	-2.22	JUP
2.44	-2.04	YBEY
2.43	-2.14	STX10
2.43	-2.2	MAP1LC3B
2.41	-2.09	FAM45A
2.4	-2.12	DBNDD2
2.4	-2.18	GSTM1
2.39	-2.15	RER1
2.38	-2.09	RNASE2
2.38	-2.13	IL10
2.38	-2.02	IGKV3-11
2.37	-2.09	LILRA1
2.37	-2.02	AC025171.3
2.37	-2.09	MRPL54
2.36	-2.1	AHR
2.36	-2.06	MCTP2
2.35	-2.09	AKR1C1
2.35	-2.43	CYP1B1
2.34	-1.93	DENND3
2.31	-2.03	FOLR3
2.31	-2.07	AC004865.2
2.29	-2.1	PUSL1
2.29	-2.07	IGFBP7
2.27	-2.12	PLP2
2.26	-1.96	UBR4
2.26	-2.08	HCFC1R1
2.26	-1.91	AAED1
2.21	-1.98	RUNX1
2.2	-1.93	PPM1M
2.2	-2.08	EIF2S3
2.2	-2.07	IMPA2
2.18	-1.97	DDIT4
2.17	-1.88	ORAI3
2.17	-1.89	AC144652.1
2.16	-1.94	YIF1A
2.15	-1.87	CSGALNACT2
2.15	-1.95	KLF10
2.15	-1.7	ITGB2-AS1
2.15	-1.92	HDAC4
2.14	-1.93	TRMT6
2.14	-1.89	FIBP
2.13	-1.88	UPP1
2.11	-1.99	ALOX5AP
2.09	-1.72	ZNF668
2.08	-1.82	TP53INP2
2.08	-1.83	ACADVL
2.06	-1.79	RPS4X
2.06	-1.9	IFI30
2.04	-1.83	SRA1
2.04	-1.83	SLC25A39
2.04	-1.88	AC027031.2
2.02	-1.81	PRMT9
2.01	-1.7	CFD
1.98	-1.77	SERTAD1
1.97	-1.79	PRDX3
1.97	-1.75	LGALS3BP
1.97	-1.6	RAB33A
1.96	-1.83	SIGLEC1
1.96	-1.67	NECTIN2
1.96	-1.67	MIDN
1.95	-1.63	KDM6A
1.95	-1.7	AC093512.2
1.94	-1.81	UCP2
1.93	-1.65	HLA-DQB1
1.93	-1.65	KLF5
1.93	-1.66	KLF9
1.92	-1.74	SIL1
1.92	-1.63	PUDP
1.92	-1.73	SQOR
1.91	-1.6	PER1
1.9	-1.58	TRIB1
1.88	-1.65	LMNA
1.88	-1.68	DNAJB12
1.87	-1.73	CCL4L2
1.85	-1.61	FAM177A1
1.85	-1.65	PSMD2
1.85	-1.59	CSRNP1
1.85	-1.52	BLOC1S1
1.85	-1.65	GEMIN7
1.85	-1.55	ID1
1.84	-1.8	IFI27
1.84	-1.64	KBTBD8
1.84	-1.74	SELENOS
1.82	-1.59	FAM20A
1.81	-1.61	SCO2.1
1.81	-1.66	CRELD2
1.81	-1.65	AL360004.1
1.8	-1.66	TTC7A
1.8	-1.66	NFKBIE
1.79	-1.55	RETN
1.79	-1.58	MAFF
1.79	-1.56	FBXO6
1.77	-1.71	APEH
1.77	-1.76	LTB4R
1.77	-1.67	LRRFIP2
1.77	-1.47	QSOX1
1.76	-1.62	LILRA5
1.76	-1.48	GALR2
1.76	-1.66	HIGD2A
1.74	-1.52	WDR33
1.74	-1.6	MCEMP1
1.73	-1.56	LINC02029
1.73	-1.52	PHLDA2
1.73	-1.47	AEN
1.73	-1.61	SEMA6B
1.73	-1.55	VPS26A
1.72	-1.62	ADH5
1.72	-1.3	CBWD1
1.72	-1.58	SH3BP1
1.71	-1.51	IFI27L1
1.7	-1.41	ZC3HAV1
1.7	-1.52	HIST3H2A
1.69	-1.48	ROMO1
1.69	-1.49	TUBB4B
1.68	-1.46	CXorf40B
1.68	-1.48	PCBD1
1.67	-1.55	RELA
1.67	-1.5	IFNGR2
1.67	-1.52	SHISA5
1.67	-1.39	ZBTB43
1.65	-1.44	PPP1R15A
1.65	-1.63	CTSD
1.65	-1.48	CCDC85B
1.64	-1.56	IGFLR1
1.64	-1.53	THAP2
1.63	-1.44	UBE2F
1.63	-1.44	GPN1
1.62	-1.46	NDUFA11
1.62	-1.51	LRP10
1.62	-1.28	ZNF394
1.62	-1.3	NR4A3
1.61	-1.53	PLA2G16
1.61	-1.53	GCH1
1.6	-1.47	PPP4R3A
1.6	-1.37	ADSL
1.6	-1.33	DDT
1.6	-1.44	CCT8
1.59	-1.53	LILRB4
1.59	-1.39	MATR3.1
1.57	-1.4	JDP2
1.57	-1.52	PLBD2
1.57	-1.42	TBCB
1.56	-1.42	CLU
1.56	-1.49	PGAM1
1.56	-1.4	NAMPT
1.55	-1.35	MAGEF1
1.55	-1.34	EIF4B
1.55	-1.45	GYG1
1.54	-1.4	DCXR
1.54	-1.25	AMPH
1.54	-1.33	TMEM91
1.53	-1.51	PIN1
1.53	-1.28	AC004943.2
1.52	-1.35	TUFM
1.52	-1.39	PRDM8
1.52	-1.44	NR1H2
1.5	-1.39	NAA20
1.5	-1.34	NDUFB9
1.5	-1.35	C12orf57
1.49	-1.43	PIM3
1.48	-1.46	PCBP1
1.47	-1.3	HIC1
1.47	-1.31	NDST2
1.46	-1.19	MRPL28
1.46	-1.33	UROD
1.45	-1.22	SAR1A
1.45	-1.28	MYL6B
1.44	-1.4	RNF130
1.44	-1.38	RIN1
1.44	-1.3	APMAP
1.43	-1.36	GRPEL1
1.42	-1.27	RFX2
1.42	-1.4	RPL27A
1.42	-1.25	IGKV1-5
1.41	-1.16	TNFSF13
1.4	-1.27	PTTG1IP
1.4	-1.26	ERGIC3
1.39	-1.36	MAP3K8
1.38	-1.16	IGHV3-23
1.38	-1.34	AKR1A1
1.38	-1.24	TP53I3
1.37	-1.34	DUSP2
1.37	-1.2	SLC4A1
1.36	-1.07	TNFRSF12A
1.36	-1.22	RNASE3
1.36	-1.2	ADM
1.36	-1.18	MT-ND6
1.35	-1.28	RBM8A
1.35	-1.34	MAFB
1.35	-1.27	PRDX2
1.34	-1.35	LGALS9
1.34	-1.13	FLT3
1.34	-1.29	CD300C
1.34	-1.07	BAG3
1.34	-1.22	RNPEPL1
1.34	-1.11	RGS19
1.33	-1.3	HBA1
1.33	-1.11	MIR3945HG
1.33	-1.13	AC004922.1
1.33	-1.27	SSSCA1
1.33	-1.26	IFITM3
1.33	-1.17	FKBP5
1.32	-1.06	SLC7A7
1.32	-1.27	CYP1B1-AS1
1.32	-1.21	NKG7
1.32	-1.11	H2AFJ
1.32	-1.19	AC090617.5
1.31	-1.03	METTL7B
1.3	-1.15	FECH
1.3	-1.11	AZU1
1.3	-1.17	CDKN2D
1.29	-1.11	ARMC2
1.28	-1.08	PLSCR3
1.28	-1.13	NEU4
1.28	-1.22	AC011611.3
1.28	-1.08	NRAS
1.27	-1.23	BAG6
1.26	-1.21	P2RX1
1.26	-1.08	B4GALT5
1.24	-1.06	NAA60
1.23	-1.11	UFC1
1.23	-1.2	TXNL1
1.23	-1.1	IGHA1
1.23	-1.04	MAPK1IP1L
1.23	-0.907	GPR42
1.22	-0.964	GSR
1.2	-1.15	HADHA
1.2	-1.13	SLC25A3
1.2	-1.17	ITGB1BP1
1.19	-0.916	VSIG4
1.19	-1.13	AC012615.1
1.19	-1.06	KDELR1
1.19	-1.04	SEC22C
1.18	-0.941	TLR2
1.18	-1	ACSS2
1.18	-1.11	RPL5
1.17	-0.989	PTPMT1
1.17	-0.968	MCL1
1.17	-0.838	SPATS2L
1.17	-1.09	GLIPR1
1.17	-1.11	OAS3
1.17	-0.997	IL10RB
1.16	-1.03	CA1
1.16	-0.981	VMP1
1.15	-1.12	POMP
1.15	-1.15	CXCL8
1.14	-0.998	TLE4
1.14	-1.02	GRASP
1.14	-0.942	TM2D3
1.13	-1.11	ALAS2
1.13	-0.996	LACC1
1.12	-1.02	MPP1
1.11	-1.13	BAG1
1.11	-0.991	ILF2
1.11	-0.894	TICAM1
1.1	-1.1	PNPLA8
1.1	-0.967	HBEGF
1.1	-0.944	CD47
1.09	-1.03	ATP6V0E1
1.09	-1.08	CD33
1.08	-0.981	SAMSN1
1.08	-1.07	TMEM126A
1.08	-1.02	TRAPPC2L
1.08	-0.916	NAGPA
1.08	-0.888	TREM1
1.07	-0.958	FAM207A
1.07	-0.976	SNX4
1.07	-0.952	BCL3
1.07	-0.928	LAMP1
1.07	-0.962	ETS2
1.07	-0.917	OSR2
1.05	-0.919	CYBB
1.04	-0.962	DCTN2
1.04	-1.04	EIF3K
1.04	-1.05	EMC7
1.04	-1.05	RNF11
1.03	-0.946	LAIR1
1.03	-1.04	FAU
1.02	-0.944	IRF7
1.01	-0.975	JARID2
1.01	-0.772	FBXO9
1.01	-0.959	CYCS
1.01	-1.02	THBS1
1	-1.01	AUP1
0.999	-0.955	TSPYL2
0.999	-0.94	RPS10
0.995	-0.892	KLHDC7B
0.993	-0.933	SLC22A4
0.991	-0.887	AC016831.1
0.989	-0.946	BABAM2
0.984	-0.95	TMEM120A
0.98	-0.885	AHSP
0.978	-0.954	LIPA
0.972	-0.742	TTC39C
0.969	-0.929	TMBIM6
0.969	-0.834	FLNA
0.965	-0.925	TXNDC11
0.963	-0.763	RBM38
0.961	-0.942	CSTA
0.958	-0.919	HEBP1
0.952	-0.872	MYADM
0.952	-0.978	BCKDHA
0.945	-0.86	HELZ2
0.944	-1.11	CLTA
0.943	-0.881	SLC25A37
0.943	-0.808	RAB1B
0.94	-0.753	LAPTM4A
0.939	-1.02	LGALS2
0.939	-0.983	HBB
0.933	-0.845	LUC7L3
0.93	-0.727	SBDS
0.926	-0.821	ATP6V0B
0.924	-0.879	SRI
0.919	-0.941	GAPDH
0.919	-0.832	SERPINB6
0.915	-0.9	ZFAS1
0.914	-0.867	MPG
0.913	-0.848	ABCA1
0.913	-0.873	MAD2L2
0.904	-0.831	IFI44
0.9	-0.755	RASSF5
0.896	-0.83	CXCL1
0.892	-0.797	LYPLA1
0.888	-0.872	ACTG1
0.886	-0.785	IMPDH1
0.883	-0.918	SDF4
0.88	-0.835	S100A10
0.877	-0.752	ELOVL1
0.874	-0.87	THBD
0.87	-0.89	BTF3
0.869	-0.807	KLF6
0.868	-0.783	AC245014.3
0.859	-0.769	PPIB
0.858	-0.703	TRIM14
0.858	-0.724	ID2
0.85	-0.787	DDOST
0.849	-0.693	NDUFB8
0.848	-0.765	C19orf24
0.846	-0.755	TWISTNB
0.834	-0.862	UQCRB
0.834	-0.76	DAP
0.83	-0.678	PLEKHG2
0.829	-0.745	PABPC1
0.827	-0.838	NR4A2
0.821	-0.756	YIF1B
0.82	-0.801	TUBA1C
0.813	-0.637	PLIN2
0.808	-0.799	ITGAM
0.807	-0.707	ADGRE5
0.806	-0.825	RNF24
0.804	-0.798	HP
0.803	-0.674	NAGA
0.803	-0.805	RPL23
0.799	-0.872	CHCHD2
0.799	-0.794	GABARAPL1
0.796	-0.884	BST2
0.794	-0.647	GYPC
0.793	-0.781	PHC2
0.787	-0.805	LRG1
0.787	-0.728	ZFAND2A
0.786	-0.705	AF213884.3
0.785	-0.734	ANXA4
0.783	-0.749	NHP2
0.774	-0.666	PLPPR2
0.772	-0.749	RPS25
0.771	-0.746	TMEM208
0.765	-0.726	ENO1
0.759	-0.69	TRAPPC3
0.755	-0.612	NDUFB11
0.755	-0.633	CTSB
0.748	-0.643	RPLP2
0.747	-0.8	TMEM219
0.745	-0.656	APH1A
0.739	-0.654	LGALS1
0.738	-0.698	PSMB6
0.734	-0.536	EAF1
0.73	-0.661	FPR1
0.728	-0.698	SUSD6
0.727	-0.755	TRAF7
0.727	-0.68	CRTAP
0.727	-0.712	SOCS3
0.726	-0.554	AVPI1
0.724	-0.598	SELENOW
0.719	-0.676	MXD1
0.714	-0.731	CALM3
0.712	-0.667	RAPH1
0.712	-0.565	AREG
0.709	-0.638	PDE4D
0.706	-0.658	BCL7B
0.705	-0.687	BCL2A1
0.703	-0.604	CD55
0.7	-0.761	EPSTI1
0.699	-0.753	ARPC1B
0.696	-0.649	RPSA
0.695	-0.57	ZCCHC2
0.693	-0.69	ILK
0.691	-0.694	MSC
0.691	-0.685	RPS7
0.683	-0.653	MAP2K1
0.678	-0.686	RPL30
0.677	-0.575	LUCAT1
0.677	-0.636	EPHB6
0.676	-0.686	IRS2
0.676	-0.626	MT-CYB
0.675	-0.565	JMJD6
0.673	-0.595	PKM
0.672	-0.708	SCYL1
0.672	-0.65	LDLR
0.672	-0.653	GPR183
0.67	-0.628	NUP58
0.67	-0.603	HDHD5
0.67	-0.615	CTSA
0.666	-0.707	ATXN10
0.664	-0.716	HINT1
0.663	-0.568	VPS4A
0.661	-0.61	HNRNPDL
0.66	-0.7	BLVRA
0.65	-0.582	FOSL1
0.647	-0.603	LRPAP1
0.645	-0.689	CCNI
0.643	-0.634	IER3
0.641	-0.586	MAPK6
0.64	-0.678	GLMP
0.636	-0.637	TOMM22
0.636	-0.4	NIPA2
0.634	-0.588	TAF13
0.629	-0.625	PSMA7
0.623	-0.669	WDR45B
0.623	-0.428	EPHA1-AS1
0.621	-0.497	TBKBP1
0.619	-0.609	TMX4
0.618	-0.512	CSNK1A1
0.618	-0.606	DEDD
0.609	-0.544	ANXA6
0.605	-0.6	FCER1G
0.603	-0.624	EIPR1
0.602	-0.547	GRK6
0.601	-0.624	CCDC124
0.599	-0.558	TRAPPC5
0.588	-0.621	MT-ATP6
0.585	-0.392	TRIM7
0.582	-0.78	PRR13
0.581	-0.543	EIF4E
0.581	-0.509	CNIH1
0.58	-0.53	CDA
0.577	-0.637	RPS3
0.576	-0.526	RRM2B
0.575	-0.538	TSSC4
0.574	-0.632	SNAI1
0.57	-0.679	IL1B
0.567	-0.437	TPGS1
0.563	-0.52	LGALS3
0.562	-0.497	H3F3A
0.561	-0.57	MGST3
0.557	-0.54	SLC25A6
0.556	-0.56	SMIM3
0.553	-0.591	ZNF331
0.551	-0.599	LILRA2
0.545	-0.443	OVCA2
0.544	-0.504	SH3BP5
0.538	-0.658	CXCL2
0.537	-0.579	PSMB2
0.531	-0.507	CD36
0.528	-0.699	LY6E
0.528	-0.485	APBB3
0.527	-0.404	MFSD10
0.525	-0.472	MRPL23
0.524	-0.486	ADAMTS2
0.518	-0.485	HOXA10
0.513	-0.541	LRMDA
0.513	-0.527	SERINC2
0.506	-0.391	ASGR2
0.505	-0.519	CD63
0.505	-0.422	PADI4
0.503	-0.549	PLD3
0.5	-0.52	TSPO
0.5	-0.469	SUMO3
0.491	-0.531	PROK2
0.49	-0.532	RPS13
0.489	-0.586	B2M
0.485	-0.478	FAM49B
0.481	-0.451	PSMB8
0.476	-0.586	PDIA3
0.473	-0.546	GNG10
0.472	-0.379	C5AR1
0.465	-0.439	RPL31
0.451	-0.338	DNASE2
0.45	-0.414	OXSR1
0.45	-0.362	ATP2B1-AS1
0.45	-0.406	PSAP
0.448	-0.344	EHD4
0.442	-0.524	EZR
0.441	-0.435	AC016831.5
0.44	-0.4	PCIF1
0.438	-0.371	HLX
0.438	-0.488	TENT5C
0.437	-0.44	SKP1
0.431	-0.407	ASMTL
0.43	-0.485	LTA4H
0.428	-0.426	CHMP4B
0.427	-0.451	CUEDC2
0.417	-0.442	MRPS12
0.417	-0.459	IFITM1
0.415	-0.436	MIS18BP1
0.409	-0.35	ZYX
0.408	-0.503	GABARAP
0.407	-0.336	HSD17B10
0.402	-0.404	MYL6
0.401	-0.495	SLC43A2
0.398	-0.282	ZBTB10
0.395	-0.383	DNAJC3
0.394	-0.432	BTG3
0.392	-0.333	MRPL43
0.389	-0.408	RPL23A
0.387	-0.347	EHD1
0.386	-0.372	GADD45GIP1
0.386	-0.491	SMAD3
0.385	-0.369	LCP1
0.381	-0.359	ADRM1
0.38	-0.4	SSU72
0.375	-0.256	SPG21
0.374	-0.243	PURB
0.371	-0.449	IRF2BP2
0.369	-0.296	ACOX2
0.366	-0.403	TMSB10
0.366	-0.537	CNIH4
0.359	-0.294	EEF1D
0.358	-0.473	HACD4
0.358	-0.315	PDCD6
0.355	-0.381	SPAG5
0.353	-0.207	FAM129B
0.351	-0.354	HM13
0.349	-0.488	IFI44L
0.347	-0.444	CARD19
0.346	-0.308	FCGRT
0.344	-0.38	LDHB
0.343	-0.248	GAS6
0.342	-0.254	QPCT
0.341	-0.385	BLVRB
0.34	-0.309	IL6
0.34	-0.224	MYDGF
0.339	-0.281	SCCPDH
0.339	-0.244	FAM198B
0.337	-0.305	LAMTOR2
0.332	-0.323	CXorf40A
0.324	-0.341	CISD3
0.324	-0.427	RPL9
0.316	-0.298	TNFAIP6
0.315	-0.368	SHKBP1
0.313	-0.351	RILPL2
0.31	-0.264	AKR7A2
0.31	-0.196	FOXO3
0.308	-0.434	S100A6
0.307	-0.206	HIST1H2BK
0.306	-0.204	SNAI3
0.305	-0.315	SH3BGRL3
0.305	-0.33	SPTY2D1
0.302	-0.358	RPL41
0.3	-0.34	ZC3H12A
0.299	-0.304	USP38
0.295	-0.373	RPS18
0.29	-0.211	MN1
0.288	-0.271	F13A1
0.287	-0.319	CYB5R3
0.285	-0.289	PPA1
0.283	-0.353	RAC1
0.281	-0.32	NAP1L1
0.28	-0.242	ACO2
0.279	-0.297	MGAT4A
0.278	-0.3	S100P
0.274	-0.417	RPL27
0.273	-0.328	JOSD2
0.273	-0.193	CYSTM1
0.272	-0.267	NEK6
0.268	-0.291	H2AFY
0.259	-0.229	G6PD
0.256	-0.317	NINJ1
0.256	-0.252	NFKBIA
0.252	-0.285	RPS11
0.25	-0.179	AC037198.2
0.249	-0.297	SLC27A3
0.248	-0.175	SIRPA
0.245	-0.373	IFI35
0.244	-0.127	TNS1
0.24	-0.136	UBE2J1
0.237	-0.193	COX7A2L
0.233	-0.275	PFN1
0.233	-0.206	NCOA4
0.227	-0.186	AP3B1
0.225	-0.227	NDEL1
0.22	-0.237	LHFPL2
0.218	-0.216	EMP1
0.218	-0.236	GLIPR2
0.215	-0.225	AP2S1
0.212	-0.192	CMPK2
0.212	-0.273	CD68
0.211	-0.249	VIM-AS1
0.21	-0.306	SMCO4
0.206	-0.322	HLA-A
0.204	-0.168	C19orf66
0.202	-0.236	ADIPOR1
0.2	-0.288	OTOF
0.197	-0.308	PPP1CA
0.196	-0.0283	BIN1
0.195	-0.304	UBE2L6
0.194	-0.135	ETHE1
0.192	-0.277	MTDH
0.191	-0.207	ZNF524
0.189	-0.12	POLE4
0.187	-0.245	HDAC1
0.187	-0.133	CH25H
0.186	-0.198	GPAA1
0.184	-0.0972	TMED9
0.181	-0.218	TNFAIP3
0.181	-0.161	IL1RAP
0.181	-0.124	AP5B1
0.176	-0.278	RPS15
0.174	-0.151	GPAT4
0.174	-0.265	TALDO1
0.174	-0.35	IFI6
0.172	-0.0818	JUN
0.165	-0.25	ARF5
0.164	-0.298	FERMT3
0.16	-0.29	TXNDC17
0.159	-0.247	GRN
0.157	-0.217	MS4A4A
0.157	-0.233	SEC13
0.156	-0.269	REEP5
0.151	-0.222	PYCARD
0.148	-0.0408	STOML2
0.147	-0.136	INSIG1
0.147	-0.254	HEXB
0.146	-0.208	UBA52
0.145	-0.13	ACSF3
0.139	-0.239	CYC1
0.137	-0.185	IL24
0.136	-0.117	SYAP1
0.135	-0.188	AHCY
0.131	-0.203	HBM
0.13	-0.126	PFDN5
0.129	-0.124	PUF60
0.129	-0.118	LAMTOR1
0.127	-0.17	COMMD6
0.126	-0.167	CORO1A
0.12	-0.102	LEKR1
0.12	-0.19	RPS27A
0.119	-0.179	SLC35B1
0.116	-0.147	PPM1G
0.115	-0.184	HBD
0.114	-0.211	TXNDC12
0.111	-0.0837	FFAR2
0.11	-0.119	ASL
0.106	-0.126	BACH1
0.104	-0.267	VIM
0.0998	-0.0857	UQCRC1
0.0974	-0.139	ADI1
0.0935	-0.045	HIST1H1D
0.0935	-0.169	S100A4
0.092	-0.136	RAB31
0.0911	-0.156	ZFP36
0.0899	-0.0879	GCHFR
0.0893	-0.126	PLAUR
0.0874	-0.0727	RPL12
0.0873	-0.139	IFITM2
0.0871	-0.0645	CDKN1B
0.0867	0.0198	ACP5
0.0857	-0.2	RPS27
0.0842	-0.111	RPL36A
0.0838	-0.0567	TNIP2
0.0819	-0.138	RPL36
0.0783	-0.27	MTCH2
0.0763	-0.0992	USP12
0.0749	-0.143	FCGR3A
0.0742	-0.086	CHCHD5
0.0733	0.0101	CD52
0.071	-0.0636	CCL20
0.068	-0.0588	CTDSP1
0.0669	-0.0805	RPL37
0.0644	-0.161	RPL13A
0.064	-0.0896	EIF2AK3
0.0619	-0.0635	SF3B4
0.0605	-0.0331	JUND
0.0599	-0.0859	PDE4B
0.0559	-0.244	MYD88
0.0554	-0.122	FLOT2
0.0552	0.0327	POLR3GL
0.0547	-0.277	ACTB
0.0544	-0.154	PSMA6
0.0539	-0.0575	PGK1
0.0535	-0.0767	RPL19
0.0523	-0.0476	CTSH
0.05	-0.0786	RPL29
0.048	-0.138	P2RY13
0.0435	0.042	TMEM170B
0.0415	-0.166	PTGS2
0.0404	-0.0925	AC016831.7
0.0393	-0.199	CREG1
0.0387	-0.0591	S100A8
0.0361	-0.112	AGTRAP
0.0335	-0.111	UBE2D3
0.033	-0.176	MRPS24
0.0278	0.035	ZNF580
0.023	-0.11	RAB13
0.0193	-0.0426	CLPP
0.0189	0.0511	RNF7
0.0188	0.0719	AK4
0.0187	0.105	ECE1
0.0171	-0.114	RPL39
0.0039	-0.126	HBA2
-0.00391	-0.00747	GPSM3
-0.00435	0.0613	AL445524.1
-0.00839	-0.0042	PLEKHJ1
-0.0116	-0.0361	RPL10
-0.0141	-0.102	IL1RN
-0.0184	-0.0842	HMGB1
-0.0247	0.00906	PGM1
-0.0268	-0.0641	SMS
-0.0352	-0.047	CD163
-0.0354	-0.0787	MALAT1
-0.036	-0.0766	S100A11
-0.0382	-0.0791	DRAM1
-0.0384	-0.0874	ISG15
-0.0421	-0.0217	HSPB1
-0.0432	0.0304	SLA
-0.0499	-0.171	TPM3
-0.0511	0.0174	PGLS
-0.0533	0.0537	STX11
-0.0563	0.0983	AD000671.2
-0.0566	0.0277	RASGRP3
-0.0607	-0.0151	MT1F
-0.0647	0.131	ABCB10
-0.0674	0.04	KCNQ1
-0.071	0.182	NDUFC2
-0.0713	0.0805	SOX4
-0.0746	-0.022	TMEM179B
-0.0752	0.103	MAPKAPK2
-0.0757	0.0724	TINF2
-0.076	-0.0419	FTH1
-0.0802	0.108	PHB2
-0.082	-0.0341	RPL35
-0.0822	-0.0918	WDR1
-0.0828	-0.0283	SMC1A
-0.0862	0.003	PPIF
-0.0876	-0.0606	GLRX
-0.0878	-0.0633	TMSB4X
-0.0891	0.0345	ZNF267
-0.0898	0.0947	RPS16
-0.0901	0.0592	EIF6
-0.0985	-0.0221	GTF2B
-0.0989	0.0559	KDELR2
-0.101	0.145	RSRP1
-0.102	-0.0183	PPP6C
-0.106	0.0476	COX8A
-0.114	0.0449	APLP2
-0.115	0.0535	TMEM59
-0.118	0.0668	RPS20
-0.12	-0.0174	AP1S1
-0.121	0.00432	RPL26
-0.122	0.0327	NEAT1
-0.122	0.143	SIK1B
-0.123	0.0234	PEPD
-0.123	0.0561	SAT1
-0.125	0.0412	HERC5
-0.125	-0.0541	ENSA
-0.125	0.0681	GNPTG
-0.127	0.167	MS4A6A
-0.128	0.107	MARCO
-0.131	0.0155	ARHGAP18
-0.138	0.0287	IGHV1-2
-0.138	-0.0295	GHITM
-0.141	0.0497	DUSP1
-0.142	0.00438	ZNF703
-0.145	0.00841	FABP5
-0.146	0.112	FOS
-0.15	0.113	RNASE1
-0.151	0.118	ETF1
-0.154	0.143	HOXA5
-0.156	0.161	H3F3B
-0.156	0.0953	RPL32
-0.158	0.0578	CTNNBIP1
-0.159	-0.0172	TPI1
-0.166	0.351	TMEM107
-0.175	0.0806	IL1R1
-0.178	0.0665	CD99
-0.188	0.225	CD300LF
-0.189	-0.0528	FLOT1
-0.192	0.18	EDN1
-0.196	0.227	AC123595.1
-0.2	0.164	FAM118A
-0.202	0.152	PPP1CB
-0.203	0.105	ITGB1
-0.205	-0.00554	FUNDC2
-0.206	0.099	RPL34
-0.209	0.106	SPCS1
-0.21	0.0634	RPS19
-0.214	0.163	PLIN5
-0.215	0.131	SYK
-0.215	0.0778	RETREG2
-0.217	0.0649	VAPA
-0.219	0.127	MT-ND4
-0.222	0.179	NDUFA10
-0.223	0.0677	MT-ND3
-0.225	0.195	PIGS
-0.225	0.149	SLC7A5
-0.233	0.238	LINC00847
-0.234	0.0546	CD74
-0.236	0.122	REX1BD
-0.238	0.0563	HSP90AA1
-0.239	0.154	FAM129A
-0.24	0.0893	RAB5C
-0.241	0.18	ABI3
-0.243	0.116	HLA-DRA
-0.244	0.165	RPL11
-0.25	0.107	MPHOSPH8
-0.252	0.00718	ARF1
-0.253	0.149	ID3
-0.253	0.135	RPL8
-0.258	0.269	RPN2
-0.261	0.0761	CAPG
-0.262	0.283	AGFG1
-0.263	0.173	SSR2
-0.266	0.157	CRIP1
-0.267	0.334	HMGB3
-0.269	0.114	PCBP2
-0.27	0.148	TMUB1
-0.271	0.312	SELENOF
-0.271	0.0884	RPL38
-0.274	0.0986	ANXA11
-0.275	0.0703	PHF11
-0.275	0.152	METRNL
-0.277	0.174	RPS2
-0.277	0.14	MT-CO1
-0.277	0.141	CTNNA1
-0.281	0.348	UBE2E3
-0.282	0.206	F5
-0.283	0.282	HAUS4
-0.284	0.214	TUBA1A
-0.287	0.21	HSPA1B
-0.295	0.22	BCL2L13
-0.296	0.241	COG3
-0.296	0.15	SYNGR2
-0.296	0.12	MOB3A
-0.298	0.214	OLR1
-0.298	0.295	RAB5IF
-0.299	0.246	SPINT1
-0.301	0.246	IAH1
-0.302	0.223	USP4
-0.303	0.223	OTUD1
-0.305	0.177	TYROBP
-0.308	0.335	GAB2
-0.31	0.169	TPT1
-0.313	0.365	TXNIP
-0.318	0.191	LST1
-0.318	0.208	AKAP9
-0.321	0.23	SELENBP1
-0.321	0.225	TRIM58
-0.323	0.257	GPR35
-0.325	0.444	ANAPC15
-0.327	0.0859	EEF1G
-0.334	0.37	DYSF
-0.338	0.206	CD300A
-0.345	0.301	ZDHHC3
-0.346	0.247	HADHB
-0.348	0.286	FAM20C
-0.35	0.209	SNX3
-0.353	0.246	RPS6
-0.354	0.371	STUB1
-0.354	0.301	FDPS
-0.362	0.271	RABAC1
-0.363	0.387	USB1
-0.367	0.328	FAM96A
-0.369	0.208	RPS12
-0.371	0.149	ATP6V0D1
-0.372	0.386	TOLLIP
-0.373	0.204	CCR1
-0.375	0.303	EPB42
-0.376	0.256	NLRP3
-0.379	0.392	SURF4
-0.381	0.29	PIM1
-0.383	0.257	HUS1
-0.384	0.222	MPST
-0.386	0.176	RPL37A
-0.387	0.257	AC015912.3
-0.387	0.282	LAPTM5
-0.388	0.351	HMGN2
-0.39	0.408	USP18
-0.396	0.229	CMTM7
-0.398	0.299	SEC62
-0.408	0.213	OST4
-0.408	0.307	ERP29
-0.411	0.266	LYZ
-0.413	0.317	GNG5
-0.414	0.271	PGD
-0.418	0.296	LFNG
-0.418	0.537	PMAIP1
-0.419	0.407	SLC39A8
-0.42	0.233	CXCL3
-0.425	0.503	GAS7
-0.433	0.308	CHP1
-0.435	0.388	CD14
-0.438	0.339	RPS24
-0.439	0.278	UQCR11
-0.44	0.35	RPS23
-0.444	0.416	OSTF1
-0.445	0.322	ATP5PB
-0.448	0.334	IL1A
-0.45	0.321	JUNB
-0.45	0.436	P4HB
-0.454	0.374	PPP2R1A
-0.463	0.34	ANXA1
-0.468	0.366	KCTD20
-0.471	0.254	ATOX1
-0.477	0.323	SVBP
-0.478	0.268	GNB2
-0.483	0.316	CAPN2
-0.483	0.289	PNRC1
-0.484	0.395	SNX17
-0.488	0.354	PRDX5
-0.503	0.309	PTMA
-0.511	0.47	SRGN
-0.511	0.396	SLC9B2
-0.512	0.443	TAGLN
-0.516	0.379	GM2A
-0.517	0.281	CAPN10-DT
-0.524	0.338	RPL13
-0.525	0.435	PPBP
-0.526	0.444	AL118516.1
-0.533	0.595	MGST1
-0.534	0.461	ICAM3
-0.537	0.365	SF3B2
-0.538	0.448	DERA
-0.54	0.388	FUCA1
-0.542	0.434	NCF4
-0.545	0.531	HDAC9
-0.545	0.411	PDIA6
-0.545	0.435	COX6B1
-0.554	0.341	SOD2
-0.557	0.456	TMA7
-0.559	0.524	SYS1
-0.565	0.464	BZW1
-0.573	0.362	MCUB
-0.582	0.427	SLC25A5
-0.593	0.529	GNAI3
-0.597	0.461	OSTC
-0.598	0.462	HLA-DPA1
-0.601	0.618	RGCC
-0.609	0.656	ECH1
-0.612	0.46	RHOA
-0.614	0.443	SRSF11
-0.615	0.496	SELL
-0.617	0.425	METTL9
-0.619	0.356	CSDE1
-0.619	0.499	CCL3
-0.619	0.574	ATP5F1A
-0.625	0.418	GABBR1
-0.626	0.565	ASPH
-0.628	0.456	STARD4
-0.633	0.452	LYPD2
-0.634	0.488	LAP3
-0.637	0.448	RWDD4
-0.64	0.497	TCN2
-0.642	0.592	TPPP3
-0.644	0.447	BNIP3L
-0.648	0.419	OAZ1
-0.648	0.647	GALNT11
-0.649	0.53	YPEL5
-0.652	0.439	CLNS1A
-0.652	0.432	PTPN1
-0.654	0.539	TMEM109
-0.665	0.468	RPL3
-0.665	0.62	PNP
-0.666	0.554	IRAK1
-0.671	0.541	HNRNPM
-0.675	0.615	KHDRBS1
-0.677	0.577	PRDX4
-0.677	0.466	ARPC2
-0.686	0.591	ARIH2
-0.687	0.593	PLBD1
-0.687	0.555	RPS15A
-0.694	0.546	RNH1
-0.695	0.545	ITGB2
-0.695	0.542	ZFP36L2
-0.698	0.558	ATP6V0C
-0.699	0.505	SEC61G
-0.699	0.634	WDR74
-0.701	0.57	RPL10A
-0.707	0.57	PHLDB1
-0.709	0.534	CDK11A
-0.714	0.618	XRN2
-0.717	0.542	IER2
-0.719	0.626	RPLP1
-0.72	0.505	RPL4
-0.722	0.576	BCL10
-0.724	0.62	CAPN1
-0.734	0.627	IFIT1B
-0.737	0.65	CDKN1C
-0.77	0.778	DHCR24
-0.783	0.644	PLIN3
-0.784	0.683	SLC10A3
-0.791	0.656	NXT1
-0.791	0.557	RPL28
-0.793	0.624	MT-ATP8
-0.796	0.721	MDH2
-0.798	0.66	CD109
-0.801	0.627	EMB
-0.803	0.685	GRK2
-0.805	0.755	FNDC3B
-0.808	0.587	GUK1
-0.813	0.607	UBE2D2
-0.815	0.595	TMEM52B
-0.816	0.627	RAB3D
-0.822	0.691	FURIN
-0.826	0.575	OS9
-0.827	0.674	LDHA
-0.837	0.706	ELK3
-0.84	0.676	GYPB
-0.841	0.759	RBM47
-0.841	0.671	TWF2
-0.85	0.681	CLIC1
-0.861	0.577	BLOC1S6
-0.863	0.846	H1FX
-0.864	0.833	HCST
-0.864	0.68	ELL2
-0.868	0.831	TRAF3IP3
-0.873	0.664	SQSTM1
-0.888	0.682	APOBEC3A
-0.892	0.696	ITM2B
-0.892	0.805	AC007952.4
-0.892	0.612	STK17A
-0.894	0.787	ELMSAN1
-0.898	0.714	PRELID1
-0.906	0.75	GIMAP7
-0.91	0.772	TSPAN17
-0.914	0.79	TAF1D
-0.915	0.743	JAZF1
-0.917	0.833	S100A12
-0.918	0.762	CES1
-0.925	0.733	SELENOK
-0.928	0.69	PSMC5
-0.934	0.633	RPS29
-0.938	0.761	TKT
-0.941	0.936	COPS6
-0.95	0.767	CALM1
-0.953	0.774	PTPRE
-0.954	0.732	DBI
-0.956	0.759	TOX4
-0.975	0.885	GET4
-0.983	0.893	VDAC2
-0.988	0.856	AC020916.1
-1	0.937	STRAP
-1	0.826	FMNL1
-1	0.809	DNAJB6
-1.01	0.912	ANG
-1.01	0.897	DDIT4-AS1
-1.01	0.886	NQO2
-1.02	0.845	GMPR
-1.02	0.758	ATP5MG
-1.02	0.801	ELF4
-1.02	0.995	ASNA1
-1.03	0.747	SSH1
-1.03	0.806	TPM4
-1.04	0.921	TCF25
-1.04	0.903	HSPA8
-1.04	0.894	SERPING1
-1.05	0.804	SERPINB1
-1.06	0.854	PDLIM2
-1.07	0.67	TMEM123
-1.07	0.778	BRI3
-1.09	0.861	COX7C
-1.1	0.828	SAP30
-1.1	0.909	GIMAP4
-1.1	0.956	ITGA5
-1.11	0.923	VTI1B
-1.12	0.899	RHOB
-1.13	0.953	G0S2
-1.13	0.969	EVL
-1.15	0.936	ZDHHC1
-1.15	1.06	LMNB1
-1.16	0.939	CARD16
-1.16	0.894	MAN2B1
-1.16	0.906	OSM
-1.17	1	JAML
-1.18	1.1	CD300LB
-1.19	1.02	ICAM1
-1.2	0.949	CTSL
-1.2	1.15	TPST2
-1.21	0.996	ARGLU1
-1.21	0.927	RPS14
-1.22	0.975	AL355075.4
-1.22	1	CD83
-1.22	1.02	RPL14
-1.23	1.03	PSMD8
-1.23	1.01	PELO
-1.23	1.12	CALCOCO2
-1.23	1.04	IRAK2
-1.24	1.02	GTF2E2
-1.25	1.08	FAM210B
-1.27	0.946	TOMM7
-1.27	0.977	ALDOA
-1.29	1.18	PIK3R5
-1.29	1.06	PLSCR1
-1.29	1.1	UFD1
-1.3	1.2	PSMD9
-1.31	1.06	LTB
-1.31	1.16	MTCH1
-1.32	1.11	OAS2
-1.33	1.13	RCSD1
-1.33	1.08	TXN
-1.33	1.16	CCND3
-1.34	1.19	NAA10
-1.36	1.1	KLF2
-1.38	1.15	CXXC5
-1.39	1.2	SQLE
-1.39	1.26	MAFG
-1.4	1.04	EPHB2
-1.4	1.07	PSMC3
-1.42	1.26	PRLR
-1.44	1.18	CD86
-1.45	1.17	HLA-B
-1.47	1.28	EIF4A1
-1.47	1.29	AC020911.2
-1.5	1.21	HSPA1A
-1.5	1.45	HIST1H1C
-1.51	1.19	CD4
-1.52	1.2	FDFT1
-1.53	1.3	ITGAX
-1.53	1.31	TNFRSF1B
-1.56	1.44	NBPF26
-1.56	1.48	RB1
-1.57	1.28	GNA15
-1.63	1.39	CLEC2B
-1.65	1.54	PTCH2
-1.66	1.43	DSE
-1.66	1.51	SYNJ2
-1.7	1.52	TMEM167A
-1.72	1.53	SHMT2
-1.72	1.44	PTPRC
-1.74	1.54	RGS2
-1.77	1.52	ATP6AP2
-1.78	1.52	PRDM1
-1.81	1.54	EIF4H
-1.82	1.43	POMC
-1.84	1.6	RSBN1L
-1.85	1.56	DDX17
-1.86	1.63	WSB1
-1.91	1.73	CELF1
-1.94	1.63	CKAP4
-1.96	1.74	BST1
-1.98	1.64	FGL2
-1.98	1.64	SMIM25
-2	1.7	UBTD1
-2.01	1.62	IER5
-2.02	1.83	AC012368.1
-2.02	1.73	HHEX
-2.09	1.9	ARSD
-2.11	1.69	NOTCH2NL
-2.14	1.94	AQP9
-2.18	1.69	NIPSNAP2
-2.25	1.99	SEC24D
-2.25	1.91	LAMB3
-2.28	1.92	MAP3K7CL
-2.29	1.98	OLA1
-2.3	1.89	NPL
-2.37	1.96	FAM110A
-2.4	2	TNFAIP2
-2.43	2.11	CXCR4
-2.45	1.98	OASL
-2.46	2.14	LINC00937
-2.47	2.08	NABP1
-2.49	2.02	CALM2
-2.52	2.27	DNTTIP2
-2.61	2.14	PLCB1
-2.69	2.39	RGS18
-2.71	2.35	SCAF11
-2.71	2.35	AC123595.2
-2.85	2.39	KDM5D
-2.97	2.58	CSF3R
-2.98	2.48	GPR84
-3.02	2.47	MX1
-3.03	2.56	A1BG
-3.04	2.53	LINC00278
-3.15	2.64	SIDT2
-3.2	2.78	CAVIN2
-3.34	2.87	TMEM176A
-4.06	3.47	UTY
-4.52	3.84	DDX3Y
-4.94	4.24	TMEM176B
-6.14	5.29	EIF1AY
-8.07	6.75	RPS4Y1
